# Supplementary material for: A survey of proteomic biomarkers for heterotopic ossification in blood serum
Source: J Orthop Surg Res. 2017 May 4;12:69. doi: 10.1186/s13018-017-0567-2 (PMC5418723; doi:10.1186/s13018-017-0567-2)
Supplement: Supplementary file 1 — Selection reaction monitoring (SRM) peptide transition parameters for protein candidates. Transition parameters and retention times of the 30 peptides were confirmed individually using an Agilent 6495 Triple Quadrapole Mass Spectrometer for both doubly and triply charged precursor ions. Five or 6 transitions per peptide precursor were selected for SRM analysis. In total, 350 transitions were optimized to identify and quantify 30 peptides. SRM target protein names, representative proteotypic peptide sequences, and SRM transition parameters are provided. (XLSX 68 kb) [file 13018_2017_567_MOESM1_ESM.xlsx]

## Sheet: SRM_Transitions
Additional File 1. SRM Transition Parameters for 10 proteins
Prortein Name	Peptide Sequence (three peptides for each protein)	Precursor Ion	MS1 Res	Product Ion	MS2 Res	Dwell	Fragmentor	Collision Energy	Cell Accelerator Voltage
bone sialoprotein 2 precursor [Homo sapiens]	HAYFYPHLK	588.3	UNIT	209.1	UNIT	5	380	20	5
bone sialoprotein 2 precursor [Homo sapiens]	HAYFYPHLK	588.3	UNIT	458.7	UNIT	5	380	20	5
bone sialoprotein 2 precursor [Homo sapiens]	HAYFYPHLK	588.3	UNIT	494.3	UNIT	5	380	24	5
bone sialoprotein 2 precursor [Homo sapiens]	HAYFYPHLK	588.3	UNIT	682.3	UNIT	5	380	24	5
bone sialoprotein 2 precursor [Homo sapiens]	HAYFYPHLK	588.3	UNIT	967.5	UNIT	5	380	20	5
bone sialoprotein 2 precursor [Homo sapiens]	HAYFYPHLK	588.3	UNIT	1038.5	UNIT	5	380	20	5
bone sialoprotein 2 precursor [Homo sapiens]	HAYFYPHLK	392.54	UNIT	209.1	UNIT	5	380	17	5
bone sialoprotein 2 precursor [Homo sapiens]	HAYFYPHLK	392.54	UNIT	247.7	UNIT	5	380	9	5
bone sialoprotein 2 precursor [Homo sapiens]	HAYFYPHLK	392.54	UNIT	372.2	UNIT	5	380	13	5
bone sialoprotein 2 precursor [Homo sapiens]	HAYFYPHLK	392.54	UNIT	397.3	UNIT	5	380	13	5
bone sialoprotein 2 precursor [Homo sapiens]	HAYFYPHLK	392.54	UNIT	494.3	UNIT	5	380	9	5
bone sialoprotein 2 precursor [Homo sapiens]	HAYFYPHLK	392.54	UNIT	519.2	UNIT	5	380	5	5
bone sialoprotein 2 precursor [Homo sapiens]	IEDSEENGVFK	633.8	UNIT	243.1	UNIT	5	380	18	5
bone sialoprotein 2 precursor [Homo sapiens]	IEDSEENGVFK	633.8	UNIT	294.2	UNIT	5	380	26	5
bone sialoprotein 2 precursor [Homo sapiens]	IEDSEENGVFK	633.8	UNIT	693.4	UNIT	5	380	22	5
bone sialoprotein 2 precursor [Homo sapiens]	IEDSEENGVFK	633.8	UNIT	909.4	UNIT	5	380	22	5
bone sialoprotein 2 precursor [Homo sapiens]	IEDSEENGVFK	633.8	UNIT	1024.5	UNIT	5	380	18	5
bone sialoprotein 2 precursor [Homo sapiens]	IEDSEENGVFK	633.8	UNIT	1153.5	UNIT	5	380	22	5
bone sialoprotein 2 precursor [Homo sapiens]	IEDSEENGVFK	422.87	UNIT	282.7	UNIT	5	380	2	5
bone sialoprotein 2 precursor [Homo sapiens]	IEDSEENGVFK	422.87	UNIT	294.2	UNIT	5	380	18	5
bone sialoprotein 2 precursor [Homo sapiens]	IEDSEENGVFK	422.87	UNIT	352.1	UNIT	5	380	2	5
bone sialoprotein 2 precursor [Homo sapiens]	IEDSEENGVFK	422.87	UNIT	450.3	UNIT	5	380	6	5
bone sialoprotein 2 precursor [Homo sapiens]	IEDSEENGVFK	422.87	UNIT	564.3	UNIT	5	380	2	5
bone sialoprotein 2 precursor [Homo sapiens]	IEDSEENGVFK	422.87	UNIT	574.2	UNIT	5	380	6	5
bone sialoprotein 2 precursor [Homo sapiens]	AYEDEYSYFK	657.78	UNIT	235.1	UNIT	5	380	19	5
bone sialoprotein 2 precursor [Homo sapiens]	AYEDEYSYFK	657.78	UNIT	294.2	UNIT	5	380	23	5
bone sialoprotein 2 precursor [Homo sapiens]	AYEDEYSYFK	657.78	UNIT	364.1	UNIT	5	380	15	5
bone sialoprotein 2 precursor [Homo sapiens]	AYEDEYSYFK	657.78	UNIT	622.3	UNIT	5	380	15	5
bone sialoprotein 2 precursor [Homo sapiens]	AYEDEYSYFK	657.78	UNIT	951.4	UNIT	5	380	19	5
bone sialoprotein 2 precursor [Homo sapiens]	AYEDEYSYFK	657.78	UNIT	1080.4	UNIT	5	380	19	5
bone sialoprotein 2 precursor [Homo sapiens]	AYEDEYSYFK	438.86	UNIT	235.1	UNIT	5	380	7	5
bone sialoprotein 2 precursor [Homo sapiens]	AYEDEYSYFK	438.86	UNIT	294.2	UNIT	5	380	15	5
bone sialoprotein 2 precursor [Homo sapiens]	AYEDEYSYFK	438.86	UNIT	386.1	UNIT	5	380	3	5
bone sialoprotein 2 precursor [Homo sapiens]	AYEDEYSYFK	438.86	UNIT	429.7	UNIT	5	380	3	5
bone sialoprotein 2 precursor [Homo sapiens]	AYEDEYSYFK	438.86	UNIT	457.2	UNIT	5	380	7	5
bone sialoprotein 2 precursor [Homo sapiens]	AYEDEYSYFK	438.86	UNIT	540.7	UNIT	5	380	3	5
bone sialoprotein 2 precursor [Homo sapiens]	AYEDEYSYFK	438.86	UNIT	544.3	UNIT	5	380	3	5
bone sialoprotein 2 precursor [Homo sapiens]	AYEDEYSYFK	438.86	UNIT	608.2	UNIT	5	380	3	5
osteocalcin preproprotein [Homo sapiens]	YLYQWLGAPVPYPDPLEPR	1137.58	UNIT	272.2	UNIT	5	380	36	5
osteocalcin preproprotein [Homo sapiens]	YLYQWLGAPVPYPDPLEPR	1137.58	UNIT	611.3	UNIT	5	380	44	5
osteocalcin preproprotein [Homo sapiens]	YLYQWLGAPVPYPDPLEPR	1137.58	UNIT	995.5	UNIT	5	380	36	5
osteocalcin preproprotein [Homo sapiens]	YLYQWLGAPVPYPDPLEPR	1137.58	UNIT	1083.6	UNIT	5	380	32	5
osteocalcin preproprotein [Homo sapiens]	YLYQWLGAPVPYPDPLEPR	1137.58	UNIT	1279.7	UNIT	5	380	36	5
osteocalcin preproprotein [Homo sapiens]	YLYQWLGAPVPYPDPLEPR	758.73	UNIT	412.2	UNIT	5	380	15	5
osteocalcin preproprotein [Homo sapiens]	YLYQWLGAPVPYPDPLEPR	758.73	UNIT	542.3	UNIT	5	380	15	5
osteocalcin preproprotein [Homo sapiens]	YLYQWLGAPVPYPDPLEPR	758.73	UNIT	546.8	UNIT	5	380	15	5
osteocalcin preproprotein [Homo sapiens]	YLYQWLGAPVPYPDPLEPR	758.73	UNIT	823.4	UNIT	5	380	19	5
osteocalcin preproprotein [Homo sapiens]	YLYQWLGAPVPYPDPLEPR	758.73	UNIT	1083.6	UNIT	5	380	15	5
osteocalcin preproprotein [Homo sapiens]	YLYQWLGAPVPYPDPLEPR	758.73	UNIT	1191.6	UNIT	5	380	15	5
osteocalcin preproprotein [Homo sapiens]	GAAFVSK	340.19	UNIT	200.1	UNIT	5	380	8	5
osteocalcin preproprotein [Homo sapiens]	GAAFVSK	340.19	UNIT	234.1	UNIT	5	380	12	5
osteocalcin preproprotein [Homo sapiens]	GAAFVSK	340.19	UNIT	276.2	UNIT	5	380	8	5
osteocalcin preproprotein [Homo sapiens]	GAAFVSK	340.19	UNIT	333.2	UNIT	5	380	12	5
osteocalcin preproprotein [Homo sapiens]	GAAFVSK	340.19	UNIT	480.3	UNIT	5	380	8	5
osteocalcin preproprotein [Homo sapiens]	GAAFVSK	340.19	UNIT	551.3	UNIT	5	380	8	5
osteocalcin preproprotein [Homo sapiens]	GAAFVSK	227.13	UNIT	200.1	UNIT	5	380	4	5
osteocalcin preproprotein [Homo sapiens]	GAAFVSK	227.13	UNIT	234.1	UNIT	5	380	0	5
osteocalcin preproprotein [Homo sapiens]	GAAFVSK	227.13	UNIT	267.1	UNIT	5	380	0	5
osteocalcin preproprotein [Homo sapiens]	GAAFVSK	227.13	UNIT	333.2	UNIT	5	380	0	5
osteocalcin preproprotein [Homo sapiens]	GAAFVSK	227.13	UNIT	347.2	UNIT	5	380	0	5
osteocalcin preproprotein [Homo sapiens]	GAAFVSK	227.13	UNIT	480.3	UNIT	5	380	4	5
osteocalcin preproprotein [Homo sapiens]	QEGSEVVK	438.23	UNIT	246.2	UNIT	5	380	15	5
osteocalcin preproprotein [Homo sapiens]	QEGSEVVK	438.23	UNIT	258.1	UNIT	5	380	11	5
osteocalcin preproprotein [Homo sapiens]	QEGSEVVK	438.23	UNIT	345.2	UNIT	5	380	15	5
osteocalcin preproprotein [Homo sapiens]	QEGSEVVK	438.23	UNIT	474.3	UNIT	5	380	11	5
osteocalcin preproprotein [Homo sapiens]	QEGSEVVK	438.23	UNIT	618.3	UNIT	5	380	15	5
osteocalcin preproprotein [Homo sapiens]	QEGSEVVK	438.23	UNIT	747.4	UNIT	5	380	15	5
osteocalcin preproprotein [Homo sapiens]	QEGSEVVK	292.49	UNIT	246.2	UNIT	5	380	4	5
osteocalcin preproprotein [Homo sapiens]	QEGSEVVK	292.49	UNIT	266.1	UNIT	5	380	0	5
osteocalcin preproprotein [Homo sapiens]	QEGSEVVK	292.49	UNIT	281.2	UNIT	5	380	4	5
osteocalcin preproprotein [Homo sapiens]	QEGSEVVK	292.49	UNIT	315.6	UNIT	5	380	0	5
osteocalcin preproprotein [Homo sapiens]	QEGSEVVK	292.49	UNIT	345.2	UNIT	5	380	4	5
osteocalcin preproprotein [Homo sapiens]	QEGSEVVK	292.49	UNIT	531.2	UNIT	5	380	4	5
osteomodulin precursor [Homo sapiens]	IDYGVFAK	456.75	UNIT	218.1	UNIT	5	380	20	5
osteomodulin precursor [Homo sapiens]	IDYGVFAK	456.75	UNIT	229.1	UNIT	5	380	8	5
osteomodulin precursor [Homo sapiens]	IDYGVFAK	456.75	UNIT	365.2	UNIT	5	380	20	5
osteomodulin precursor [Homo sapiens]	IDYGVFAK	456.75	UNIT	521.3	UNIT	5	380	12	5
osteomodulin precursor [Homo sapiens]	IDYGVFAK	456.75	UNIT	684.4	UNIT	5	380	12	5
osteomodulin precursor [Homo sapiens]	IDYGVFAK	456.75	UNIT	799.4	UNIT	5	380	12	5
osteomodulin precursor [Homo sapiens]	IDYGVFAK	304.83	UNIT	218.1	UNIT	5	380	12	5
osteomodulin precursor [Homo sapiens]	IDYGVFAK	304.83	UNIT	261.2	UNIT	5	380	0	5
osteomodulin precursor [Homo sapiens]	IDYGVFAK	304.83	UNIT	365.2	UNIT	5	380	0	5
osteomodulin precursor [Homo sapiens]	IDYGVFAK	304.83	UNIT	449.2	UNIT	5	380	0	5
osteomodulin precursor [Homo sapiens]	IDYGVFAK	304.83	UNIT	521.3	UNIT	5	380	4	5
osteomodulin precursor [Homo sapiens]	IDYGVFAK	304.83	UNIT	548.3	UNIT	5	380	0	5
osteomodulin precursor [Homo sapiens]	LLLGYNEISK	575.33	UNIT	227.2	UNIT	5	380	16	5
osteomodulin precursor [Homo sapiens]	LLLGYNEISK	575.33	UNIT	340.3	UNIT	5	380	12	5
osteomodulin precursor [Homo sapiens]	LLLGYNEISK	575.33	UNIT	462.2	UNIT	5	380	12	5
osteomodulin precursor [Homo sapiens]	LLLGYNEISK	575.33	UNIT	753.4	UNIT	5	380	16	5
osteomodulin precursor [Homo sapiens]	LLLGYNEISK	575.33	UNIT	810.4	UNIT	5	380	20	5
osteomodulin precursor [Homo sapiens]	LLLGYNEISK	575.33	UNIT	923.5	UNIT	5	380	16	5
osteomodulin precursor [Homo sapiens]	LLLGYNEISK	383.89	UNIT	227.2	UNIT	5	380	5	5
osteomodulin precursor [Homo sapiens]	LLLGYNEISK	383.89	UNIT	234.1	UNIT	5	380	9	5
osteomodulin precursor [Homo sapiens]	LLLGYNEISK	383.89	UNIT	347.2	UNIT	5	380	5	5
osteomodulin precursor [Homo sapiens]	LLLGYNEISK	383.89	UNIT	402.2	UNIT	5	380	1	5
osteomodulin precursor [Homo sapiens]	LLLGYNEISK	383.89	UNIT	462.2	UNIT	5	380	5	5
osteomodulin precursor [Homo sapiens]	LLLGYNEISK	383.89	UNIT	476.3	UNIT	5	380	5	5
osteomodulin precursor [Homo sapiens]	NLEHLYLQNNEIEK	878.95	UNIT	494.3	UNIT	5	380	35	5
osteomodulin precursor [Homo sapiens]	NLEHLYLQNNEIEK	878.95	UNIT	607.3	UNIT	5	380	35	5
osteomodulin precursor [Homo sapiens]	NLEHLYLQNNEIEK	878.95	UNIT	700.9	UNIT	5	380	31	5
osteomodulin precursor [Homo sapiens]	NLEHLYLQNNEIEK	878.95	UNIT	1150.6	UNIT	5	380	35	5
osteomodulin precursor [Homo sapiens]	NLEHLYLQNNEIEK	878.95	UNIT	1263.7	UNIT	5	380	35	5
osteomodulin precursor [Homo sapiens]	NLEHLYLQNNEIEK	586.3	UNIT	437.7	UNIT	5	380	8	5
osteomodulin precursor [Homo sapiens]	NLEHLYLQNNEIEK	586.3	UNIT	506.3	UNIT	5	380	8	5
osteomodulin precursor [Homo sapiens]	NLEHLYLQNNEIEK	586.3	UNIT	746.4	UNIT	5	380	12	5
osteomodulin precursor [Homo sapiens]	NLEHLYLQNNEIEK	586.3	UNIT	765.4	UNIT	5	380	12	5
osteomodulin precursor [Homo sapiens]	NLEHLYLQNNEIEK	586.3	UNIT	770.4	UNIT	5	380	16	5
osteomodulin precursor [Homo sapiens]	NLEHLYLQNNEIEK	586.3	UNIT	874.4	UNIT	5	380	16	5
collagen alpha-2(I) chain precursor [Homo sapiens]	GPAGPSGPAGK	448.24	UNIT	226.1	UNIT	5	380	15	5
collagen alpha-2(I) chain precursor [Homo sapiens]	GPAGPSGPAGK	448.24	UNIT	283.1	UNIT	5	380	15	5
collagen alpha-2(I) chain precursor [Homo sapiens]	GPAGPSGPAGK	448.24	UNIT	429.2	UNIT	5	380	19	5
collagen alpha-2(I) chain precursor [Homo sapiens]	GPAGPSGPAGK	448.24	UNIT	613.3	UNIT	5	380	11	5
collagen alpha-2(I) chain precursor [Homo sapiens]	GPAGPSGPAGK	448.24	UNIT	670.3	UNIT	5	380	15	5
collagen alpha-2(I) chain precursor [Homo sapiens]	GPAGPSGPAGK	448.24	UNIT	741.4	UNIT	5	380	15	5
collagen alpha-2(I) chain precursor [Homo sapiens]	GPAGPSGPAGK	299.16	UNIT	204.1	UNIT	5	380	12	5
collagen alpha-2(I) chain precursor [Homo sapiens]	GPAGPSGPAGK	299.16	UNIT	215.1	UNIT	5	380	1	5
collagen alpha-2(I) chain precursor [Homo sapiens]	GPAGPSGPAGK	299.16	UNIT	275.2	UNIT	5	380	8	5
collagen alpha-2(I) chain precursor [Homo sapiens]	GPAGPSGPAGK	299.16	UNIT	283.1	UNIT	5	380	8	5
collagen alpha-2(I) chain precursor [Homo sapiens]	GPAGPSGPAGK	299.16	UNIT	372.2	UNIT	5	380	4	5
collagen alpha-2(I) chain precursor [Homo sapiens]	GPAGPSGPAGK	299.16	UNIT	524.2	UNIT	5	380	1	5
collagen alpha-2(I) chain precursor [Homo sapiens]	GEIGNPGR	400.21	UNIT	300.2	UNIT	5	380	6	5
collagen alpha-2(I) chain precursor [Homo sapiens]	GEIGNPGR	400.21	UNIT	307.2	UNIT	5	380	6	5
collagen alpha-2(I) chain precursor [Homo sapiens]	GEIGNPGR	400.21	UNIT	329.2	UNIT	5	380	10	5
collagen alpha-2(I) chain precursor [Homo sapiens]	GEIGNPGR	400.21	UNIT	443.2	UNIT	5	380	10	5
collagen alpha-2(I) chain precursor [Homo sapiens]	GEIGNPGR	400.21	UNIT	500.3	UNIT	5	380	10	5
collagen alpha-2(I) chain precursor [Homo sapiens]	GEIGNPGR	400.21	UNIT	613.3	UNIT	5	380	10	5
collagen alpha-2(I) chain precursor [Homo sapiens]	GEIGNPGR	267.14	UNIT	232.1	UNIT	5	380	8	5
collagen alpha-2(I) chain precursor [Homo sapiens]	GEIGNPGR	267.14	UNIT	307.2	UNIT	5	380	0	5
collagen alpha-2(I) chain precursor [Homo sapiens]	GEIGNPGR	267.14	UNIT	329.2	UNIT	5	380	4	5
collagen alpha-2(I) chain precursor [Homo sapiens]	GEIGNPGR	267.14	UNIT	357.2	UNIT	5	380	1	5
collagen alpha-2(I) chain precursor [Homo sapiens]	GEIGNPGR	267.14	UNIT	471.2	UNIT	5	380	0	5
collagen alpha-2(I) chain precursor [Homo sapiens]	GEIGNPGR	267.14	UNIT	500.3	UNIT	5	380	8	5
collagen alpha-2(I) chain precursor [Homo sapiens]	AQPENIPAK	484.26	UNIT	315.2	UNIT	5	380	21	5
collagen alpha-2(I) chain precursor [Homo sapiens]	AQPENIPAK	484.26	UNIT	384.7	UNIT	5	380	13	5
collagen alpha-2(I) chain precursor [Homo sapiens]	AQPENIPAK	484.26	UNIT	426.2	UNIT	5	380	21	5
collagen alpha-2(I) chain precursor [Homo sapiens]	AQPENIPAK	484.26	UNIT	428.3	UNIT	5	380	21	5
collagen alpha-2(I) chain precursor [Homo sapiens]	AQPENIPAK	484.26	UNIT	542.3	UNIT	5	380	21	5
collagen alpha-2(I) chain precursor [Homo sapiens]	AQPENIPAK	484.26	UNIT	768.4	UNIT	5	380	9	5
collagen alpha-2(I) chain precursor [Homo sapiens]	AQPENIPAK	323.18	UNIT	200.1	UNIT	5	380	4	5
collagen alpha-2(I) chain precursor [Homo sapiens]	AQPENIPAK	323.18	UNIT	218.1	UNIT	5	380	12	5
collagen alpha-2(I) chain precursor [Homo sapiens]	AQPENIPAK	323.18	UNIT	315.2	UNIT	5	380	1	5
collagen alpha-2(I) chain precursor [Homo sapiens]	AQPENIPAK	323.18	UNIT	327.2	UNIT	5	380	0	5
collagen alpha-2(I) chain precursor [Homo sapiens]	AQPENIPAK	323.18	UNIT	384.7	UNIT	5	380	1	5
collagen alpha-2(I) chain precursor [Homo sapiens]	AQPENIPAK	323.18	UNIT	540.2	UNIT	5	380	0	5
collagen alpha-1(V) chain isoform 2 preproprotein [Homo sapiens]	VLDFHNLPDGITK	734.89	UNIT	248.2	UNIT	5	380	30	5
collagen alpha-1(V) chain isoform 2 preproprotein [Homo sapiens]	VLDFHNLPDGITK	734.89	UNIT	497.8	UNIT	5	380	30	5
collagen alpha-1(V) chain isoform 2 preproprotein [Homo sapiens]	VLDFHNLPDGITK	734.89	UNIT	571.3	UNIT	5	380	26	5
collagen alpha-1(V) chain isoform 2 preproprotein [Homo sapiens]	VLDFHNLPDGITK	734.89	UNIT	628.8	UNIT	5	380	26	5
collagen alpha-1(V) chain isoform 2 preproprotein [Homo sapiens]	VLDFHNLPDGITK	734.89	UNIT	630.3	UNIT	5	380	30	5
collagen alpha-1(V) chain isoform 2 preproprotein [Homo sapiens]	VLDFHNLPDGITK	734.89	UNIT	839.4	UNIT	5	380	30	5
collagen alpha-1(V) chain isoform 2 preproprotein [Homo sapiens]	VLDFHNLPDGITK	490.27	UNIT	213.2	UNIT	5	380	9	5
collagen alpha-1(V) chain isoform 2 preproprotein [Homo sapiens]	VLDFHNLPDGITK	490.27	UNIT	497.8	UNIT	5	380	13	5
collagen alpha-1(V) chain isoform 2 preproprotein [Homo sapiens]	VLDFHNLPDGITK	490.27	UNIT	571.3	UNIT	5	380	13	5
collagen alpha-1(V) chain isoform 2 preproprotein [Homo sapiens]	VLDFHNLPDGITK	490.27	UNIT	628.8	UNIT	5	380	5	5
collagen alpha-1(V) chain isoform 2 preproprotein [Homo sapiens]	VLDFHNLPDGITK	490.27	UNIT	630.3	UNIT	5	380	13	5
collagen alpha-1(V) chain isoform 2 preproprotein [Homo sapiens]	VLDFHNLPDGITK	490.27	UNIT	685.4	UNIT	5	380	9	5
collagen alpha-1(V) chain isoform 2 preproprotein [Homo sapiens]	VLDFHNLPDGITK	310.84	UNIT	208.6	UNIT	5	380	0	5
collagen alpha-1(V) chain isoform 2 preproprotein [Homo sapiens]	VLDFHNLPDGITK	310.84	UNIT	258.1	UNIT	5	380	4	5
collagen alpha-1(V) chain isoform 2 preproprotein [Homo sapiens]	VLDFHNLPDGITK	310.84	UNIT	345.2	UNIT	5	380	8	5
collagen alpha-1(V) chain isoform 2 preproprotein [Homo sapiens]	VLDFHNLPDGITK	310.84	UNIT	416.2	UNIT	5	380	4	5
collagen alpha-1(V) chain isoform 2 preproprotein [Homo sapiens]	VLDFHNLPDGITK	310.84	UNIT	428.2	UNIT	5	380	0	5
collagen alpha-1(V) chain isoform 2 preproprotein [Homo sapiens]	VLDFHNLPDGITK	310.84	UNIT	515.2	UNIT	5	380	0	5
collagen alpha-1(V) chain isoform 2 preproprotein [Homo sapiens]	VLDFHNLPDGITK	709.71	UNIT	439.7	UNIT	5	380	13	5
collagen alpha-1(V) chain isoform 2 preproprotein [Homo sapiens]	VLDFHNLPDGITK	709.71	UNIT	448.3	UNIT	5	380	13	5
collagen alpha-1(V) chain isoform 2 preproprotein [Homo sapiens]	VLDFHNLPDGITK	709.71	UNIT	625.3	UNIT	5	380	13	5
collagen alpha-1(V) chain isoform 2 preproprotein [Homo sapiens]	VLDFHNLPDGITK	709.71	UNIT	731.4	UNIT	5	380	13	5
collagen alpha-1(V) chain isoform 2 preproprotein [Homo sapiens]	VLDFHNLPDGITK	709.71	UNIT	761.5	UNIT	5	380	13	5
collagen alpha-1(V) chain isoform 2 preproprotein [Homo sapiens]	VLDFHNLPDGITK	709.71	UNIT	862	UNIT	5	380	13	5
collagen alpha-1(V) chain isoform 2 preproprotein [Homo sapiens]	VLDFHNLPDGITK	709.71	UNIT	1249.7	UNIT	5	380	13	5
collagen alpha-1(V) chain isoform 2 preproprotein [Homo sapiens]	DAQLSAPTK	465.75	UNIT	315.1	UNIT	5	380	12	5
collagen alpha-1(V) chain isoform 2 preproprotein [Homo sapiens]	DAQLSAPTK	465.75	UNIT	345.2	UNIT	5	380	16	5
collagen alpha-1(V) chain isoform 2 preproprotein [Homo sapiens]	DAQLSAPTK	465.75	UNIT	372.7	UNIT	5	380	8	5
collagen alpha-1(V) chain isoform 2 preproprotein [Homo sapiens]	DAQLSAPTK	465.75	UNIT	428.2	UNIT	5	380	8	5
collagen alpha-1(V) chain isoform 2 preproprotein [Homo sapiens]	DAQLSAPTK	465.75	UNIT	503.3	UNIT	5	380	8	5
collagen alpha-1(V) chain isoform 2 preproprotein [Homo sapiens]	DAQLSAPTK	465.75	UNIT	616.4	UNIT	5	380	12	5
collagen alpha-1(V) chain isoform 2 preproprotein [Homo sapiens]	QLYPASAFPEDFSILTTVK	1064.05	UNIT	242.1	UNIT	5	380	38	5
collagen alpha-1(V) chain isoform 2 preproprotein [Homo sapiens]	QLYPASAFPEDFSILTTVK	1064.05	UNIT	405.2	UNIT	5	380	30	5
collagen alpha-1(V) chain isoform 2 preproprotein [Homo sapiens]	QLYPASAFPEDFSILTTVK	1064.05	UNIT	862	UNIT	5	380	30	5
collagen alpha-1(V) chain isoform 2 preproprotein [Homo sapiens]	QLYPASAFPEDFSILTTVK	1064.05	UNIT	943.5	UNIT	5	380	30	5
collagen alpha-1(V) chain isoform 2 preproprotein [Homo sapiens]	QLYPASAFPEDFSILTTVK	1064.05	UNIT	1249.7	UNIT	5	380	34	5
collagen alpha-1(V) chain isoform 2 preproprotein [Homo sapiens]	QLYPASAFPEDFSILTTVK	1064.05	UNIT	1396.7	UNIT	5	380	38	5
alkaline phosphatase, tissue-nonspecific isozyme isoform X3 [Homo sapiens]	GFFLLVEGGR	547.8	UNIT	289.2	UNIT	5	380	8	5
alkaline phosphatase, tissue-nonspecific isozyme isoform X3 [Homo sapiens]	GFFLLVEGGR	547.8	UNIT	352.2	UNIT	5	380	15	5
alkaline phosphatase, tissue-nonspecific isozyme isoform X3 [Homo sapiens]	GFFLLVEGGR	547.8	UNIT	418.2	UNIT	5	380	11	5
alkaline phosphatase, tissue-nonspecific isozyme isoform X3 [Homo sapiens]	GFFLLVEGGR	547.8	UNIT	517.3	UNIT	5	380	11	5
alkaline phosphatase, tissue-nonspecific isozyme isoform X3 [Homo sapiens]	GFFLLVEGGR	547.8	UNIT	630.4	UNIT	5	380	15	5
alkaline phosphatase, tissue-nonspecific isozyme isoform X3 [Homo sapiens]	GFFLLVEGGR	547.8	UNIT	743.4	UNIT	5	380	11	5
alkaline phosphatase, tissue-nonspecific isozyme isoform X3 [Homo sapiens]	GFFLLVEGGR	365.54	UNIT	259.1	UNIT	5	380	0	5
alkaline phosphatase, tissue-nonspecific isozyme isoform X3 [Homo sapiens]	GFFLLVEGGR	365.54	UNIT	289.2	UNIT	5	380	16	5
alkaline phosphatase, tissue-nonspecific isozyme isoform X3 [Homo sapiens]	GFFLLVEGGR	365.54	UNIT	339.2	UNIT	5	380	0	5
alkaline phosphatase, tissue-nonspecific isozyme isoform X3 [Homo sapiens]	GFFLLVEGGR	365.54	UNIT	418.2	UNIT	5	380	4	5
alkaline phosphatase, tissue-nonspecific isozyme isoform X3 [Homo sapiens]	GFFLLVEGGR	365.54	UNIT	445.8	UNIT	5	380	0	5
alkaline phosphatase, tissue-nonspecific isozyme isoform X3 [Homo sapiens]	GFFLLVEGGR	365.54	UNIT	578.3	UNIT	5	380	0	5
alkaline phosphatase, tissue-nonspecific isozyme isoform X3 [Homo sapiens]	ANEGTVGVSAATER	681.34	UNIT	547.3	UNIT	5	380	16	5
alkaline phosphatase, tissue-nonspecific isozyme isoform X3 [Homo sapiens]	ANEGTVGVSAATER	681.34	UNIT	572.3	UNIT	5	380	16	5
alkaline phosphatase, tissue-nonspecific isozyme isoform X3 [Homo sapiens]	ANEGTVGVSAATER	681.34	UNIT	634.3	UNIT	5	380	20	5
alkaline phosphatase, tissue-nonspecific isozyme isoform X3 [Homo sapiens]	ANEGTVGVSAATER	681.34	UNIT	790.4	UNIT	5	380	24	5
alkaline phosphatase, tissue-nonspecific isozyme isoform X3 [Homo sapiens]	ANEGTVGVSAATER	681.34	UNIT	889.5	UNIT	5	380	24	5
alkaline phosphatase, tissue-nonspecific isozyme isoform X3 [Homo sapiens]	ANEGTVGVSAATER	681.34	UNIT	1047.5	UNIT	5	380	24	5
alkaline phosphatase, tissue-nonspecific isozyme isoform X3 [Homo sapiens]	ANEGTVGVSAATER	454.56	UNIT	317.7	UNIT	5	380	4	5
alkaline phosphatase, tissue-nonspecific isozyme isoform X3 [Homo sapiens]	ANEGTVGVSAATER	454.56	UNIT	405.2	UNIT	5	380	4	5
alkaline phosphatase, tissue-nonspecific isozyme isoform X3 [Homo sapiens]	ANEGTVGVSAATER	454.56	UNIT	476.2	UNIT	5	380	12	5
alkaline phosphatase, tissue-nonspecific isozyme isoform X3 [Homo sapiens]	ANEGTVGVSAATER	454.56	UNIT	479.2	UNIT	5	380	4	5
alkaline phosphatase, tissue-nonspecific isozyme isoform X3 [Homo sapiens]	ANEGTVGVSAATER	454.56	UNIT	547.3	UNIT	5	380	8	5
alkaline phosphatase, tissue-nonspecific isozyme isoform X3 [Homo sapiens]	ANEGTVGVSAATER	454.56	UNIT	634.3	UNIT	5	380	8	5
alkaline phosphatase, tissue-nonspecific isozyme isoform X3 [Homo sapiens]	LDGLDLVDTWK	637.84	UNIT	229.1	UNIT	5	380	18	5
alkaline phosphatase, tissue-nonspecific isozyme isoform X3 [Homo sapiens]	LDGLDLVDTWK	637.84	UNIT	286.1	UNIT	5	380	22	5
alkaline phosphatase, tissue-nonspecific isozyme isoform X3 [Homo sapiens]	LDGLDLVDTWK	637.84	UNIT	434.2	UNIT	5	380	26	5
alkaline phosphatase, tissue-nonspecific isozyme isoform X3 [Homo sapiens]	LDGLDLVDTWK	637.84	UNIT	876.5	UNIT	5	380	18	5
alkaline phosphatase, tissue-nonspecific isozyme isoform X3 [Homo sapiens]	LDGLDLVDTWK	637.84	UNIT	1046.6	UNIT	5	380	18	5
alkaline phosphatase, tissue-nonspecific isozyme isoform X3 [Homo sapiens]	LDGLDLVDTWK	637.84	UNIT	1161.6	UNIT	5	380	18	5
alkaline phosphatase, tissue-nonspecific isozyme isoform X3 [Homo sapiens]	LDGLDLVDTWK	425.56	UNIT	229.1	UNIT	5	380	19	5
alkaline phosphatase, tissue-nonspecific isozyme isoform X3 [Homo sapiens]	LDGLDLVDTWK	425.56	UNIT	314.2	UNIT	5	380	3	5
alkaline phosphatase, tissue-nonspecific isozyme isoform X3 [Homo sapiens]	LDGLDLVDTWK	425.56	UNIT	324.7	UNIT	5	380	3	5
alkaline phosphatase, tissue-nonspecific isozyme isoform X3 [Homo sapiens]	LDGLDLVDTWK	425.56	UNIT	333.2	UNIT	5	380	15	5
alkaline phosphatase, tissue-nonspecific isozyme isoform X3 [Homo sapiens]	LDGLDLVDTWK	425.56	UNIT	514.2	UNIT	5	380	7	5
alkaline phosphatase, tissue-nonspecific isozyme isoform X3 [Homo sapiens]	LDGLDLVDTWK	425.56	UNIT	549.3	UNIT	5	380	3	5
phosphatidate phosphatase LPIN2 isoform X2 [Homo sapiens]	GLEPEVAALYFPK	717.39	UNIT	244.2	UNIT	5	380	37	5
phosphatidate phosphatase LPIN2 isoform X2 [Homo sapiens]	GLEPEVAALYFPK	717.39	UNIT	391.2	UNIT	5	380	17	5
phosphatidate phosphatase LPIN2 isoform X2 [Homo sapiens]	GLEPEVAALYFPK	717.39	UNIT	567.8	UNIT	5	380	17	5
phosphatidate phosphatase LPIN2 isoform X2 [Homo sapiens]	GLEPEVAALYFPK	717.39	UNIT	738.4	UNIT	5	380	25	5
phosphatidate phosphatase LPIN2 isoform X2 [Homo sapiens]	GLEPEVAALYFPK	717.39	UNIT	809.5	UNIT	5	380	21	5
phosphatidate phosphatase LPIN2 isoform X2 [Homo sapiens]	GLEPEVAALYFPK	717.39	UNIT	1134.6	UNIT	5	380	13	5
phosphatidate phosphatase LPIN2 isoform X2 [Homo sapiens]	GLEPEVAALYFPK	478.59	UNIT	244.2	UNIT	5	380	20	5
phosphatidate phosphatase LPIN2 isoform X2 [Homo sapiens]	GLEPEVAALYFPK	478.59	UNIT	391.2	UNIT	5	380	16	5
phosphatidate phosphatase LPIN2 isoform X2 [Homo sapiens]	GLEPEVAALYFPK	478.59	UNIT	554.3	UNIT	5	380	4	5
phosphatidate phosphatase LPIN2 isoform X2 [Homo sapiens]	GLEPEVAALYFPK	478.59	UNIT	567.8	UNIT	5	380	4	5
phosphatidate phosphatase LPIN2 isoform X2 [Homo sapiens]	GLEPEVAALYFPK	478.59	UNIT	696.4	UNIT	5	380	8	5
phosphatidate phosphatase LPIN2 isoform X2 [Homo sapiens]	GLEPEVAALYFPK	478.59	UNIT	738.4	UNIT	5	380	8	5
phosphatidate phosphatase LPIN2 isoform X2 [Homo sapiens]	VDSPSK	316.67	UNIT	215.1	UNIT	5	380	4	5
phosphatidate phosphatase LPIN2 isoform X2 [Homo sapiens]	VDSPSK	316.67	UNIT	234.1	UNIT	5	380	20	5
phosphatidate phosphatase LPIN2 isoform X2 [Homo sapiens]	VDSPSK	316.67	UNIT	331.2	UNIT	5	380	12	5
phosphatidate phosphatase LPIN2 isoform X2 [Homo sapiens]	VDSPSK	316.67	UNIT	418.2	UNIT	5	380	8	5
phosphatidate phosphatase LPIN2 isoform X2 [Homo sapiens]	VDSPSK	316.67	UNIT	533.3	UNIT	5	380	8	5
phosphatidate phosphatase LPIN2 isoform X2 [Homo sapiens]	VDSPSK	211.45	UNIT	200.1	UNIT	5	380	0	5
phosphatidate phosphatase LPIN2 isoform X2 [Homo sapiens]	VDSPSK	211.45	UNIT	215.1	UNIT	5	380	4	5
phosphatidate phosphatase LPIN2 isoform X2 [Homo sapiens]	VDSPSK	211.45	UNIT	234.1	UNIT	5	380	0	5
phosphatidate phosphatase LPIN2 isoform X2 [Homo sapiens]	VDSPSK	211.45	UNIT	331.2	UNIT	5	380	4	5
phosphatidate phosphatase LPIN2 isoform X2 [Homo sapiens]	VIPSEDNLISEVEK	786.41	UNIT	213.2	UNIT	5	380	16	5
phosphatidate phosphatase LPIN2 isoform X2 [Homo sapiens]	VIPSEDNLISEVEK	786.41	UNIT	591.3	UNIT	5	380	36	5
phosphatidate phosphatase LPIN2 isoform X2 [Homo sapiens]	VIPSEDNLISEVEK	786.41	UNIT	680.3	UNIT	5	380	20	5
phosphatidate phosphatase LPIN2 isoform X2 [Homo sapiens]	VIPSEDNLISEVEK	786.41	UNIT	704.4	UNIT	5	380	32	5
phosphatidate phosphatase LPIN2 isoform X2 [Homo sapiens]	VIPSEDNLISEVEK	786.41	UNIT	1175.6	UNIT	5	380	28	5
phosphatidate phosphatase LPIN2 isoform X2 [Homo sapiens]	VIPSEDNLISEVEK	786.41	UNIT	1262.6	UNIT	5	380	32	5
phosphatidate phosphatase LPIN2 isoform X2 [Homo sapiens]	VIPSEDNLISEVEK	786.41	UNIT	1359.7	UNIT	5	380	20	5
phosphatidate phosphatase LPIN2 isoform X2 [Homo sapiens]	VIPSEDNLISEVEK	524.61	UNIT	213.2	UNIT	5	380	6	5
phosphatidate phosphatase LPIN2 isoform X2 [Homo sapiens]	VIPSEDNLISEVEK	524.61	UNIT	352.7	UNIT	5	380	6	5
phosphatidate phosphatase LPIN2 isoform X2 [Homo sapiens]	VIPSEDNLISEVEK	524.61	UNIT	434.7	UNIT	5	380	6	5
phosphatidate phosphatase LPIN2 isoform X2 [Homo sapiens]	VIPSEDNLISEVEK	524.61	UNIT	591.3	UNIT	5	380	6	5
phosphatidate phosphatase LPIN2 isoform X2 [Homo sapiens]	VIPSEDNLISEVEK	524.61	UNIT	680.3	UNIT	5	380	6	5
phosphatidate phosphatase LPIN2 isoform X2 [Homo sapiens]	VIPSEDNLISEVEK	524.61	UNIT	704.4	UNIT	5	380	6	5
phosphatidate phosphatase LPIN2 isoform X2 [Homo sapiens]	VIPSEDNLISEVEK	524.61	UNIT	755.4	UNIT	5	380	6	5
RRP12-like protein isoform 3 [Homo sapiens]	FGFELVK	420.24	UNIT	205.1	UNIT	5	380	10	5
RRP12-like protein isoform 3 [Homo sapiens]	FGFELVK	420.24	UNIT	246.2	UNIT	5	380	18	5
RRP12-like protein isoform 3 [Homo sapiens]	FGFELVK	420.24	UNIT	488.3	UNIT	5	380	10	5
RRP12-like protein isoform 3 [Homo sapiens]	FGFELVK	420.24	UNIT	635.4	UNIT	5	380	10	5
RRP12-like protein isoform 3 [Homo sapiens]	FGFELVK	420.24	UNIT	692.4	UNIT	5	380	10	5
RRP12-like protein isoform 3 [Homo sapiens]	FGFELVK	420.24	UNIT	693.4	UNIT	5	380	10	5
RRP12-like protein isoform 3 [Homo sapiens]	FGFELVK	280.49	UNIT	205.1	UNIT	5	380	12	5
RRP12-like protein isoform 3 [Homo sapiens]	FGFELVK	280.49	UNIT	246.2	UNIT	5	380	0	5
RRP12-like protein isoform 3 [Homo sapiens]	FGFELVK	280.49	UNIT	352.2	UNIT	5	380	8	5
RRP12-like protein isoform 3 [Homo sapiens]	FGFELVK	280.49	UNIT	359.3	UNIT	5	380	8	5
RRP12-like protein isoform 3 [Homo sapiens]	FGFELVK	280.49	UNIT	481.2	UNIT	5	380	0	5
RRP12-like protein isoform 3 [Homo sapiens]	AAQHGVCSVLK	585.31	UNIT	260.2	UNIT	5	380	24	5
RRP12-like protein isoform 3 [Homo sapiens]	AAQHGVCSVLK	585.31	UNIT	450.2	UNIT	5	380	16	5
RRP12-like protein isoform 3 [Homo sapiens]	AAQHGVCSVLK	585.31	UNIT	465.2	UNIT	5	380	32	5
RRP12-like protein isoform 3 [Homo sapiens]	AAQHGVCSVLK	585.31	UNIT	762.4	UNIT	5	380	16	5
RRP12-like protein isoform 3 [Homo sapiens]	AAQHGVCSVLK	585.31	UNIT	899.5	UNIT	5	380	20	5
RRP12-like protein isoform 3 [Homo sapiens]	AAQHGVCSVLK	585.31	UNIT	910.4	UNIT	5	380	16	5
RRP12-like protein isoform 3 [Homo sapiens]	AAQHGVCSVLK	390.54	UNIT	446.3	UNIT	5	380	9	5
RRP12-like protein isoform 3 [Homo sapiens]	AAQHGVCSVLK	390.54	UNIT	450.2	UNIT	5	380	9	5
RRP12-like protein isoform 3 [Homo sapiens]	AAQHGVCSVLK	390.54	UNIT	514.3	UNIT	5	380	5	5
RRP12-like protein isoform 3 [Homo sapiens]	AAQHGVCSVLK	390.54	UNIT	549.8	UNIT	5	380	9	5
RRP12-like protein isoform 3 [Homo sapiens]	AAQHGVCSVLK	390.54	UNIT	606.3	UNIT	5	380	9	5
RRP12-like protein isoform 3 [Homo sapiens]	AAQHGVCSVLK	390.54	UNIT	762.4	UNIT	5	380	9	5
RRP12-like protein isoform 3 [Homo sapiens]	AVEEGLTYK	505.26	UNIT	310.2	UNIT	5	380	25	5
RRP12-like protein isoform 3 [Homo sapiens]	AVEEGLTYK	505.26	UNIT	411.2	UNIT	5	380	13	5
RRP12-like protein isoform 3 [Homo sapiens]	AVEEGLTYK	505.26	UNIT	420.2	UNIT	5	380	8	5
RRP12-like protein isoform 3 [Homo sapiens]	AVEEGLTYK	505.26	UNIT	581.3	UNIT	5	380	9	5
RRP12-like protein isoform 3 [Homo sapiens]	AVEEGLTYK	505.26	UNIT	710.4	UNIT	5	380	13	5
RRP12-like protein isoform 3 [Homo sapiens]	AVEEGLTYK	505.26	UNIT	839.4	UNIT	5	380	13	5
RRP12-like protein isoform 3 [Homo sapiens]	AVEEGLTYK	337.18	UNIT	300.2	UNIT	5	380	0	5
RRP12-like protein isoform 3 [Homo sapiens]	AVEEGLTYK	337.18	UNIT	310.2	UNIT	5	380	12	5
RRP12-like protein isoform 3 [Homo sapiens]	AVEEGLTYK	337.18	UNIT	411.2	UNIT	5	380	4	5
RRP12-like protein isoform 3 [Homo sapiens]	AVEEGLTYK	337.18	UNIT	420.2	UNIT	5	380	0	5
RRP12-like protein isoform 3 [Homo sapiens]	AVEEGLTYK	337.18	UNIT	486.2	UNIT	5	380	4	5
TRAF3-interacting protein 1 isoform X2 [Homo sapiens]	YLHDIITEVIR	686.39	UNIT	414.2	UNIT	5	380	24	5
TRAF3-interacting protein 1 isoform X2 [Homo sapiens]	YLHDIITEVIR	686.39	UNIT	548.3	UNIT	5	380	24	5
TRAF3-interacting protein 1 isoform X2 [Homo sapiens]	YLHDIITEVIR	686.39	UNIT	730.5	UNIT	5	380	20	5
TRAF3-interacting protein 1 isoform X2 [Homo sapiens]	YLHDIITEVIR	686.39	UNIT	843.5	UNIT	5	380	28	5
TRAF3-interacting protein 1 isoform X2 [Homo sapiens]	YLHDIITEVIR	686.39	UNIT	958.6	UNIT	5	380	28	5
TRAF3-interacting protein 1 isoform X2 [Homo sapiens]	YLHDIITEVIR	457.93	UNIT	288.2	UNIT	5	380	12	5
TRAF3-interacting protein 1 isoform X2 [Homo sapiens]	YLHDIITEVIR	457.93	UNIT	378.2	UNIT	5	380	4	5
TRAF3-interacting protein 1 isoform X2 [Homo sapiens]	YLHDIITEVIR	457.93	UNIT	387.3	UNIT	5	380	8	5
TRAF3-interacting protein 1 isoform X2 [Homo sapiens]	YLHDIITEVIR	457.93	UNIT	516.3	UNIT	5	380	12	5
TRAF3-interacting protein 1 isoform X2 [Homo sapiens]	YLHDIITEVIR	457.93	UNIT	617.4	UNIT	5	380	8	5
TRAF3-interacting protein 1 isoform X2 [Homo sapiens]	YLHDIITEVIR	457.93	UNIT	642.3	UNIT	5	380	8	5
TRAF3-interacting protein 1 isoform X2 [Homo sapiens]	ISFLQK	368.22	UNIT	201.1	UNIT	5	380	8	5
TRAF3-interacting protein 1 isoform X2 [Homo sapiens]	ISFLQK	368.22	UNIT	275.2	UNIT	5	380	16	5
TRAF3-interacting protein 1 isoform X2 [Homo sapiens]	ISFLQK	368.22	UNIT	348.2	UNIT	5	380	16	5
TRAF3-interacting protein 1 isoform X2 [Homo sapiens]	ISFLQK	368.22	UNIT	388.3	UNIT	5	380	12	5
TRAF3-interacting protein 1 isoform X2 [Homo sapiens]	ISFLQK	368.22	UNIT	535.3	UNIT	5	380	8	5
TRAF3-interacting protein 1 isoform X2 [Homo sapiens]	ISFLQK	368.22	UNIT	622.4	UNIT	5	380	8	5
TRAF3-interacting protein 1 isoform X2 [Homo sapiens]	ISFLQK	245.82	UNIT	268.2	UNIT	5	380	8	5
TRAF3-interacting protein 1 isoform X2 [Homo sapiens]	ISFLQK	245.82	UNIT	275.2	UNIT	5	380	0	5
TRAF3-interacting protein 1 isoform X2 [Homo sapiens]	ISFLQK	245.82	UNIT	311.7	UNIT	5	380	4	5
TRAF3-interacting protein 1 isoform X2 [Homo sapiens]	ISFLQK	245.82	UNIT	388.3	UNIT	5	380	4	5
TRAF3-interacting protein 1 isoform X2 [Homo sapiens]	ISFLQK	245.82	UNIT	535.3	UNIT	5	380	8	5
TRAF3-interacting protein 1 isoform X2 [Homo sapiens]	ITDCAVEPLK	573.3	UNIT	215.1	UNIT	5	380	16	5
TRAF3-interacting protein 1 isoform X2 [Homo sapiens]	ITDCAVEPLK	573.3	UNIT	357.2	UNIT	5	380	20	5
TRAF3-interacting protein 1 isoform X2 [Homo sapiens]	ITDCAVEPLK	573.3	UNIT	656.4	UNIT	5	380	20	5
TRAF3-interacting protein 1 isoform X2 [Homo sapiens]	ITDCAVEPLK	573.3	UNIT	816.4	UNIT	5	380	16	5
TRAF3-interacting protein 1 isoform X2 [Homo sapiens]	ITDCAVEPLK	573.3	UNIT	931.5	UNIT	5	380	16	5
TRAF3-interacting protein 1 isoform X2 [Homo sapiens]	ITDCAVEPLK	573.3	UNIT	1032.5	UNIT	5	380	16	5
TRAF3-interacting protein 1 isoform X2 [Homo sapiens]	ITDCAVEPLK	382.53	UNIT	281.1	UNIT	5	380	1	5
TRAF3-interacting protein 1 isoform X2 [Homo sapiens]	ITDCAVEPLK	382.53	UNIT	330.2	UNIT	5	380	1	5
TRAF3-interacting protein 1 isoform X2 [Homo sapiens]	ITDCAVEPLK	382.53	UNIT	357.2	UNIT	5	380	9	5
TRAF3-interacting protein 1 isoform X2 [Homo sapiens]	ITDCAVEPLK	382.53	UNIT	486.3	UNIT	5	380	1	5
TRAF3-interacting protein 1 isoform X2 [Homo sapiens]	ITDCAVEPLK	382.53	UNIT	561.2	UNIT	5	380	5	5
TRAF3-interacting protein 1 isoform X2 [Homo sapiens]	ITDCAVEPLK	382.53	UNIT	585.4	UNIT	5	380	1	5
protein phosphatase 1J [Homo sapiens]	AIIVR	286.2	UNIT	250.7	UNIT	5	380	4	5
protein phosphatase 1J [Homo sapiens]	AIIVR	286.2	UNIT	274.2	UNIT	5	380	8	5
protein phosphatase 1J [Homo sapiens]	AIIVR	286.2	UNIT	298.2	UNIT	5	380	1	5
protein phosphatase 1J [Homo sapiens]	AIIVR	286.2	UNIT	387.3	UNIT	5	380	4	5
protein phosphatase 1J [Homo sapiens]	AIIVR	286.2	UNIT	500.4	UNIT	5	380	8	5
protein phosphatase 1J [Homo sapiens]	ASFSRPTFLQLSPGGLR	917.5	UNIT	499.3	UNIT	5	380	44	5
protein phosphatase 1J [Homo sapiens]	ASFSRPTFLQLSPGGLR	917.5	UNIT	549.3	UNIT	5	380	44	5
protein phosphatase 1J [Homo sapiens]	ASFSRPTFLQLSPGGLR	917.5	UNIT	586.3	UNIT	5	380	44	5
protein phosphatase 1J [Homo sapiens]	ASFSRPTFLQLSPGGLR	917.5	UNIT	1248.7	UNIT	5	380	36	5
protein phosphatase 1J [Homo sapiens]	ASFSRPTFLQLSPGGLR	917.5	UNIT	1285.7	UNIT	5	380	44	5
protein phosphatase 1J [Homo sapiens]	ASFSRPTFLQLSPGGLR	917.5	UNIT	1335.7	UNIT	5	380	44	5
protein phosphatase 1J [Homo sapiens]	ASFSRPTFLQLSPGGLR	612	UNIT	250.1	UNIT	5	380	17	5
protein phosphatase 1J [Homo sapiens]	ASFSRPTFLQLSPGGLR	612	UNIT	499.3	UNIT	5	380	13	5
protein phosphatase 1J [Homo sapiens]	ASFSRPTFLQLSPGGLR	612	UNIT	568.3	UNIT	5	380	9	5
protein phosphatase 1J [Homo sapiens]	ASFSRPTFLQLSPGGLR	612	UNIT	586.3	UNIT	5	380	13	5
protein phosphatase 1J [Homo sapiens]	ASFSRPTFLQLSPGGLR	612	UNIT	624.8	UNIT	5	380	9	5
protein phosphatase 1J [Homo sapiens]	ASFSRPTFLQLSPGGLR	612	UNIT	668.4	UNIT	5	380	9	5
protein phosphatase 1J [Homo sapiens]	ASFSRPTFLQLSPGGLR	612	UNIT	699.4	UNIT	5	380	13	5
protein phosphatase 1J [Homo sapiens]	SPDLPNAASAPPAAAPEAPR	950.48	UNIT	300.1	UNIT	5	380	37	5
protein phosphatase 1J [Homo sapiens]	SPDLPNAASAPPAAAPEAPR	950.48	UNIT	569.3	UNIT	5	380	33	5
protein phosphatase 1J [Homo sapiens]	SPDLPNAASAPPAAAPEAPR	950.48	UNIT	744.4	UNIT	5	380	29	5
protein phosphatase 1J [Homo sapiens]	SPDLPNAASAPPAAAPEAPR	950.48	UNIT	924.4	UNIT	5	380	21	5
protein phosphatase 1J [Homo sapiens]	SPDLPNAASAPPAAAPEAPR	950.48	UNIT	976.5	UNIT	5	380	37	5
protein phosphatase 1J [Homo sapiens]	SPDLPNAASAPPAAAPEAPR	950.48	UNIT	1134.6	UNIT	5	380	37	5
protein phosphatase 1J [Homo sapiens]	SPDLPNAASAPPAAAPEAPR	633.99	UNIT	300.1	UNIT	5	380	22	5
protein phosphatase 1J [Homo sapiens]	SPDLPNAASAPPAAAPEAPR	633.99	UNIT	569.3	UNIT	5	380	10	5
protein phosphatase 1J [Homo sapiens]	SPDLPNAASAPPAAAPEAPR	633.99	UNIT	744.4	UNIT	5	380	10	5
protein phosphatase 1J [Homo sapiens]	SPDLPNAASAPPAAAPEAPR	633.99	UNIT	879.5	UNIT	5	380	26	5
protein phosphatase 1J [Homo sapiens]	SPDLPNAASAPPAAAPEAPR	633.99	UNIT	924.4	UNIT	5	380	10	5
protein phosphatase 1J [Homo sapiens]	SPDLPNAASAPPAAAPEAPR	633.99	UNIT	976.5	UNIT	5	380	10	5
