# Supplementary material for: A survey of proteomic biomarkers for heterotopic ossification in blood serum
Source: J Orthop Surg Res. 2017 May 4;12:69. doi: 10.1186/s13018-017-0567-2 (PMC5418723; doi:10.1186/s13018-017-0567-2)
Supplement: Supplementary file 2 — iTRAQ serum gene ontology enrichment analysis. All proteins quantified in the serum via iTRAQ were analyzed using BiNGO and cytoscape on June 23, 2016. An over-representation analysis, hypergeometric test with a Benjamini & Hochberg False Discovery Rate (FDR) correction, was executed with a significance level of <0.05. (XLSX 130 kb) [file 13018_2017_567_MOESM2_ESM.xlsx]

## Sheet: GeneOntEnrich
GO-ID	p-value	corr p-value	x	n	X	N	Description	Genes in test set
9611	6.9354e-43	2.8935e-39	131	539	910	14228	response to wounding	FCN2|FCN3|PROS1|SERPINE1|TNC|F13A1|C4BPA|C4BPB|IL1RAP|ENO3|CLU|NDST1|C4A|LGALS1|CDH3|C1RL|IGFBP1|IGFBP4|HGF|KRT1|MIF|TICAM1|TPST1|LOX|MASP2|MASP1|S100A9|S100A8|CFB|CFD|CFI|PROZ|CFP|PLA2G7|KNG1|C2|C5|C6|ADAMTS13|C7|C9|APOH|S100A12|LTA4H|CD14|APOE|A2M|CD163|VCAM1|TGFB1|IGF1|GP6|PRDX6|GP5|TREML1|SELP|TF|VNN1|COL5A1|CDK5|HRG|SERPINA3|ORM1|B4GALT1|ITGB3|SERPINA10|MIA3|C8B|C8A|ORM2|C8G|NFKBIZ|OLR1|LBP|…
2526	3.1802e-40	6.6339e-37	53	90	910	14228	acute inflammatory response	SERPINA3|FCN2|ORM1|FCN3|B4GALT1|C4BPA|C4BPB|C8B|C8A|CLU|ORM2|C4A|C8G|C1RL|LBP|MBL2|AHSG|HGF|KRT1|APOA2|F2|F8|MASP2|MASP1|CFB|CFD|CRP|APCS|ITIH4|C1QA|C1S|C1R|CFI|CFP|C2|C5|C6|C7|C9|A2M|CD55|APOL3|CD163|VCAM1|F12|TF|VNN1|CFHR1|SAA1|CFHR5|SAA2|KLKB1|C1QC
2541	7.3641e-31	1.0241e-27	32	41	910	14228	activation of plasma proteins involved in acute inflammatory response	CFD|CRP|C1QA|FCN2|FCN3|C1S|C1R|CFI|C4BPA|C4BPB|C8B|CFP|C8A|CLU|C2|C4A|C5|C6|C8G|C7|C9|C1RL|CD55|MBL2|KRT1|TF|CFHR1|CFHR5|MASP2|MASP1|CFB|C1QC
6956	9.2827e-30	9.6819e-27	31	40	910	14228	complement activation	CFD|CRP|C1QA|FCN2|FCN3|C1S|C1R|CFI|C4BPA|C4BPB|C8B|CFP|C8A|CLU|C2|C4A|C5|C6|C8G|C7|C9|C1RL|CD55|MBL2|KRT1|CFHR1|CFHR5|MASP2|MASP1|CFB|C1QC
6954	3.3509e-29	2.796e-26	82	314	910	14228	inflammatory response	SERPINA3|FCN2|ORM1|FCN3|B4GALT1|C4BPA|C4BPB|IL1RAP|C8B|C8A|CLU|ORM2|NDST1|C4A|C8G|C1RL|NFKBIZ|OLR1|LBP|MBL2|AHSG|IGFBP4|HGF|PLA2G4C|KRT1|APOA2|MIF|F2|TICAM1|YWHAZ|TPST1|ATRN|F8|MASP2|MASP1|S100A9|S100A8|CD44|CFB|CFD|CRP|APCS|ITIH4|C1QA|C1S|C1R|CFI|CFP|PLA2G7|THBS1|KNG1|C2|C5|C6|C7|C9|ALOX5|PDPN|SPP1|S100A12|LTA4H|CD14|A2M|CD55|APOL3|AOC3|PLA2G2D|CD163|VCAM1|TGFB1|F12|PRDX6|SELP|TF|VNN1|CFHR1|SAA1…
6950	6.3135e-27	4.39e-24	227	1768	910	14228	response to stress	SPON2|PGLYRP2|POP1|SERPINE1|C4BPA|C4BPB|SMC3|ENO3|NDST1|C4A|LGALS1|RAP80|MED1|KRT1|RNASE6|HLA-B|MIF|SEPP1|PFN1|CFB|CFD|MAPKAP1|CFI|CFP|PLA2G7|C2|C5|C6|ADAMTS13|C7|C9|APOH|PRDX1|MYO6|S100A12|LTA4H|CD14|APOE|A2M|ATRIP|NHEJ1|MCTS1|EIF2AK1|EIF2AK4|IGF1|PPBP|GP6|PRDX6|GP5|TREML1|POLA1|TF|VNN1|HRG|SERPINA3|COL18A1|ORM1|SERPINA10|PCSK9|MIA3|BRCA2|C8B|KRT20|C8A|ORM2|C8G|PRX|REV3L|OLR1|CTSD|CAMP|AHSG|SFTP…
51605	1.2883e-26	7.6785e-24	40	81	910	14228	protein maturation by peptide bond cleavage	CFD|CRP|C1QA|FCN2|FCN3|C1S|C1R|CFI|PCSK9|C4BPA|C4BPB|C8B|CFP|C8A|CLU|C2|C4A|C5|C6|C8G|C7|C9|APOH|C1RL|PRSS3|CD55|MBL2|SRGN|F12|F11|KRT1|BACE2|TF|CFHR1|CFHR5|MASP2|MASP1|KLKB1|CFB|C1QC
6952	1.4631e-24	7.6299e-22	112	619	910	14228	defense response	SPON2|FCN2|CD84|FCMR|FCN3|PGLYRP2|POP1|SERPINE1|HP|C4BPA|C4BPB|IL1RAP|MPO|CLU|NDST1|C4A|TUBB1|C1RL|IGFBP4|HGF|KRT1|RNASE6|HLA-B|MIF|TICAM1|TPST1|MASP2|MASP1|PFN1|S100A9|S100A8|CFB|CFD|CFI|CFP|PLA2G7|KNG1|C2|C5|C6|C7|C9|PRDX1|S100A12|LTA4H|CD14|A2M|CD163|VCAM1|TGFB1|PPBP|PRDX6|TREML1|SELP|TF|VNN1|LCN2|ITGB1|LGALS3BP|SERPINA3|ORM1|B4GALT1|CALCOCO2|CRISP3|C8B|C8A|ORM2|C8G|NFKBIZ|OLR1|LBP|CAMP|MBL2|A…
51604	1.7889e-24	8.2926e-22	45	115	910	14228	protein maturation	CFD|CRP|C1QA|FCN2|FCN3|C1S|C1R|CFI|PCSK9|C4BPA|C4BPB|C8B|CFP|C8A|CLU|GLI3|C2|C4A|C5|C6|ADAMTS13|C8G|C7|C9|APOH|C1RL|AGA|PRSS3|CD55|MBL2|SRGN|F12|F11|KRT1|FKBP1A|BACE2|TF|CFHR1|CFHR5|MASP2|CALR|MASP1|KLKB1|CFB|C1QC
16485	2.2801e-23	9.5126e-21	42	105	910	14228	protein processing	CFD|CRP|C1QA|FCN2|FCN3|C1S|C1R|CFI|PCSK9|C4BPA|C4BPB|C8B|CFP|C8A|CLU|GLI3|C2|C4A|C5|C6|ADAMTS13|C8G|C7|C9|APOH|C1RL|PRSS3|CD55|MBL2|SRGN|F12|F11|KRT1|BACE2|TF|CFHR1|CFHR5|MASP2|MASP1|KLKB1|CFB|C1QC
6959	4.9337e-23	1.8712e-20	36	77	910	14228	humoral immune response	CFD|CRP|GPI|C1QA|FCN2|FCN3|C1S|TRAF3IP2|C1R|CFI|C4BPA|C4BPB|C8B|CFP|C8A|CLU|C2|C4A|C5|C6|C8G|C7|C9|C1RL|CD55|MBL2|ST6GAL1|HGF|KRT1|CFHR1|CFHR5|MASP2|MASP1|CFB|C1QC|LTF
7155	3.9294e-22	1.3661e-19	117	709	910	14228	cell adhesion	SPON2|APP|CD84|POP1|ITGA2B|HP|ICAM2|TNC|ICAM1|CDH6|COMP|CDH5|ISLR|ALCAM|CDH3|CDH1|TNN|DAG1|NRCAM|HABP2|POSTN|CD93|ACTN1|OMD|APLP1|HSPG2|PCDHA10|BCAM|AZGP1|IGFALS|DSC1|DSC2|VCL|DSC3|NID1|VTN|EFNB1|ADAMTS13|PCDHA5|VCAM1|CADM1|AMBP|GPR98|MCAM|AMBN|MSN|L1CAM|GP5|SELP|BMP1|VNN1|COL5A1|CDK5|SELL|CNTN1|COL20A1|CNTN3|SDK2|ITGB1|LGALS3BP|COL18A1|NRP2|ECM2|B4GALT1|ITGB3|LAMC1|PTPRF|CHL1|OLR1|LBP|ITGA4|VWF|…
22610	4.4322e-22	1.4224e-19	117	710	910	14228	biological adhesion	SPON2|APP|CD84|POP1|ITGA2B|HP|ICAM2|TNC|ICAM1|CDH6|COMP|CDH5|ISLR|ALCAM|CDH3|CDH1|TNN|DAG1|NRCAM|HABP2|POSTN|CD93|ACTN1|OMD|APLP1|HSPG2|PCDHA10|BCAM|AZGP1|IGFALS|DSC1|DSC2|VCL|DSC3|NID1|VTN|EFNB1|ADAMTS13|PCDHA5|VCAM1|CADM1|AMBP|GPR98|MCAM|AMBN|MSN|L1CAM|GP5|SELP|BMP1|VNN1|COL5A1|CDK5|SELL|CNTN1|COL20A1|CNTN3|SDK2|ITGB1|LGALS3BP|COL18A1|NRP2|ECM2|B4GALT1|ITGB3|LAMC1|PTPRF|CHL1|OLR1|LBP|ITGA4|VWF|…
6958	4.2818e-21	1.276e-18	22	29	910	14228	complement activation, classical pathway	CRP|C1QA|C1S|C1R|CFI|C4BPA|C4BPB|C8B|C8A|CLU|C2|C4A|C5|C6|C8G|C7|C9|C1RL|MASP2|CD55|MBL2|C1QC
48583	5.8295e-21	1.6214e-18	95	524	910	14228	regulation of response to stimulus	FCN2|FCN3|SERPINE1|C4BPA|C4BPB|C8B|C8A|CLU|PTPRF|ICAM1|C4A|C8G|C1RL|KDR|TRIM24|RAP80|LBP|PTGDS|B2M|MBL2|GPX1|AHSG|SERPINF1|HGF|ADIPOQ|SPINK5|KRT1|APOA2|APOA1|GP1BA|MIF|F2|TICAM1|OSMR|CREB3|RBP4|CACNB4|UBE2V2|CDH13|MASP2|RBCK1|MASP1|IL6ST|CD44|CFB|CFD|CRP|C1QA|CPB2|C1S|C1R|SERPINC1|CFI|PLG|CFP|THBS1|KNG1|THBS4|C2|HPX|VTN|C5|C6|C7|CNR2|C9|APOH|PRDX1|PDPN|SPP1|APOE|A2M|CD55|TGFB1|CADM1|AMBP|EIF2AK1|…
2682	1.2115e-20	3.1591e-18	83	423	910	14228	regulation of immune system process	FCN2|ORM1|FCN3|CSF1|SERPINE1|C4BPA|MIA3|C4BPB|C8B|C8A|CLU|ORM2|ICAM1|C4A|SART1|C8G|PNP|CA2|C1RL|LBP|B2M|MBL2|GPX1|HGF|ADIPOQ|SFTPD|SPINK5|KRT1|APOA2|NME2|APOA1|MIF|PDCD1LG2|TICAM1|NME1|RBP4|CACNB4|MASP2|RBCK1|MASP1|IL6ST|CD44|CFB|CFD|CRP|C1QA|C1S|C1R|LRRC17|CFI|CFP|THBS1|THBS4|C2|HPX|EFNB1|C5|C6|C7|CNR2|C9|CLPTM1|A2M|CD55|SNCA|SPEN|VCAM1|TGFB1|CADM1|AMBP|HIST1H4L|SOD1|FKBP1A|SELP|COL3A1|VNN1|FAP|…
42060	2.138e-20	5.2469e-18	54	199	910	14228	wound healing	B4GALT1|ITGB3|PROS1|SERPINE1|SERPINA10|F13A1|MIA3|C4BPB|ENO3|CDH3|IGFBP1|FGB|FGA|GPX1|VWF|HGF|MST1|FGG|GP1BA|F2|DCN|F5|F8|F9|MMRN1|LOX|CD44|ENG|SERPINC1|PROZ|PLG|LMAN1|ADAMTS13|C9|APOH|CD59|GSN|TGFB1|SERPIND1|F10|F12|F11|IGF1|GP6|GP5|TREML1|COL3A1|TF|COL5A1|SAA1|SAA2|HRG|KLKB1|PF4
45087	2.5107e-20	5.8192e-18	49	166	910	14228	innate immune response	SPON2|FCN2|FCN3|PGLYRP2|POP1|CALCOCO2|CRISP3|C4BPA|C4BPB|IL1RAP|C8B|C8A|CLU|C4A|C8G|TUBB1|C1RL|LBP|MBL2|SFTPD|KRT1|MIF|TICAM1|MASP2|MASP1|CFB|CFD|C1QA|C1S|C1R|CFI|CFP|C2|C5|C6|C7|C9|PRDX1|CD14|APOL1|CD55|SNCA|TGFB1|F12|TREML1|VNN1|LCN2|CFHR5|C1QC
2455	4.8893e-20	1.0736e-17	22	31	910	14228	humoral immune response mediated by circulating immunoglobulin	CRP|C1QA|C1S|C1R|CFI|C4BPA|C4BPB|C8B|C8A|CLU|C2|C4A|C5|C6|C8G|C7|C9|C1RL|MASP2|CD55|MBL2|C1QC
50817	1.2376e-19	2.4588e-17	38	104	910	14228	coagulation	SERPINC1|ITGB3|PROS1|PROZ|F13A1|PLG|C4BPB|LMAN1|ADAMTS13|C9|APOH|CD59|FGB|FGA|SERPIND1|F10|VWF|F12|HGF|MST1|F11|FGG|GP1BA|F2|GP6|GP5|F5|TREML1|F8|COL3A1|TF|F9|MMRN1|SAA1|SAA2|HRG|KLKB1|PF4
7596	1.2376e-19	2.4588e-17	38	104	910	14228	blood coagulation	SERPINC1|ITGB3|PROS1|PROZ|F13A1|PLG|C4BPB|LMAN1|ADAMTS13|C9|APOH|CD59|FGB|FGA|SERPIND1|F10|VWF|F12|HGF|MST1|F11|FGG|GP1BA|F2|GP6|GP5|F5|TREML1|F8|COL3A1|TF|F9|MMRN1|SAA1|SAA2|HRG|KLKB1|PF4
7599	1.4151e-19	2.6835e-17	39	110	910	14228	hemostasis	GPI|SERPINC1|ITGB3|PROS1|PROZ|F13A1|PLG|C4BPB|LMAN1|ADAMTS13|C9|APOH|CD59|FGB|FGA|SERPIND1|F10|VWF|F12|HGF|MST1|F11|FGG|GP1BA|F2|GP6|GP5|F5|TREML1|F8|COL3A1|TF|F9|MMRN1|SAA1|SAA2|HRG|KLKB1|PF4
2252	1.6371e-18	2.9696e-16	41	129	910	14228	immune effector process	CFD|CRP|FCN1|C1QA|FCN2|FCN3|C1S|TRAF3IP2|C1R|CFI|C4BPA|C4BPB|DBH|C8B|CFP|C8A|CLU|C2|ICAM1|C4A|C5|C6|C8G|C7|C9|PRDX1|TUBB1|C1RL|LBP|CD55|MBL2|HGF|KRT1|TICAM1|YWHAZ|CFHR1|CFHR5|MASP2|MASP1|CFB|C1QC
2253	3.7616e-18	6.5389e-16	35	96	910	14228	activation of immune response	CFD|CRP|C1QA|FCN2|FCN3|C1S|C1R|CFI|C4BPA|C4BPB|C8B|CFP|C8A|CLU|C2|C4A|C5|C6|C8G|C7|C9|C1RL|CD55|MBL2|KRT1|TICAM1|CACNB4|CFHR1|UBE2N|CFHR5|MASP2|RBCK1|MASP1|CFB|C1QC
50878	7.9462e-18	1.3261e-15	43	147	910	14228	regulation of body fluid levels	GPI|SERPINC1|ITGB3|PROS1|SLC22A2|PROZ|F13A1|PLG|C4BPB|CPN2|KNG1|LMAN1|ADAMTS13|C9|APOH|CD59|FGB|FGA|SERPIND1|F10|VWF|F12|HGF|MST1|F11|FGG|GP1BA|F2|GP6|GP5|F5|TREML1|F8|COL3A1|TF|F9|MMRN1|FAP|SAA1|SAA2|HRG|KLKB1|PF4
65008	1.1577e-16	1.8576e-14	180	1539	910	14228	regulation of biological quality	APP|CSF1|POP1|PROS1|SERPINE1|HP|TNC|F13A1|C4BPB|ENO1|PARK7|CRHBP|RPS17|TNN|CFL1|KDR|TRIM24|DAG1|OBFC1|SLC34A3|IGFBP1|PDIA3|MED1|SLC30A5|HGF|ADIPOQ|SLC9A2|RBP4|CACNB4|RFX6|IL6ST|TLN1|DSC1|DSC2|DSC3|FTL|SPTBN4|SPTBN5|SLC22A2|IREB2|EIF5A2|PROZ|TXN|ACAT2|ACACA|KNG1|HSP90B1|CPLX3|HPX|ADH4|ADAMTS13|APOM|C7|C9|APOH|PRDX1|LARGE|MYO6|APOE|APOB|SKIL|SPTBN1|ABCA2|TGFB1|GOT1|HBG1|ARPC5|IGF1|GP6|CP|PRDX6|GP5|…
48518	2.1792e-16	3.3673e-14	233	2203	910	14228	positive regulation of biological process	APP|TRAF3IP2|POP1|SERPINE1|C4BPA|C4BPB|ICAM1|PSMD9|C4A|LGALS1|PNP|CAPNS1|KDR|FBXO5|RAP80|B2M|SKP1|MED1|SAP30BP|SERPINF1|DAPK3|KRT1|MIF|HCFC1|TIAM1|RBP4|RFX6|RBCK1|HPRT1|CFB|CFD|SPTBN4|SDC4|CFI|EIF5A2|CFP|C2|HPX|C5|C6|C7|C9|APOH|TSPAN6|PRDX1|MYO6|S100A12|CD14|APOE|APOB|MCTS1|CADM1|IGF1|PPBP|L1CAM|TF|VNN1|CALR|HRG|ITM2B|COL18A1|ECM1|ECM2|PCSK9|HBB|MIA3|PRL|BRCA2|C8B|C8A|PTPRF|GLI3|AKAP12|C8G|PPP2R4…
50778	1.3716e-15	2.0436e-13	40	146	910	14228	positive regulation of immune response	CFD|CRP|C1QA|FCN2|FCN3|C1S|C1R|CFI|C4BPA|C4BPB|C8B|CFP|C8A|CLU|C2|HPX|C4A|C5|C6|C8G|C7|C9|C1RL|LBP|B2M|CD55|MBL2|CADM1|KRT1|TICAM1|CACNB4|CFHR1|UBE2N|CFHR5|MASP2|RBCK1|MASP1|IL6ST|CFB|C1QC
50776	1.4247e-15	2.0496e-13	52	235	910	14228	regulation of immune response	FCN2|FCN3|C4BPA|C4BPB|C8B|C8A|CLU|ICAM1|C4A|C8G|C1RL|LBP|B2M|MBL2|GPX1|HGF|SPINK5|KRT1|APOA2|APOA1|TICAM1|RBP4|CACNB4|MASP2|RBCK1|MASP1|IL6ST|CFB|CFD|CRP|C1QA|C1S|C1R|CFI|CFP|C2|HPX|C5|C6|C7|C9|A2M|CD55|TGFB1|CADM1|AMBP|FKBP1A|COL3A1|CFHR1|UBE2N|CFHR5|C1QC
32101	2.7011e-15	3.7563e-13	46	192	910	14228	regulation of response to external stimulus	CPB2|SERPINC1|SERPINE1|PLG|THBS1|KNG1|THBS4|VTN|C5|C6|C7|CNR2|APOH|PDPN|SPP1|KDR|TRIM24|APOE|LBP|A2M|GPX1|TGFB1|AHSG|SERPINF1|F12|HGF|ADIPOQ|F11|KRT1|GP1BA|F2|OSMR|AGT|SELP|CREB3|TF|FABP4|PROC|SCGB1A1|SAA1|SAA2|CDH13|MASP1|HRG|IL6ST|KLKB1
2684	3.3829e-15	4.5527e-13	55	264	910	14228	positive regulation of immune system process	FCN2|FCN3|SERPINE1|C4BPA|MIA3|C4BPB|C8B|C8A|CLU|ICAM1|C4A|SART1|C8G|PNP|C1RL|LBP|B2M|MBL2|HGF|KRT1|MIF|PDCD1LG2|TICAM1|CACNB4|MASP2|RBCK1|MASP1|IL6ST|CFB|CFD|CRP|C1QA|C1S|C1R|CFI|CFP|THBS1|THBS4|C2|HPX|EFNB1|C5|C6|C7|C9|CD55|VCAM1|TGFB1|CADM1|SELP|VNN1|CFHR1|UBE2N|CFHR5|C1QC
6928	9.2124e-15	1.2011e-12	78	477	910	14228	cellular component movement	ITGB1|SPON2|APP|NRP2|B4GALT1|ITGB3|LAMC1|DBH|GLI3|ICAM1|ACTG1|ALCAM|CAPZB|TNN|CFL1|TUBB1|ARHGDIB|ENPP2|ARFIP2|NRCAM|LBP|PRSS3|CAP1|GPX1|ITGA4|TPM4|TPM3|KRT2|HGF|ITGA1|SFTPD|APOA1|ARID5B|MIF|CEACAM1|ELMO1|B3GNT2|MYH9|CDH13|ANG|TLN1|S100A9|CD44|VCL|PAFAH1B1|ENG|LAMA5|ENPEP|DNAH9|TXN|THBS1|EGFR|THBS4|EFNB1|APOB|DISC1|VCAM1|TGFB1|LAMB2|MSN|ARPC5|IGF1|L1CAM|BMP7|EXT1|SELP|CCDC88A|VNN1|COL5A1|CDK5|FAP|…
42221	1.8452e-14	2.3328e-12	167	1463	910	14228	response to chemical stimulus	PDCD6|SERPINE1|HP|TNC|PARK7|MPO|ENO3|CLU|UBE2L3|LGALS1|CDH3|PNP|SCN11A|CDH1|CFL1|ENPP2|DAG1|B2M|SLC34A3|IGFBP1|TPM4|SLC30A5|SERPINF1|HGF|ADIPOQ|IGFBP2|KRT1|MIF|ACSL3|RNASE2|TICAM1|SEPP1|RBP4|LOX|IL6ST|PFN1|S100A9|S100A8|CES1|CUTA|CPB2|VCP|ACAT2|ACACA|HSP90B1|ADH4|C5|APOM|C7|C9|PRDX1|S100A12|LTA4H|CD14|APOE|APOB|A2M|SKIL|ABCA2|SLC14A2|VCAM1|TGFB1|GOT1|HSPA5|HBG1|HSPA4|EIF2AK1|GGH|EIF2AK4|PPBP|BMP7…
48584	2.2446e-14	2.7542e-12	54	267	910	14228	positive regulation of response to stimulus	FCN2|FCN3|SERPINE1|C4BPA|C4BPB|C8B|C8A|CLU|C4A|C8G|C1RL|KDR|RAP80|LBP|B2M|MBL2|HGF|KRT1|TICAM1|OSMR|CREB3|CACNB4|CDH13|MASP2|RBCK1|MASP1|IL6ST|CFB|CFD|CRP|C1QA|C1S|C1R|CFI|CFP|THBS1|THBS4|C2|HPX|VTN|C5|C6|C7|C9|CD55|TGFB1|CADM1|AGT|TF|FABP4|CFHR1|UBE2N|CFHR5|C1QC
2449	2.4054e-14	2.8673e-12	25	63	910	14228	lymphocyte mediated immunity	CRP|C1QA|C1S|C1R|CFI|C4BPA|C4BPB|C8B|C8A|CLU|C2|ICAM1|C4A|C5|C6|C8G|C7|C9|PRDX1|TUBB1|C1RL|CD55|MBL2|MASP2|C1QC
2376	2.911e-14	3.3735e-12	122	948	910	14228	immune system process	FCN1|SPON2|FCN2|FCN3|PGLYRP2|CSF1|TRAF3IP2|POP1|C4BPA|C4BPB|IL1RAP|CLU|ICAM1|C4A|PNP|TUBB1|ARHGDIB|C1RL|KDR|ENPP2|B2M|RAG1|MED1|ST6GAL1|CD93|IL1R2|HGF|KRT1|HLA-B|MIF|TICAM1|CHIT1|AZGP1|CACNB4|MASP2|RBCK1|MASP1|S100A9|CFB|CFD|NOTCH4|CFI|CFP|C2|VTN|C5|C6|C7|C9|PRDX1|CD14|SKIL|NHEJ1|VCAM1|TGFB1|MSN|PPBP|TREML1|SELP|VNN1|LCN2|UBE2N|CALR|ITGB1|GPI|B4GALT1|CALCOCO2|CRISP3|CTSW|DBH|BRCA2|C8B|TAZ|C8A|FCG…
50896	4.9752e-14	5.6099e-12	330	3620	910	14228	response to stimulus	SPON2|APP|PGLYRP2|TRAF3IP2|POP1|SERPINE1|C4BPA|C4BPB|ENO1|SMC3|ENO3|UBE2L3|ICAM1|CRHBP|NDST1|C4A|LGALS1|PNP|SCN11A|DAG1|RAP80|HMCN1|PTGDS|B2M|SLC34A3|MED1|ST6GAL1|SERPINF1|IL1R2|KRT1|RNASE6|HLA-B|CACNA2D4|MIF|MYO7A|ACSL3|RNASE2|SEPP1|CHIT1|RBP4|AZGP1|HPRT1|PFN1|CFB|CES1|CFD|CUTA|OR8G1|SPTBN4|MAPKAP1|CFI|CFP|PLA2G7|C2|ADH4|C5|LDHA|C6|ADAMTS13|APOM|C7|C9|APOH|PRDX1|MYO6|S100A12|LTA4H|CD14|APOE|APOB…
16064	6.6795e-14	7.3334e-12	22	50	910	14228	immunoglobulin mediated immune response	CRP|C1QA|C1S|C1R|CFI|C4BPA|C4BPB|C8B|C8A|CLU|C2|C4A|C5|C6|C8G|C7|C9|C1RL|MASP2|CD55|MBL2|C1QC
2443	8.4347e-14	9.023e-12	28	83	910	14228	leukocyte mediated immunity	CRP|C1QA|C1S|C1R|CFI|C4BPA|C4BPB|DBH|C8B|C8A|CLU|C2|ICAM1|C4A|C5|C6|C8G|C7|C9|PRDX1|TUBB1|C1RL|CD55|MBL2|HGF|YWHAZ|MASP2|C1QC
19724	1.1046e-13	1.152e-11	22	51	910	14228	B cell mediated immunity	CRP|C1QA|C1S|C1R|CFI|C4BPA|C4BPB|C8B|C8A|CLU|C2|C4A|C5|C6|C8G|C7|C9|C1RL|MASP2|CD55|MBL2|C1QC
16043	2.6832e-13	2.7303e-11	249	2555	910	14228	cellular component organization	ITSN2|SPON2|APP|RNH1|POP1|SMC3|FNBP1L|CCT6B|PSMD9|ALCAM|TRIM24|DAG1|OBFC1|ARFIP2|FBXO5|RAP80|MED1|ACTN1|DAPK3|MIF|MYO7A|MED4|ANK1|KRT9|RBP4|DAAM2|KCNQ5|HPRT1|PFN1|TLN1|SPTBN4|SPTBN5|NCAPH|APOM|C9|ZNHIT6|MYO6|CD14|APOE|APOB|CADM1|HIST1H4L|RAB3IP|L1CAM|EXT1|CCDC88A|COL1A2|CALR|HRG|PAM|COL18A1|NRP2|AHCTF1|ECM2|HEXB|DENND1A|CLTC|GPT|BRCA2|KRT20|GLI3|KIF15|ASGR2|SERPINA5|SMG6|MRC2|C1QTNF1|CHL1|TMSB4X|…
30193	3.4714e-13	3.4482e-11	19	39	910	14228	regulation of blood coagulation	CPB2|F12|SERPINE1|F11|KRT1|PLG|GP1BA|F2|THBS1|KNG1|SELP|VTN|TF|PROC|APOH|PDPN|APOE|HRG|KLKB1
6957	1.6631e-12	1.6136e-10	12	15	910	14228	complement activation, alternative pathway	CFD|C4A|C5|C8G|C7|C9|CFHR5|C8B|CFP|C8A|CFB|C2
50818	3.1552e-12	2.9252e-10	19	43	910	14228	regulation of coagulation	CPB2|F12|SERPINE1|F11|KRT1|PLG|GP1BA|F2|THBS1|KNG1|SELP|VTN|TF|PROC|APOH|PDPN|APOE|HRG|KLKB1
61041	3.1552e-12	2.9252e-10	19	43	910	14228	regulation of wound healing	CPB2|F12|SERPINE1|F11|KRT1|PLG|GP1BA|F2|THBS1|KNG1|SELP|VTN|TF|PROC|APOH|PDPN|APOE|HRG|KLKB1
8152	3.8422e-12	3.4847e-10	479	5930	910	14228	metabolic process	PRSS1|PGLYRP2|RNH1|POP1|C4BPA|C4BPB|ENO1|SMC3|RPL8|ENO3|CRHBP|NDST1|PSMD9|CAPNS1|LIPN|OBFC1|PIP4K2C|PRSS3|MED1|SECISBP2|DAPK3|RNASE6|RNASE2|MED4|HCFC1|RBP4|BCAM|MTHFD1|HECW1|FAR1|RBCK1|HPRT1|HPD|GPLD1|CFB|EXD1|CFD|ENPEP|CFI|HPR|CFP|PLA2G7|C2|HPX|ADH4|LDHB|C5|LDHA|C6|ADAMTS13|C7|C9|PRDX1|S100A12|ST3GAL5|LTA4H|ATRIP|NHEJ1|ABCA2|EIF2AK1|FUCA2|EIF2AK4|PGA3|CP|PRDX6|BHMT|FASN|PAM|PGCP|GPI|HEXB|CLTC|GP…
9056	1.0201e-11	9.0547e-10	120	1007	910	14228	catabolic process	PGLYRP2|RNH1|POP1|UBE3A|ENO1|MPO|ENO3|UBE2L3|PSMD9|PNP|LAMP1|CDH1|LIPN|ENPP2|SKP1|MED1|USP8|ANAPC7|ADIPOQ|RNASE6|TALDO1|RNASE2|PGD|CHIT1|BCAM|AZGP1|MTHFD1|UBE2V2|RBCK1|HPD|SLC27A2|VCP|H6PD|PLA2G7|HSP90B1|ADH4|LDHB|LDHA|C6|ADAMTS13|PRDX1|PGK1|APOE|APOB|PDHA2|TGFB1|GOT1|AMBP|HSPA5|PRDX6|CPS1|CDK5|UBE2N|GPI|USP38|HEXB|PCSK9|DBH|SMG6|GM2A|PRX|LBP|CTBS|CTSD|DFFA|TPI1|GPX1|GPX3|PGAM1|PLA2G4C|AKR1A1|APO…
6955	1.0802e-11	9.3886e-10	85	618	910	14228	immune response	FCN1|SPON2|GPI|FCN2|FCN3|PGLYRP2|TRAF3IP2|POP1|CALCOCO2|CRISP3|C4BPA|CTSW|C4BPB|IL1RAP|DBH|C8B|C8A|CLU|ICAM1|C4A|FCGR3B|C8G|PNP|TUBB1|ARHGDIB|C1RL|ENPP2|LBP|B2M|MBL2|RAG1|ST6GAL1|IL1R2|HGF|SFTPD|KRT1|HLA-B|MIF|PDCD1LG2|TICAM1|YWHAZ|CHIT1|AZGP1|OAS1|MASP2|LCP1|MASP1|CFB|LTF|CFD|CCL14|CRP|C1QA|C1S|C1R|CFI|CFP|THBS1|FYB|C2|CPN1|VTN|C5|C6|C7|CNR2|C9|PRDX1|CD14|APOL1|CD55|SNCA|TGFB1|F12|SUSD2|PPBP|TRE…
48731	1.359e-11	1.1571e-09	232	2419	910	14228	system development	SPON2|APP|SPARC|POP1|SERPINE1|ENO3|FGFRL1|NDST1|LGALS1|ALCAM|ANPEP|KDR|DAG1|MED1|SERPINF1|KRT2|DAPK3|KRT1|MIF|MYO7A|ACSL3|HSPG2|DKK3|KRT9|TIAM1|RBP4|BCAM|BTD|RFX6|MYL1|TAGLN2|PFN1|ZFPM1|SPTBN4|ENPEP|C7|APOH|PRDX1|MYO6|PCDHA5|LTA4H|APOE|APOB|NHEJ1|CADM1|IGF1|L1CAM|EXT1|EXT2|CCDC88A|COL1A2|CALR|HRG|PAM|SIM2|ITM2B|GPI|COL18A1|ECM1|NRP2|HEXB|CTSZ|SERPINA10|PCSK9|PRL|BRCA2|PTPRF|GLI3|CHL1|PRX|TIMP2|SD…
6508	1.6266e-11	1.3573e-09	95	731	910	14228	proteolysis	PGCP|CPM|PRSS1|USP38|ACY1|POP1|CTSZ|HP|PCSK9|CTSW|UBE3A|PEPD|CNDP1|UBE2L3|PSMD9|CAPNS1|CDH1|ANPEP|SCRN3|C1RL|OLR1|CTSF|PRSS3|CTSD|ADAMTS6|HGFAC|HABP2|SKP1|CAP1|USP8|ANAPC7|OVCH1|MMP2|HGF|MST1|RAD23A|F2|UCHL3|MMP9|PSMA6|BACE2|PSMA3|PSMA4|F9|MMP13|FOLH1|PSMA1|PSMA2|MYH9|MASP2|RBCK1|MASP1|CFB|PCYOX1|CFD|CPB2|VCP|ENPEP|CPB1|C1S|C1R|CFI|PROZ|PRCP|PLG|HPR|PSMA7|C2|HSP90B1|CPN1|PSMB6|C6|ADAMTS13|PSMB5|N…
2460	2.6115e-11	2.1363e-09	23	70	910	14228	adaptive immune response based on somatic recombination of immune receptors built from immunoglobulin superfamily domains	CRP|C1QA|C1S|C1R|CFI|C4BPA|C4BPB|C8B|C8A|CLU|C2|ICAM1|C4A|C5|C6|C8G|C7|C9|C1RL|MASP2|CD55|MBL2|C1QC
48856	2.8886e-11	2.3176e-09	248	2652	910	14228	anatomical structure development	SPON2|APP|SPARC|POP1|SERPINE1|ENO3|FGFRL1|NDST1|LGALS1|ALCAM|ANPEP|KDR|DAG1|FBXO5|MED1|SERPINF1|KRT2|DAPK3|KRT1|MIF|MYO7A|ACSL3|HSPG2|DKK3|KRT9|TIAM1|RBP4|BCAM|BTD|RFX6|MYL1|TAGLN2|PFN1|ZFPM1|SPTBN4|ENPEP|SDC4|C7|APOH|PRDX1|MYO6|PCDHA5|LTA4H|APOE|APOB|NHEJ1|CADM1|MCAM|RAB3IP|IGF1|L1CAM|EXT1|EXT2|CCDC88A|COL1A2|CALR|HRG|PAM|SIM2|ITM2B|GPI|COL18A1|ECM1|NRP2|HEXB|CTSZ|SERPINA10|PCSK9|HBB|PRL|BRCA2|P…
10035	3.2768e-11	2.5794e-09	45	237	910	14228	response to inorganic substance	CUTA|PDCD6|SERPINE1|TNC|LCAT|PARK7|MPO|THBS1|EGFR|TTN|MB|CA2|CDH1|PRDX1|PRX|OLR1|LTA4H|APOE|APOB|A2M|B2M|SNCA|SLC34A3|FGB|FGA|GSN|GPX1|GPX3|SLC30A5|GSS|IGFBP2|FGG|GGH|SOD2|SOD3|PRDX6|SOD1|ACTA1|TF|GCLC|CAT|KRT14|ALDOB|CRYAA|CRYAB
51346	3.3842e-11	2.6146e-09	21	59	910	14228	negative regulation of hydrolase activity	CSTB|ECM1|GPX1|HSPA5|SORT1|SERPINE1|APOA2|APOA1|APOC3|CST6|THBS1|FKBP1A|CST3|VTN|PPP2R4|APOC1|ANGPTL3|CRYAA|CRYAB|RAG1|SNCA
2250	3.6323e-11	2.7552e-09	23	71	910	14228	adaptive immune response	CRP|C1QA|C1S|C1R|CFI|C4BPA|C4BPB|C8B|C8A|CLU|C2|ICAM1|C4A|C5|C6|C8G|C7|C9|C1RL|MASP2|CD55|MBL2|C1QC
16477	4.6468e-11	3.4525e-09	50	284	910	14228	cell migration	ITGB1|NRP2|B4GALT1|ITGB3|LAMC1|DBH|ICAM1|TNN|CFL1|NRCAM|LBP|PRSS3|CAP1|GPX1|ITGA4|KRT2|HGF|ITGA1|SFTPD|APOA1|ARID5B|MIF|CEACAM1|MYH9|CDH13|ANG|S100A9|CD44|PAFAH1B1|ENG|LAMA5|ENPEP|THBS1|EGFR|THBS4|EFNB1|DISC1|VCAM1|TGFB1|LAMB2|MSN|SELP|CCDC88A|COL5A1|CDK5|FAP|SAA1|SAA2|S100P|PF4
51239	4.7169e-11	3.4525e-09	123	1066	910	14228	regulation of multicellular organismal process	APP|RNH1|CSF1|POP1|SERPINE1|TNC|LGALS1|PNP|CDH1|NRCAM|PTGDS|MED1|TPM3|SERPINF1|HGF|ADIPOQ|SPINK5|KRT1|MIF|TICAM1|TIAM1|RBP4|IL6ST|SPTBN4|CPB2|SDC4|NOTCH4|KNG1|CPLX3|VTN|C5|C6|C7|APOH|MYO6|CD14|APOE|SKIL|TGFB1|CADM1|HIST1H4L|IGF1|BMP7|EFNA1|SELP|CCDC88A|TF|BMP1|PROC|VNN1|CPS1|CDK5|PLXNB2|CALR|HRG|FGFR1|ECM1|FLT1|B4GALT1|ITGB3|PCSK9|PRL|DBH|BRCA2|TAZ|PTPRF|GLI3|GHR|SART1|CA2|TIMP2|NEFM|LBP|CAMP|YWH…
6953	5.7966e-11	4.1695e-09	17	39	910	14228	acute-phase response	CRP|APCS|ITIH4|SERPINA3|CD163|ORM1|AHSG|HGF|F2|ORM2|F8|SAA1|SAA2|LBP|A2M|APOL3|MBL2
19538	1.1582e-10	8.1899e-09	242	2606	910	14228	protein metabolic process	APP|PRSS1|POP1|C4BPA|C4BPB|RPL8|UBE2L3|CCT6B|PSMD9|C4A|RPS17|CAPNS1|ANPEP|RPS6KA2|KDR|TRIM24|RAP80|HMCN1|PRSS3|HABP2|SKP1|ST6GAL1|SECISBP2|DAPK3|KRT1|HECW1|RBCK1|CFB|CFD|ENPEP|CFI|EIF5A2|HPR|CFP|TTBK1|C2|TTBK2|HPX|C5|C6|ADAMTS13|C7|C9|APOH|ST3GAL5|LTA4H|SPTBN1|CTSA|EIF2AK1|EIF2AK4|PGA3|BHMT|TF|CALR|CTRC|PAM|PGCP|ACY1|HEXB|CTSZ|PCSK9|CTSW|GPT|PEPD|C8B|C8A|PTPRF|GLI3|C8G|RARS|OLR1|QSOX1|CTSF|CTSD|C…
32879	1.4932e-10	1.0383e-08	92	727	910	14228	regulation of localization	COL18A1|FLT1|B4GALT1|CSF1|POP1|ITGB3|ZC3H3|SERPINE1|HP|TNC|PCSK9|MIA3|DBI|TAZ|KRT20|GLI3|ICAM1|PSMD9|CDH1|KDR|ENPP2|DAG1|MBL2|SRGN|IGFBP5|AHSG|ACTN1|SLC30A5|HGF|ADIPOQ|SFTPD|APOA2|APOA1|MIF|F2|MMP9|CREB3|RBP4|CACNB4|RFX6|ANGPTL3|CDH13|ANG|LCP1|CRYAA|IL6ST|CRYAB|VCL|CRP|LAMA5|LRP1|LAMA2|PON1|TXN|THBS1|EGFR|THBS4|CPLX3|VTN|C5|P2RY6|C7|APOH|PRDX1|MYO6|PDPN|FLNA|APOE|APOB|SNCA|ABCA2|TGFB1|CADM1|F10|A…
44238	1.6689e-10	1.1414e-08	427	5266	910	14228	primary metabolic process	PRSS1|PGLYRP2|RNH1|POP1|C4BPA|C4BPB|ENO1|SMC3|RPL8|ENO3|NDST1|PSMD9|CAPNS1|LIPN|OBFC1|PIP4K2C|PRSS3|MED1|SECISBP2|DAPK3|RNASE6|RNASE2|MED4|HCFC1|RBP4|BCAM|MTHFD1|HECW1|FAR1|RBCK1|HPRT1|HPD|GPLD1|CFB|EXD1|CFD|ENPEP|CFI|HPR|CFP|PLA2G7|C2|HPX|ADH4|LDHB|C5|LDHA|C6|ADAMTS13|C7|C9|ST3GAL5|LTA4H|ATRIP|NHEJ1|ABCA2|EIF2AK1|FUCA2|EIF2AK4|PGA3|PRDX6|BHMT|FASN|PAM|PGCP|GPI|HEXB|GPT|SERPINA6|GLI3|SMG6|CHL1|RA…
30198	2.2333e-10	1.5028e-08	27	104	910	14228	extracellular matrix organization	APP|COL18A1|ECM2|B4GALT1|PLG|LAMC1|NID1|CST3|VTN|EGFLAM|POSTN|LAMB2|LUM|SPINK5|APLP1|XB|MMP9|AGT|DCN|FKBP1A|COL3A1|COL1A2|COL5A1|LOX|COL6A2|TGFBI|ENG
51247	2.5977e-10	1.7067e-08	51	307	910	14228	positive regulation of protein metabolic process	CSF1|ITGB3|HP|GHR|RPS4X|PSMD9|PPP2R4|CDH1|FBXO5|CAMP|SKP1|EIF5A|ANAPC7|HGF|ADIPOQ|MIF|F2|TICAM1|PSMA6|PSMA3|PSMA4|PSMA1|PSMA2|CRYAA|IL6ST|CD44|ENG|VCP|EIF5A2|THBS1|PSMA7|THBS4|PSMB6|HPX|VTN|C6|PSMB5|PSMB3|PSMB1|APOE|TGFB1|HSPA5|F12|IGF1|BMP7|AGT|FKBP1A|GCLC|UBE2N|CLC|KLKB1
51917	2.6181e-10	1.7067e-08	10	13	910	14228	regulation of fibrinolysis	CPB2|APOH|F12|SERPINE1|F11|PLG|HRG|F2|KLKB1|THBS1
9653	2.9004e-10	1.8616e-08	133	1217	910	14228	anatomical structure morphogenesis	SPON2|APP|CSF1|PLXND1|POP1|SERPINE1|HP|TNC|ENO3|CLU|FGFRL1|COMP|NDST1|ALCAM|CDH1|TNN|ANPEP|CFL1|KDR|DAG1|NRCAM|IGFBP1|MED1|LIG1|HGF|APLP1|ARID5B|MIF|MYO7A|HSPG2|DKK3|RBP4|OLFM3|BTD|S100A6|S100A4|PFN1|VCL|SPTBN4|ENPEP|NOTCH4|KNG1|EFNB1|APOH|MYO6|APOE|APOB|SKIL|VCAM1|TGFB1|HSPA5|MCAM|AMBN|RAB3IP|IGF1|L1CAM|BMP7|IGF2R|EXT1|EFNA1|SELP|EXT2|PTPRB|GCLC|COL1A2|BMP1|COL5A1|CDK5|CSPG4|PAM|FGFR1|GPI|CPM|CO…
65007	3.1945e-10	2.0193e-08	533	6918	910	14228	biological regulation	ITSN2|RNH1|ZNF174|POP1|SERPINE1|C4BPA|C4BPB|ENO1|SMC3|FGFRL1|CRHBP|NDST1|PSMD9|ALCAM|CAPNS1|OBFC1|MED1|SAP30BP|SERPINF1|DAPK3|MED4|SND1|HCFC1|DKK3|RBP4|BCAM|RFX6|SPARCL1|RBCK1|HPRT1|CFB|CFD|CFI|CFP|C2|HPX|ADH4|C5|C6|ADAMTS13|C7|C9|PRDX1|MYO6|S100A12|RSU1|ATRIP|NHEJ1|MCTS1|ABCA2|CADM1|EIF2AK1|EIF2AK4|L1CAM|ZNF35|GP6|CP|PRDX6|GP5|TREML1|BHMT|COL1A2|HRG|PAM|SERPINA3|GPI|HEXB|ARHGAP1|ZNF44|SERPINA6|G…
30195	3.5551e-10	2.2137e-08	13	24	910	14228	negative regulation of blood coagulation	F12|SERPINE1|F11|KRT1|PLG|GP1BA|F2|KNG1|VTN|PROC|APOH|APOE|KLKB1
32270	3.6343e-10	2.2298e-08	49	291	910	14228	positive regulation of cellular protein metabolic process	CSF1|ITGB3|HP|GHR|RPS4X|PSMD9|PPP2R4|CDH1|FBXO5|CAMP|SKP1|EIF5A|ANAPC7|HGF|ADIPOQ|MIF|F2|TICAM1|PSMA6|PSMA3|PSMA4|PSMA1|PSMA2|CRYAA|IL6ST|CD44|ENG|VCP|EIF5A2|THBS1|PSMA7|THBS4|PSMB6|HPX|VTN|C6|PSMB5|PSMB3|PSMB1|APOE|TGFB1|HSPA5|IGF1|BMP7|AGT|FKBP1A|GCLC|UBE2N|CLC
43062	4.6364e-10	2.8033e-08	34	161	910	14228	extracellular structure organization	APP|COL18A1|ECM2|B4GALT1|TNC|PLG|LAMC1|NID1|CST3|VTN|EGFLAM|CDH1|MYO6|NRCAM|POSTN|CADM1|LAMB2|LUM|SPINK5|APLP1|XB|MMP9|AGT|DCN|FKBP1A|CACNB2|COL3A1|COL1A2|CACNB4|COL5A1|LOX|COL6A2|TGFBI|ENG
48513	7.5761e-10	4.5154e-08	177	1790	910	14228	organ development	APP|CSF1|PLXND1|POP1|SERPINE1|HP|TNC|UBE3A|ENO3|CLU|FGFRL1|COMP|NDST1|CDH5|CDH1|BASP1|ANPEP|CFL1|KDR|DAG1|RAG1|IGFBP1|MED1|POSTN|IGFBP5|TPM3|SERPINF1|KRT2|HGF|SPINK5|KRT1|APLP1|ARID5B|MIF|MYO7A|ACSL3|PGD|HSPG2|FOXP2|DKK3|KRT9|MINPP1|CACNB2|RBP4|BCAM|OLFM3|BTD|CACNB4|RFX6|LOX|MYL1|S100A4|TAGLN2|UTRN|PFN1|DSC1|ZFPM1|VCL|ENPEP|NOTCH4|NID1|EFNB1|C7|MAN2A1|APOH|MYO6|LTA4H|APOE|APOB|SKIL|NHEJ1|VCAM1|TG…
51674	8.3151e-10	4.8181e-08	51	317	910	14228	localization of cell	ITGB1|NRP2|B4GALT1|ITGB3|LAMC1|DBH|ICAM1|TNN|CFL1|NRCAM|LBP|PRSS3|CAP1|GPX1|ITGA4|KRT2|HGF|ITGA1|SFTPD|APOA1|ARID5B|MIF|CEACAM1|MYH9|CDH13|ANG|S100A9|CD44|PAFAH1B1|ENG|LAMA5|ENPEP|THBS1|EGFR|THBS4|EFNB1|APOB|DISC1|VCAM1|TGFB1|LAMB2|MSN|SELP|CCDC88A|COL5A1|CDK5|FAP|SAA1|SAA2|S100P|PF4
48870	8.3151e-10	4.8181e-08	51	317	910	14228	cell motility	ITGB1|NRP2|B4GALT1|ITGB3|LAMC1|DBH|ICAM1|TNN|CFL1|NRCAM|LBP|PRSS3|CAP1|GPX1|ITGA4|KRT2|HGF|ITGA1|SFTPD|APOA1|ARID5B|MIF|CEACAM1|MYH9|CDH13|ANG|S100A9|CD44|PAFAH1B1|ENG|LAMA5|ENPEP|THBS1|EGFR|THBS4|EFNB1|APOB|DISC1|VCAM1|TGFB1|LAMB2|MSN|SELP|CCDC88A|COL5A1|CDK5|FAP|SAA1|SAA2|S100P|PF4
30334	8.9132e-10	5.094e-08	40	216	910	14228	regulation of cell migration	LAMA5|COL18A1|FLT1|LAMA2|CSF1|ITGB3|SERPINE1|HP|MIA3|THBS1|EGFR|THBS4|ICAM1|VTN|C5|P2RY6|C7|APOH|PDPN|KDR|ENPP2|DAG1|APOE|TGFB1|F10|IGFBP5|HGF|LAMB1|IGF1|MMP9|AGT|EFNA1|SELP|CREB3|TF|CDK5|ANGPTL3|CDH13|IL6ST|VCL
50819	1.3133e-09	7.4041e-08	13	26	910	14228	negative regulation of coagulation	F12|SERPINE1|F11|KRT1|PLG|GP1BA|F2|KNG1|VTN|PROC|APOH|APOE|KLKB1
48519	1.433e-09	7.9715e-08	193	2014	910	14228	negative regulation of biological process	ZNF174|SERPINE1|ENO1|SMC3|FGFRL1|PSMD9|LGALS1|TRIM24|DAG1|FBXO5|RAP80|ACTN1|SERPINF1|KRT1|MIF|SND1|DKK3|RBP4|AZGP1|THAP5|KIF20B|SPTBN4|SPTBN5|TXN|C5|C6|APOM|C7|APOH|APOE|A2M|SPTBN1|HIST1H4L|EIF2AK1|EIF2AK4|IGF1|PRDX6|TF|VNN1|CALR|HRG|COL18A1|ECM1|PCSK9|MIA3|BRCA2|PTPRF|GLI3|SERPINA5|PPP2R4|TMSB4X|XPO5|TIMP2|TIMP1|CAMP|DFFA|WARS|AHSG|SFTPD|MST1|NME2|GP1BA|PDCD1LG2|F2|NME1|PSMA6|BACE2|PSMA3|PSMA4|P…
48522	1.5044e-09	8.2584e-08	192	2002	910	14228	positive regulation of cellular process	APP|CSF1|TRAF3IP2|POP1|PDCD6|SERPINE1|HP|UBE3A|CLU|ICAM1|PSMD9|LGALS1|PNP|CAPNS1|CDH1|CFL1|TUBB1|KDR|NRCAM|FBXO5|RAP80|SKP1|IGFBP1|PDIA3|MED1|SAP30BP|ANAPC7|SERPINF1|HGF|ADIPOQ|DAPK3|MIF|TICAM1|HCFC1|TIAM1|RBP4|RFX6|S100A6|S100A4|RBCK1|HPRT1|IL6ST|UTRN|VCP|SDC4|NOTCH4|EIF5A2|NID1|KNG1|HPX|VTN|EFNB1|C5|C6|C7|C9|TSPAN6|PRDX1|MYO6|S100A12|APOE|APOB|SKIL|MCTS1|VCAM1|TGFB1|CADM1|GOT1|HSPA5|IGF1|PPBP|L…
30168	1.6535e-09	8.9588e-08	14	31	910	14228	platelet activation	FGB|FGA|VWF|HGF|FGG|GP1BA|F2|GP6|TREML1|COL3A1|ADAMTS13|SAA1|SAA2|PF4
51270	1.7847e-09	9.546e-08	42	239	910	14228	regulation of cellular component movement	LAMA5|COL18A1|FLT1|B4GALT1|LAMA2|CSF1|ITGB3|SERPINE1|HP|MIA3|THBS1|EGFR|THBS4|ICAM1|VTN|C5|P2RY6|C7|APOH|PDPN|KDR|ENPP2|DAG1|APOE|TGFB1|F10|IGFBP5|ACTN1|HGF|LAMB1|IGF1|MMP9|AGT|EFNA1|SELP|CREB3|TF|CDK5|ANGPTL3|CDH13|IL6ST|VCL
42592	1.8302e-09	9.6654e-08	93	774	910	14228	homeostatic process	SERPINA3|APP|CSF1|HEXB|SERPINE1|HP|PCSK9|PARK7|DBH|ASGR2|SMG6|RPS17|MB|PRX|KDR|TRIM24|OBFC1|QSOX1|TIMP1|SLC34A3|PDIA3|GPX1|SLC30A5|HGF|ADIPOQ|SFTPD|APOA2|APOA1|F2|ERP70|SLC9A2|RBP4|CACNB4|RFX6|ANGPTL3|ANG|IL6ST|ALDOA|FTL|LTF|CCL14|IREB2|EIF5A2|LCAT|PLG|TXN|ACAT2|CPN2|ACACA|KNG1|HSP90B1|CPN1|HPX|APOM|C7|CNR2|C9|PRDX1|LARGE|APOE|APOB|SKIL|CD55|SNCA|ABCA2|TGFB1|GOT1|HSPA1L|HBG1|GSS|GSR|APOC4|APOC3|I…
16052	2.2646e-09	1.181e-07	26	107	910	14228	carbohydrate catabolic process	GPI|PGLYRP2|H6PD|HEXB|ENO1|ENO3|LDHB|LDHA|GM2A|PGK1|CTBS|PDHA2|TPI1|MDH1|PKM2|PGAM1|AKR1A1|TALDO1|PGD|CHIT1|PKM|CPS1|CHI3L1|ALDOB|ALDOA|GAPDH
40012	2.3149e-09	1.1923e-07	42	241	910	14228	regulation of locomotion	LAMA5|COL18A1|FLT1|LAMA2|CSF1|POP1|ITGB3|SERPINE1|HP|MIA3|THBS1|EGFR|THBS4|ICAM1|VTN|C5|P2RY6|C7|APOH|PDPN|KDR|ENPP2|DAG1|APOE|SNCA|TGFB1|F10|IGFBP5|HGF|LAMB1|IGF1|MMP9|AGT|EFNA1|SELP|CREB3|TF|CDK5|ANGPTL3|CDH13|IL6ST|VCL
31401	2.3472e-09	1.1942e-07	41	232	910	14228	positive regulation of protein modification process	ITGB3|HP|PSMA7|THBS4|PSMB6|GHR|PSMD9|HPX|VTN|C6|PSMB5|PPP2R4|PSMB3|CDH1|PSMB1|FBXO5|CAMP|SKP1|TGFB1|ANAPC7|HSPA5|HGF|ADIPOQ|MIF|IGF1|F2|TICAM1|BMP7|AGT|FKBP1A|PSMA6|PSMA3|PSMA4|PSMA1|PSMA2|UBE2N|CLC|CRYAA|IL6ST|CD44|ENG
31589	2.4402e-09	1.2266e-07	25	100	910	14228	cell-substrate adhesion	ITGB1|LAMA5|ECM2|POP1|ITGB3|ITGA2B|HP|LAMC1|NID1|VTN|ADAMTS13|TNN|DAG1|VWF|LAMB2|ACTN1|ITGA1|LAMB1|AGT|COL3A1|BCAM|CDK5|ANGPTL3|CD44|VCL
7275	2.5902e-09	1.2865e-07	262	2966	910	14228	multicellular organismal development	SPON2|APP|SPARC|POP1|SERPINE1|ENO3|FGFRL1|NDST1|LGALS1|ALCAM|ANPEP|KDR|DAG1|MED1|SERPINF1|KRT2|DAPK3|KRT1|MIF|MYO7A|ACSL3|HSPG2|DKK3|KRT9|SFRP4|TIAM1|RBP4|BCAM|BTD|RFX6|MYL1|PSME4|TAGLN2|PFN1|ZFPM1|SPTBN4|ENPEP|HKR1|SDC4|C5|C6|C7|APOH|PRDX1|MYO6|PCDHA5|LTA4H|APOE|APOB|NHEJ1|CADM1|IGF1|L1CAM|EXT1|EXT2|CCDC88A|COL1A2|CALR|HRG|PAM|SIM2|ITM2B|GPI|COL18A1|ECM1|NRP2|HEXB|CTSZ|SERPINA10|PCSK9|HBB|PRL|BR…
6007	2.933e-09	1.4396e-07	18	54	910	14228	glucose catabolic process	GPI|PDHA2|TPI1|H6PD|MDH1|PKM2|PGAM1|TALDO1|ENO1|PGD|ENO3|LDHB|LDHA|PKM|PGK1|ALDOB|ALDOA|GAPDH
32502	3.7484e-09	1.8184e-07	280	3229	910	14228	developmental process	SPON2|APP|SPARC|POP1|SERPINE1|ENO3|FGFRL1|NDST1|LGALS1|ALCAM|ANPEP|KDR|DAG1|FBXO5|MED1|SERPINF1|KRT2|DAPK3|KRT1|MIF|MYO7A|ACSL3|HSPG2|DKK3|KRT9|SFRP4|TIAM1|RBP4|BCAM|BTD|RFX6|MYL1|PSME4|TAGLN2|PFN1|ZFPM1|SPTBN4|ENPEP|HKR1|SDC4|C5|C6|C7|APOH|PRDX1|MYO6|PCDHA5|LTA4H|APOE|APOB|NHEJ1|CADM1|MCAM|RAB3IP|IGF1|L1CAM|EXT1|EXT2|CCDC88A|TF|COL1A2|CALR|HRG|PAM|SIM2|ITM2B|GPI|COL18A1|ECM1|NRP2|HEXB|CTSZ|SERPI…
43086	3.9602e-09	1.8991e-07	48	302	910	14228	negative regulation of catalytic activity	CSTB|ECM1|POP1|SERPINE1|PCSK9|ADCY1|TAZ|CST6|THBS1|PSMA7|PSMB6|CST3|PSMD9|VTN|C6|PSMB5|PPP2R4|CNR2|PSMB3|CDH1|PSMB1|FLNA|FBXO5|APOE|YWHAG|RAG1|SNCA|GPX1|ANAPC7|HSPA5|SORT1|APLP1|APOA2|APOA1|APOC3|BMP7|FKBP1A|PSMA6|PSMA3|PSMA4|FABP4|PSMA1|PSMA2|APOC1|ANGPTL3|CRYAA|CRYAB|ENG
55088	5.2771e-09	2.5018e-07	19	62	910	14228	lipid homeostasis	ABCA2|GOT1|APOA2|APOC4|PCSK9|APOA1|APOC3|LCAT|ACAT2|ACACA|ASGR2|FABP4|APOM|C9|APOC2|ALMS1|ANGPTL3|APOE|APOB
30335	6.9721e-09	3.2683e-07	28	128	910	14228	positive regulation of cell migration	COL18A1|FLT1|CSF1|ITGB3|SERPINE1|MIA3|THBS1|EGFR|THBS4|ICAM1|VTN|P2RY6|C7|PDPN|KDR|TGFB1|F10|HGF|LAMB1|IGF1|MMP9|AGT|SELP|CREB3|TF|ANGPTL3|CDH13|IL6ST
10466	7.1544e-09	3.3165e-07	13	29	910	14228	negative regulation of peptidase activity	CSTB|ECM1|GPX1|HSPA5|SERPINE1|CST6|THBS1|CST3|VTN|CRYAA|CRYAB|RAG1|SNCA
40017	8.3248e-09	3.8166e-07	29	137	910	14228	positive regulation of locomotion	COL18A1|FLT1|CSF1|POP1|ITGB3|SERPINE1|MIA3|THBS1|EGFR|THBS4|ICAM1|VTN|P2RY6|C7|PDPN|KDR|TGFB1|F10|HGF|LAMB1|IGF1|MMP9|AGT|SELP|CREB3|TF|ANGPTL3|CDH13|IL6ST
6066	8.5752e-09	3.8887e-07	60	431	910	14228	alcohol metabolic process	GPI|B4GALT1|HEXB|PCSK9|GPT|ENO1|DBH|ENO3|FPGT|TPI1|PGAM1|ADIPOQ|AKR1A1|APOA2|TALDO1|APOA1|PGD|RBP4|PKM|CAT|ANGPTL3|ALDOB|IL6ST|ALDOA|CRYAB|GAPDH|PAFAH1B1|H6PD|ADH1C|ADH1B|PON1|GDPD1|LCAT|ACAT2|ADH4|LDHB|LDHA|UGP2|MAN2A1|LARGE|PGK1|APOF|SPP2|APOE|APOB|APOL1|APOL3|SNCA|BCHE|PDHA2|MDH1|GOT1|PKM2|AGL|FUCA2|APOC3|FABP3|CPS1|FAP|APOC1
10033	8.9256e-09	3.9677e-07	99	869	910	14228	response to organic substance	SERPINE1|HP|CLU|UBE2L3|LGALS1|CDH1|CFL1|DAG1|B2M|IGFBP1|SERPINF1|HGF|ADIPOQ|IGFBP2|MIF|ACSL3|TICAM1|RBP4|LOX|IL6ST|PFN1|VCP|ACACA|HSP90B1|ADH4|APOM|C7|LTA4H|CD14|APOE|APOB|A2M|SKIL|ABCA2|TGFB1|GOT1|HSPA5|HBG1|HSPA4|EIF2AK1|GGH|EIF2AK4|BMP7|SELP|TF|GCLC|CPS1|CDK5|SELL|CALCOCO2|PCSK9|DBH|BRCA2|SERPINA7|GHR|MB|CA2|SDF4|LBP|CAMP|CAP1|HSP90AA1|GPX3|APOA2|OSMR|DCN|NME1|CREB3|ACTA1|COL6A2|ANGPTL3|CDH13|…
16337	8.9397e-09	3.9677e-07	46	290	910	14228	cell-cell adhesion	ITGB1|CD84|POP1|AMIGO2|ICAM2|EGFR|PTPRF|THBS4|ICAM1|CDH6|CDH5|CDH3|CNR2|CDH1|PDPN|PCDHA5|OLR1|NRCAM|NCAM1|CD58|NCAM2|VCAM1|CADM1|ITGA4|CD93|PCDHGC5|GPR98|MSN|L1CAM|PCDHA10|SELP|CEACAM1|BMP1|VNN1|COL6A2|CDH11|MYH9|CDH13|DSG2|DSG3|DSC1|DSC2|PVRL1|CD44|VCL|DSC3
80134	9.5724e-09	4.2038e-07	49	320	910	14228	regulation of response to stress	SERPINE1|RAP80|LBP|GPX1|AHSG|SERPINF1|HGF|ADIPOQ|KRT1|GP1BA|MIF|F2|TICAM1|OSMR|UBE2V2|MASP1|IL6ST|CD44|CPB2|SERPINC1|PLG|THBS1|KNG1|HPX|VTN|C6|CNR2|APOH|PRDX1|PDPN|SPP1|APOE|A2M|CADM1|AMBP|EIF2AK1|F12|F11|AGT|SELP|TF|FABP4|PROC|SCGB1A1|UBE2N|SAA1|SAA2|HRG|KLKB1
40011	9.7632e-09	4.2429e-07	61	443	910	14228	locomotion	ITGB1|NRP2|B4GALT1|ITGB3|LECT2|LAMC1|DBH|ICAM1|TNN|CFL1|ENPP2|NRCAM|LBP|PRSS3|CAP1|GPX1|ITGA4|KRT2|HGF|ITGA1|SFTPD|APOA1|ARID5B|MIF|RNASE2|CREB3|CEACAM1|MYH9|CDH13|ANG|S100A9|S100A8|CD44|PAFAH1B1|ENG|LAMA5|ENPEP|THBS1|EGFR|THBS4|EFNB1|C5|C7|APOB|DISC1|VCAM1|TGFB1|SERPIND1|LAMB2|MSN|PPBP|SELP|CCDC88A|COL5A1|CDK5|FAP|SAA1|SAA2|S100P|PVRL1|PF4
30155	1.5725e-08	6.7636e-07	30	149	910	14228	regulation of cell adhesion	LAMA5|ECM2|SDC4|LAMA2|CSF1|SERPINE1|MIA3|PLG|NID1|THBS1|KNG1|ICAM1|VTN|LGALS1|EGFLAM|ARHGDIB|SPP1|KDR|GSN|TGFB1|ADIPOQ|L1CAM|SELP|SAA1|SAA2|CDH13|TGFBI|HRG|UTRN|ENG
51248	2.2785e-08	9.6998e-07	37	213	910	14228	negative regulation of protein metabolic process	ITGB3|SERPINE1|TAZ|THBS1|PSMA7|SERPINA5|PSMB6|PSMD9|C6|PSMB5|APOM|PPP2R4|PSMB3|CDH1|PSMB1|FLNA|FBXO5|TIMP1|A2M|SNCA|TGFB1|ANAPC7|IGFBP5|EIF2AK1|EIF2AK4|F2|PSMA6|PSMA3|GCLC|PSMA4|PSMA1|CDK5|PSMA2|ANG|CALR|MASP1|ENG
48878	2.4841e-08	1.0267e-06	68	530	910	14228	chemical homeostasis	APP|HEXB|SERPINE1|HP|PCSK9|PARK7|DBH|ASGR2|PRX|KDR|TRIM24|SLC34A3|SLC30A5|ADIPOQ|SFTPD|APOA2|APOA1|F2|SLC9A2|RBP4|CACNB4|RFX6|ANGPTL3|IL6ST|FTL|LTF|CCL14|IREB2|EIF5A2|LCAT|ACAT2|CPN2|ACACA|KNG1|HSP90B1|CPN1|HPX|APOM|C7|CNR2|C9|APOE|APOB|CD55|SNCA|ABCA2|TGFB1|GOT1|HBG1|GSS|APOC4|APOC3|IGF1|SOD2|CP|AGT|SOD1|TF|FABP4|CPS1|CDK5|APOC2|ALMS1|LCN2|SAA1|SAA2|CALR|OTC
42981	2.5033e-08	1.0267e-06	96	851	910	14228	regulation of apoptosis	APP|COL18A1|FCMR|B4GALT1|PDCD6|SERPINE1|HP|PCSK9|TNFAIP3|DBH|BRCA2|MPO|CLU|PTPRF|GLI3|GHR|COMP|SART1|LGALS1|PPP2R4|CDH1|CFL1|TUBB1|RAG1|EIF5A|PDIA3|MED1|SAP30BP|DFFA|GPX1|ACTN1|HGF|ADIPOQ|ITGA1|MST1|DAPK3|NME2|MIF|F2|TICAM1|MMP9|YWHAZ|NME1|TIAM1|CAT|G2E3|CDH13|CRYAA|CRYAB|CD44|CSTB|VCP|GSTP1|GLO1|AMIGO2|PLG|CST6|THBS1|EGFR|KNG1|HSP90B1|C6|C9|APOH|PRDX1|NAE1|APOE|SKIL|SNCA|CASP8AP2|TGFB1|HSPA5|API…
34367	2.5348e-08	1.0267e-06	11	22	910	14228	macromolecular complex remodeling	APOM|APOC2|APOC1|APOA2|APOA1|APOC3|LCAT|APOE|APOB|MPO|AGT
34368	2.5348e-08	1.0267e-06	11	22	910	14228	protein-lipid complex remodeling	APOM|APOC2|APOC1|APOA2|APOA1|APOC3|LCAT|APOE|APOB|MPO|AGT
34369	2.5348e-08	1.0267e-06	11	22	910	14228	plasma lipoprotein particle remodeling	APOM|APOC2|APOC1|APOA2|APOA1|APOC3|LCAT|APOE|APOB|MPO|AGT
30194	2.5766e-08	1.0336e-06	9	14	910	14228	positive regulation of blood coagulation	CPB2|TF|APOH|F12|SERPINE1|PLG|HRG|F2|THBS1
6096	3.047e-08	1.2107e-06	15	43	910	14228	glycolysis	GPI|PDHA2|TPI1|MDH1|PKM2|PGAM1|ENO1|ENO3|LDHB|LDHA|PKM|PGK1|ALDOB|ALDOA|GAPDH
51272	3.3635e-08	1.3199e-06	28	137	910	14228	positive regulation of cellular component movement	COL18A1|FLT1|CSF1|ITGB3|SERPINE1|MIA3|THBS1|EGFR|THBS4|ICAM1|VTN|P2RY6|C7|PDPN|KDR|TGFB1|F10|HGF|LAMB1|IGF1|MMP9|AGT|SELP|CREB3|TF|ANGPTL3|CDH13|IL6ST
51246	3.3939e-08	1.3199e-06	77	635	910	14228	regulation of protein metabolic process	APP|CSF1|ITGB3|SERPINE1|HP|PCSK9|TAZ|UBE2L3|SERPINA5|GHR|RPS4X|PSMD9|PPP2R4|CDH1|FBXO5|TIMP1|CAMP|SKP1|EIF5A|ANAPC7|IGFBP5|HGF|ADIPOQ|APLP1|APOA1|MIF|F2|TICAM1|PSMA6|PSMA3|PSMA4|PSMA1|PSMA2|UBE2V2|ANG|MASP1|CRYAA|IL6ST|CD44|ENG|VCP|IREB2|EIF5A2|THBS1|EGFR|PSMA7|THBS4|PSMB6|HPX|VTN|C6|PSMB5|APOM|PSMB3|PSMB1|FLNA|APOE|A2M|SNCA|TGFB1|HSPA5|EIF2AK1|F12|EIF2AK4|IGF1|UBE2G2|BMP7|AGT|FKBP1A|CCDC88A|GCLC…
43170	3.4169e-08	1.3199e-06	329	4004	910	14228	macromolecule metabolic process	APP|PRSS1|PGLYRP2|RNH1|POP1|C4BPA|C4BPB|SMC3|RPL8|UBE2L3|CCT6B|NDST1|PSMD9|C4A|RPS17|CAPNS1|ANPEP|RPS6KA2|KDR|TRIM24|OBFC1|RAP80|HMCN1|PRSS3|HABP2|SKP1|MED1|ST6GAL1|SECISBP2|DAPK3|KRT1|RNASE6|RNASE2|MED4|HCFC1|CHIT1|RBP4|HECW1|RBCK1|CFB|CFD|ENPEP|CFI|EIF5A2|HPR|CFP|TTBK1|C2|TTBK2|HPX|C5|C6|ADAMTS13|APOM|C7|C9|APOH|ST3GAL5|LTA4H|APOE|APOB|ATRIP|NHEJ1|SPTBN1|CTSA|EIF2AK1|EIF2AK4|IGF1|PGA3|EXT1|EXT2…
43067	3.9686e-08	1.519e-06	96	859	910	14228	regulation of programmed cell death	APP|COL18A1|FCMR|B4GALT1|PDCD6|SERPINE1|HP|PCSK9|TNFAIP3|DBH|BRCA2|MPO|CLU|PTPRF|GLI3|GHR|COMP|SART1|LGALS1|PPP2R4|CDH1|CFL1|TUBB1|RAG1|EIF5A|PDIA3|MED1|SAP30BP|DFFA|GPX1|ACTN1|HGF|ADIPOQ|ITGA1|MST1|DAPK3|NME2|MIF|F2|TICAM1|MMP9|YWHAZ|NME1|TIAM1|CAT|G2E3|CDH13|CRYAA|CRYAB|CD44|CSTB|VCP|GSTP1|GLO1|AMIGO2|PLG|CST6|THBS1|EGFR|KNG1|HSP90B1|C6|C9|APOH|PRDX1|NAE1|APOE|SKIL|SNCA|CASP8AP2|TGFB1|HSPA5|API…
50727	4.2611e-08	1.6161e-06	22	91	910	14228	regulation of inflammatory response	GPX1|AHSG|SERPINC1|SERPINF1|F12|HGF|ADIPOQ|SERPINE1|OSMR|AGT|C6|FABP4|CNR2|SCGB1A1|SAA1|SAA2|APOE|MASP1|LBP|IL6ST|A2M|KLKB1
42632	4.3516e-08	1.621e-06	15	44	910	14228	cholesterol homeostasis	ABCA2|APOA2|PCSK9|APOA1|APOC3|LCAT|ACAT2|FABP4|APOM|C9|APOC2|ALMS1|ANGPTL3|APOE|APOB
55092	4.3516e-08	1.621e-06	15	44	910	14228	sterol homeostasis	ABCA2|APOA2|PCSK9|APOA1|APOC3|LCAT|ACAT2|FABP4|APOM|C9|APOC2|ALMS1|ANGPTL3|APOE|APOB
32371	4.578e-08	1.6754e-06	11	23	910	14228	regulation of sterol transport	ABCA2|LRP1|APOC2|ADIPOQ|APOC1|PON1|APOA2|APOA1|APOC3|DBI|APOE
32374	4.578e-08	1.6754e-06	11	23	910	14228	regulation of cholesterol transport	ABCA2|LRP1|APOC2|ADIPOQ|APOC1|PON1|APOA2|APOA1|APOC3|DBI|APOE
10941	5.893e-08	2.1305e-06	96	866	910	14228	regulation of cell death	APP|COL18A1|FCMR|B4GALT1|PDCD6|SERPINE1|HP|PCSK9|TNFAIP3|DBH|BRCA2|MPO|CLU|PTPRF|GLI3|GHR|COMP|SART1|LGALS1|PPP2R4|CDH1|CFL1|TUBB1|RAG1|EIF5A|PDIA3|MED1|SAP30BP|DFFA|GPX1|ACTN1|HGF|ADIPOQ|ITGA1|MST1|DAPK3|NME2|MIF|F2|TICAM1|MMP9|YWHAZ|NME1|TIAM1|CAT|G2E3|CDH13|CRYAA|CRYAB|CD44|CSTB|VCP|GSTP1|GLO1|AMIGO2|PLG|CST6|THBS1|EGFR|KNG1|HSP90B1|C6|C9|APOH|PRDX1|NAE1|APOE|SKIL|SNCA|CASP8AP2|TGFB1|HSPA5|API…
19320	5.9236e-08	2.1305e-06	18	64	910	14228	hexose catabolic process	GPI|PDHA2|TPI1|H6PD|MDH1|PKM2|PGAM1|TALDO1|ENO1|PGD|ENO3|LDHB|LDHA|PKM|PGK1|ALDOB|ALDOA|GAPDH
46164	6.0812e-08	2.1685e-06	20	78	910	14228	alcohol catabolic process	GPI|PDHA2|TPI1|H6PD|MDH1|PKM2|PGAM1|TALDO1|ENO1|DBH|PGD|ENO3|ADH4|LDHB|LDHA|PKM|PGK1|ALDOB|ALDOA|GAPDH
1867	6.7402e-08	2.383e-06	6	6	910	14228	complement activation, lectin pathway	FCN2|FCN3|KRT1|MASP2|MASP1|MBL2
10038	9.4162e-08	3.3012e-06	29	152	910	14228	response to metal ion	CUTA|PDCD6|TNC|LCAT|THBS1|EGFR|TTN|CA2|CDH1|LTA4H|APOB|B2M|SNCA|SLC34A3|FGB|FGA|GSN|GPX1|GPX3|SLC30A5|GSS|IGFBP2|FGG|GGH|SOD3|SOD1|ACTA1|KRT14|ALDOB
1944	9.6141e-08	3.3425e-06	42	273	910	14228	vasculature development	LAMA5|GPI|COL18A1|ENPEP|FLT1|B4GALT1|PLXND1|ITGB3|NOTCH4|PLG|DBH|THBS1|GLI3|CDH5|ANPEP|PDPN|KDR|APOE|APOB|SPEN|GPX1|ITGA4|MMP2|IGF1|HSPG2|AGT|SELP|COL3A1|PTPRB|CEACAM1|COL1A2|COL5A1|FAP|LOX|ANGPTL3|MYH9|CDH13|CSPG4|ANG|CD44|ENG|FGFR1
32501	9.8251e-08	3.3876e-06	351	4365	910	14228	multicellular organismal process	SPON2|APP|PRSS1|SPARC|POP1|SERPINE1|C4BPB|ENO3|FGFRL1|CCT6B|CRHBP|NDST1|LGALS1|ALCAM|PNP|ANPEP|KDR|DAG1|FBXO5|HMCN1|PRSS3|MED1|SERPINF1|KRT2|DAPK3|KRT1|CACNA2D4|MIF|MYO7A|ACSL3|HSPG2|DKK3|KRT9|SFRP4|TIAM1|RBP4|BCAM|BTD|RFX6|MYL1|PSME4|TAGLN2|KCNQ5|PFN1|TLN1|ZFPM1|OR8G1|SPTBN4|ENPEP|HKR1|SDC4|SLC22A2|EIF5A2|C5|C6|ADAMTS13|APOM|C7|C9|APOH|PRDX1|MYO6|PCDHA5|LTA4H|APOE|APOB|NHEJ1|CADM1|IGF1|L1CAM|ZNF…
46365	9.9724e-08	3.4102e-06	18	66	910	14228	monosaccharide catabolic process	GPI|PDHA2|TPI1|H6PD|MDH1|PKM2|PGAM1|TALDO1|ENO1|PGD|ENO3|LDHB|LDHA|PKM|PGK1|ALDOB|ALDOA|GAPDH
34377	1.0679e-07	3.593e-06	8	12	910	14228	plasma lipoprotein particle assembly	APOM|APOC1|APOA2|APOA1|APOC3|APOE|APOB|ACAT2
65005	1.0679e-07	3.593e-06	8	12	910	14228	protein-lipid complex assembly	APOM|APOC1|APOA2|APOA1|APOC3|APOE|APOB|ACAT2
1568	1.1662e-07	3.8924e-06	41	265	910	14228	blood vessel development	LAMA5|GPI|COL18A1|ENPEP|FLT1|B4GALT1|PLXND1|ITGB3|NOTCH4|PLG|DBH|THBS1|GLI3|CDH5|ANPEP|KDR|APOE|APOB|SPEN|GPX1|ITGA4|MMP2|IGF1|HSPG2|AGT|SELP|COL3A1|PTPRB|CEACAM1|COL1A2|COL5A1|FAP|LOX|ANGPTL3|MYH9|CDH13|CSPG4|ANG|CD44|ENG|FGFR1
51704	1.3342e-07	4.4178e-06	88	785	910	14228	multi-organism process	ITGB1|APP|PGLYRP2|FLT1|HEXB|ITGB3|SERPINE1|PZP|UBE3A|ENO1|PRL|SMC3|CLU|ICAM1|CRHBP|ANPEP|CFL1|KDR|LBP|B2M|CAMP|MBL2|MED1|GPX1|CD93|GPX3|MAGI3|HGF|PLA2G4C|IGFBP2|APOA2|HLA-B|RAD23A|THOC2|TICAM1|SND1|DCN|HCFC1|CHIT1|SFRP4|CREB3|PSMA3|PSMA4|PSMA2|RBCK1|TOP1|PPIA|LTF|GRN|FBLN1|CFP|PSMA7|PSMB6|HPX|C6|PSMB5|C7|CNR2|PSMB3|C9|PSMB1|SPP1|S100A12|CD14|APOB|APOL1|APOL3|SNCA|SPEN|KDM4A|VCAM1|TGFB1|AMBP|EIF2A…
51241	1.7397e-07	5.715e-06	31	174	910	14228	negative regulation of multicellular organismal process	ECM1|SERPINE1|PCSK9|PLG|THBS1|KNG1|CST3|VTN|CNR2|APOH|APOE|LBP|SRGN|BCHE|AHSG|F12|HGF|ADIPOQ|F11|KRT1|APOA1|APOC3|GP1BA|F2|SOD1|RBP4|PROC|APOC2|SCGB1A1|APOC1|KLKB1
32268	2.1149e-07	6.8931e-06	68	560	910	14228	regulation of cellular protein metabolic process	APP|CSF1|ITGB3|HP|PCSK9|TAZ|SERPINA5|GHR|RPS4X|PSMD9|PPP2R4|CDH1|FBXO5|TIMP1|CAMP|SKP1|EIF5A|ANAPC7|IGFBP5|HGF|ADIPOQ|APLP1|APOA1|MIF|F2|TICAM1|PSMA6|PSMA3|PSMA4|PSMA1|PSMA2|ANG|CRYAA|IL6ST|CD44|ENG|VCP|IREB2|EIF5A2|THBS1|EGFR|PSMA7|THBS4|PSMB6|HPX|VTN|C6|PSMB5|APOM|PSMB3|PSMB1|APOE|SNCA|TGFB1|HSPA5|EIF2AK1|EIF2AK4|IGF1|BMP7|AGT|FKBP1A|CCDC88A|GCLC|CDK5|UBE2N|CALR|CLC|LSM14B
23056	2.1785e-07	7.0454e-06	42	281	910	14228	positive regulation of signaling process	ECM1|CSF1|TRAF3IP2|POP1|UBE3A|NENF|PRL|THBS1|EGFR|AKAP12|GHR|HPX|LGALS1|TSPAN6|FLNA|S100A12|NCAM1|APOL3|SNCA|GPX1|TGFB1|GOT1|F10|HGF|ADIPOQ|MIF|IGF1|L1CAM|TICAM1|ZDHHC17|AGT|FKBP1A|TF|CAT|UBE2N|CDH13|S100A4|RBCK1|CLC|IL6ST|CD44|FGFR1
6638	2.2043e-07	7.0742e-06	15	49	910	14228	neutral lipid metabolic process	GPX1|APOA2|PCSK9|APOC3|CPS1|FAP|APOH|CAT|ALMS1|APOC1|ANG|APOE|IL6ST|APOB|SNCA
43623	2.5161e-07	8.013e-06	28	150	910	14228	cellular protein complex assembly	APCS|AHCTF1|COX15|TAZ|TTN|CCT6B|TUBB8|PSMD9|TUBB1|FLNA|FBXO5|FGB|FGA|HSP90AA1|GSN|TGFB1|HSPA4|FGG|TBCA|FKBP1A|CDK5|TCP1|ANG|CALR|ALDOB|HRG|CRYAA|CRYAB
50820	2.625e-07	8.2345e-06	9	17	910	14228	positive regulation of coagulation	CPB2|TF|APOH|F12|SERPINE1|PLG|HRG|F2|THBS1
44092	2.6251e-07	8.2345e-06	51	376	910	14228	negative regulation of molecular function	ECM1|POP1|SERPINE1|PCSK9|PARK7|TAZ|PSMD9|PPP2R4|CDH1|FBXO5|YWHAG|RAG1|GPX1|ANAPC7|APLP1|APOA2|APOA1|PSMA6|PSMA3|PSMA4|PSMA1|PSMA2|CAT|ANGPTL3|RBCK1|CRYAA|CRYAB|ENG|CSTB|ADCY1|CST6|THBS1|PSMA7|PSMB6|CST3|VTN|C6|PSMB5|CNR2|PSMB3|PSMB1|FLNA|APOE|SNCA|HSPA5|SORT1|APOC3|BMP7|FKBP1A|FABP4|APOC1
50790	2.7835e-07	8.6661e-06	97	907	910	14228	regulation of catalytic activity	APP|CSF1|POP1|PDCD6|SERPINE1|HP|TNC|PSMD9|CDH1|FBXO5|RAG1|SKP1|ANAPC7|HGF|APLP1|DSC1|VCP|SDC4|HSP90B1|VTN|C5|C6|C9|APOH|APOE|TBC1D12|NHEJ1|TGFB1|HSPA5|BMP7|EFNA1|CCDC88A|TF|CDK5|UBE2N|HRG|ECM1|FLT1|ITGB3|GDI2|PCSK9|TAZ|GHR|PPP2R4|GM2A|YWHAG|CAP1|GPX1|ITGA1|APOA2|APOA1|F2|PSMA6|TBC1D1|PSMA3|RCN1|TBC1D2|PSMA4|PSMA1|PSMA2|ANGPTL3|ANG|ALDOB|CRYAA|CRYAB|PAFAH1B1|ENG|CSTB|LRP1|ADCY1|CST6|THBS1|EGFR|PSM…
7160	2.811e-07	8.6871e-06	20	85	910	14228	cell-matrix adhesion	ITGB1|LAMA5|ECM2|ITGB3|ACTN1|ITGA1|ITGA2B|HP|NID1|AGT|VTN|COL3A1|BCAM|ADAMTS13|CDK5|TNN|ANGPTL3|DAG1|CD44|VCL
50793	3.4497e-07	1.0558e-05	87	790	910	14228	regulation of developmental process	ECM1|RNH1|B4GALT1|CSF1|POP1|ITGB3|SERPINE1|HP|BRCA2|TAZ|CLU|PTPRF|GLI3|GHR|SART1|LGALS1|PNP|CA2|CDH1|KDR|TIMP2|NEFM|NRCAM|CAMP|YWHAG|EIF5A|SRGN|MED1|WARS|GPX1|AHSG|SERPINF1|HGF|ADIPOQ|SPINK5|KRT1|NME2|F2|NME1|TIAM1|RBP4|ANGPTL3|MYH9|IL6ST|ALDOA|CRP|LAMA5|LAMA2|NOTCH4|LRRC17|NTN4|THBS1|THBS4|CST3|C5|C6|C7|APOH|PDPN|CLPTM1|SPP1|APOE|APOB|DISC1|SKIL|SPEN|TGFB1|HIST1H4L|GPR98|IGF1|SOD2|BMP7|AGT|SOD1|…
48523	3.4672e-07	1.0558e-05	169	1838	910	14228	negative regulation of cellular process	FCMR|ZNF174|SERPINE1|HP|ENO1|SMC3|MPO|CLU|FGFRL1|COMP|PSMD9|CDH5|LGALS1|CDH1|BASP1|CFL1|ARHGDIB|TRIM24|DAG1|FBXO5|RAP80|RAG1|ANAPC7|IGFBP5|ACTN1|SERPINF1|HGF|ADIPOQ|APLP1|ARID5B|MIF|FOXP2|DKK3|RBP4|AZGP1|THAP5|IL6ST|KIF20B|VCL|SPTBN4|SPTBN5|GLO1|NOTCH4|TXN|PHF21A|KNG1|HSP90B1|C5|C6|APOM|APOH|TPR|APOE|IGFBP6|SKIL|SPTBN1|TGFB1|AMBP|HSPA5|API5|HIST1H4L|EIF2AK1|GPR98|EIF2AK4|IGF1|BMP7|PRDX6|TF|GCLC|P…
44419	3.5525e-07	1.074e-05	46	327	910	14228	interspecies interaction between organisms	ITGB1|ITGB3|UBE3A|FBLN1|PSMA7|ICAM1|PSMB6|HPX|C6|PSMB5|PSMB3|C9|ANPEP|PSMB1|KDR|CAMP|MBL2|SPEN|KDM4A|VCAM1|GPX1|TGFB1|CD93|AMBP|EIF2AK1|MAGI3|SGTA|APOA2|HLA-B|RAD23A|THOC2|SND1|HCFC1|POLA1|CREB3|PSMA3|PSMA4|ERCC3|ALB|ZYX|RBCK1|TOP1|VIM|PPIA|PVRL1|RAN
22607	3.5952e-07	1.0791e-05	97	912	910	14228	cellular component assembly	APP|HP|IL1RAP|CCT6B|TUBB8|PSMD9|CDH1|TUBB1|TRIM24|ARFIP2|NRCAM|KNTC1|FBXO5|MED1|ACTN1|ADIPOQ|MIF|MYO7A|MED4|OLFM1|RBP4|LOX|KCNQ5|HPRT1|TLN1|VCL|VCP|COX15|ACAT2|HSP90B1|APOM|C9|ZNHIT6|MYO6|APOE|APOB|SKIL|TGFB1|CADM1|HIST1H4L|HSPA4|RAB3IP|TBCA|CCDC88A|CDK5|CALR|HRG|AHCTF1|ITGB3|GPT|LAMC1|TAZ|ALAD|SART1|C1QTNF1|NEFM|CTSD|FGB|FGA|HSP90AA1|VWF|GPX3|FGG|APOA2|HAUS3|APOA1|ACTA1|CAT|TCP1|CDH13|ANG|LCP1|A…
10953	4.3316e-07	1.2726e-05	7	10	910	14228	regulation of protein maturation by peptide bond cleavage	C6|F12|SERPINE1|MASP1|A2M|KLKB1|THBS1
51918	4.3316e-07	1.2726e-05	7	10	910	14228	negative regulation of fibrinolysis	CPB2|APOH|SERPINE1|PLG|HRG|F2|THBS1
70613	4.3316e-07	1.2726e-05	7	10	910	14228	regulation of protein processing	C6|F12|SERPINE1|MASP1|A2M|KLKB1|THBS1
30301	4.6982e-07	1.3518e-05	13	39	910	14228	cholesterol transport	APOA2|APOA1|APOC3|LCAT|CLU|ACAT2|APOM|FAP|C9|APOC2|APOC1|APOE|APOB
15918	4.6982e-07	1.3518e-05	13	39	910	14228	sterol transport	APOA2|APOA1|APOC3|LCAT|CLU|ACAT2|APOM|FAP|C9|APOC2|APOC1|APOE|APOB
32368	4.6982e-07	1.3518e-05	13	39	910	14228	regulation of lipid transport	ABCA2|LRP1|ITGB3|ADIPOQ|PON1|APOA2|APOA1|APOC3|DBI|THBS1|APOC2|APOC1|APOE
50789	4.7992e-07	1.3714e-05	490	6537	910	14228	regulation of biological process	ITSN2|RNH1|ZNF174|POP1|SERPINE1|C4BPA|C4BPB|ENO1|SMC3|FGFRL1|CRHBP|NDST1|PSMD9|ALCAM|CAPNS1|MED1|SAP30BP|SERPINF1|DAPK3|MED4|SND1|HCFC1|DKK3|RBP4|BCAM|RFX6|SPARCL1|RBCK1|HPRT1|CFB|CFD|CFI|CFP|C2|HPX|C5|C6|C7|C9|PRDX1|MYO6|S100A12|RSU1|ATRIP|MCTS1|ABCA2|CADM1|EIF2AK1|EIF2AK4|L1CAM|ZNF35|PRDX6|TREML1|BHMT|COL1A2|HRG|PAM|SERPINA3|HEXB|ARHGAP1|ZNF44|GLI3|ASGR2|SERPINA5|SMG6|PPP2R4|CHL1|ZNF280A|TMSB4X…
34381	4.9519e-07	1.4054e-05	9	18	910	14228	lipoprotein particle clearance	APOM|APOC2|ADIPOQ|APOC1|APOA2|APOA1|APOC3|APOE|APOB
22603	5.1008e-07	1.4379e-05	43	300	910	14228	regulation of anatomical structure morphogenesis	ECM1|RNH1|B4GALT1|CSF1|POP1|SERPINE1|HP|NTN4|TAZ|THBS1|PTPRF|THBS4|CST3|C5|C6|C7|CDH1|APOH|PDPN|SPP1|KDR|NEFM|NRCAM|APOE|SKIL|CAMP|WARS|TGFB1|SERPINF1|HGF|ADIPOQ|SPINK5|KRT1|BMP7|EFNA1|TIAM1|TF|ANGPTL3|PLXNB2|MYH9|ALDOA|PF4|FGFR1
52547	5.2689e-07	1.4655e-05	22	104	910	14228	regulation of peptidase activity	CASP8AP2|CSTB|ECM1|VCP|GPX1|HSPA5|PDCD6|SERPINE1|HP|F2|CST6|THBS1|CST3|VTN|TF|C6|CDH1|C9|CRYAA|CRYAB|RAG1|SNCA
31960	5.2689e-07	1.4655e-05	22	104	910	14228	response to corticosteroid stimulus	CAP1|BCHE|TGFB1|GOT1|HBG1|GPX3|SERPINF1|HGF|ADIPOQ|SERPINE1|IGFBP2|APOA2|LCAT|SERPINA7|AGT|UBE2L3|CPN1|GHR|FABP4|CPS1|ALDOB|A2M
6006	5.7477e-07	1.588e-05	27	147	910	14228	glucose metabolic process	GPI|H6PD|GPT|ENO1|ENO3|LDHB|LDHA|UGP2|PGK1|PDHA2|TPI1|MDH1|PKM2|PGAM1|AGL|ADIPOQ|AKR1A1|TALDO1|PGD|RBP4|PKM|CPS1|ALDOB|IL6ST|ALDOA|CRYAB|GAPDH
44275	5.8531e-07	1.6065e-05	19	81	910	14228	cellular carbohydrate catabolic process	GPI|PDHA2|TPI1|H6PD|MDH1|PKM2|PGAM1|TALDO1|ENO1|PGD|ENO3|LDHB|LDHA|PKM|CPS1|PGK1|ALDOB|ALDOA|GAPDH
6979	6.255e-07	1.7056e-05	31	184	910	14228	response to oxidative stress	SERPINE1|PARK7|MPO|CLU|EGFR|PDLIM1|MB|PRDX1|PRX|OLR1|APOE|MBL2|SNCA|GPX1|TPM4|GPX3|GSS|KRT1|SOD2|PRDX6|SEPP1|SOD1|SELP|ATRN|TF|GCLC|VNN1|ERCC3|CAT|CRYAA|CRYAB
51384	6.3454e-07	1.719e-05	21	97	910	14228	response to glucocorticoid stimulus	BCHE|TGFB1|GOT1|HBG1|GPX3|SERPINF1|HGF|ADIPOQ|SERPINE1|IGFBP2|APOA2|LCAT|SERPINA7|AGT|UBE2L3|CPN1|GHR|FABP4|CPS1|ALDOB|A2M
44281	6.4862e-07	1.739e-05	132	1367	910	14228	small molecule metabolic process	ENO1|ENO3|PNP|FPGT|PTGDS|MED1|ADIPOQ|TALDO1|MIF|ACSL3|PGD|RBP4|BCAM|CACNB4|MTHFD1|SLC27A6|FAR1|HPRT1|IL6ST|HPD|SLC27A2|ATP6V1A|H6PD|GLO1|AK1|EIF5A2|ACAT2|ACACA|ADH4|LDHB|LDHA|MAN2A1|C9|APOH|LARGE|TPR|PGK1|APOF|LTA4H|APOE|APOB|GGT5|PDHA2|TGFB1|GOT1|HBG1|FUCA2|GGH|IGF1|BHMT|GCLC|VNN1|CPS1|FASN|IARS|GPI|B4GALT1|ACY1|HEXB|PCSK9|GPT|DBH|PEPD|GHR|CA1|CA2|RARS|LBP|EIF5A|WARS|TPI1|GPX1|GSTO1|GPX3|PGAM1|B…
51351	6.5025e-07	1.739e-05	18	74	910	14228	positive regulation of ligase activity	ANAPC7|PSMA7|PSMB6|PSMD9|PSMA6|PSMA3|C6|PSMA4|PSMB5|PSMA1|PSMA2|PSMB3|CDH1|PSMB1|UBE2N|FBXO5|NHEJ1|SKP1
51336	6.8325e-07	1.8156e-05	50	377	910	14228	regulation of hydrolase activity	ECM1|POP1|PDCD6|SERPINE1|GDI2|HP|TNC|PPP2R4|GM2A|CDH1|RAG1|GPX1|APOA2|APOA1|F2|TBC1D1|RCN1|TBC1D2|ANGPTL3|ANG|ALDOB|CRYAA|CRYAB|DSC1|PAFAH1B1|CSTB|VCP|LRP1|CST6|THBS1|EGFR|HSP90B1|CST3|VTN|P2RY6|C6|C9|APOH|TBC1D12|SNCA|CASP8AP2|HSPA5|SORT1|APOC3|AGT|FKBP1A|TF|APOC2|APOC1|RAB3GAP2
902	7.1115e-07	1.8778e-05	44	314	910	14228	cell morphogenesis	SPON2|LAMA5|APP|SPTBN4|COL18A1|NRP2|POP1|NOTCH4|LAMC1|TAZ|CLU|EGFR|GLI3|EFNB1|ALCAM|PTPRZ1|TNN|PDPN|NRCAM|APOE|BBS7|CAP1|LAMB2|HGF|ITGA1|MST1|RAB3IP|LAMB1|RTN4RL2|MYO7A|L1CAM|BMP7|SOD1|EXT1|CDK5|ALMS1|S100A6|B3GNT2|MYH9|S100A4|CRYAA|PAM|PVRL1|PAFAH1B1
31399	7.2438e-07	1.9007e-05	49	367	910	14228	regulation of protein modification process	ITGB3|HP|TAZ|GHR|PSMD9|PPP2R4|CDH1|FBXO5|CAMP|SKP1|ANAPC7|HGF|ADIPOQ|APOA1|MIF|F2|TICAM1|PSMA6|PSMA3|PSMA4|PSMA1|PSMA2|CRYAA|IL6ST|CD44|ENG|EGFR|PSMA7|THBS4|PSMB6|HPX|VTN|C6|PSMB5|PSMB3|PSMB1|SNCA|TGFB1|HSPA5|EIF2AK1|IGF1|BMP7|AGT|FKBP1A|CCDC88A|GCLC|CDK5|UBE2N|CLC
19318	7.9708e-07	2.0784e-05	31	186	910	14228	hexose metabolic process	GPI|H6PD|B4GALT1|GPT|ENO1|ENO3|LDHB|LDHA|UGP2|MAN2A1|FPGT|PGK1|PDHA2|TPI1|MDH1|PKM2|PGAM1|AGL|FUCA2|ADIPOQ|AKR1A1|TALDO1|PGD|RBP4|PKM|CPS1|ALDOB|IL6ST|ALDOA|CRYAB|GAPDH
19835	8.8748e-07	2.2997e-05	9	19	910	14228	cytolysis	C5|C6|C8G|C7|C9|C8B|APOL1|PFN1|C8A
9967	9.5366e-07	2.456e-05	40	276	910	14228	positive regulation of signal transduction	ECM1|CSF1|TRAF3IP2|UBE3A|NENF|PRL|THBS1|EGFR|AKAP12|GHR|HPX|LGALS1|TSPAN6|FLNA|S100A12|NCAM1|APOL3|GPX1|TGFB1|GOT1|F10|HGF|ADIPOQ|MIF|IGF1|L1CAM|TICAM1|ZDHHC17|AGT|FKBP1A|TF|CAT|UBE2N|CDH13|S100A4|RBCK1|CLC|IL6ST|CD44|FGFR1
6639	1.0797e-06	2.7634e-05	14	48	910	14228	acylglycerol metabolic process	GPX1|APOA2|PCSK9|APOC3|CPS1|FAP|APOH|CAT|ALMS1|APOC1|ANG|APOE|IL6ST|APOB
10562	1.107e-06	2.799e-05	25	134	910	14228	positive regulation of phosphorus metabolic process	ITGB3|HP|THBS1|EGFR|THBS4|GHR|HPX|VTN|PPP2R4|CAMP|TGFB1|HGF|ADIPOQ|MIF|IGF1|F2|BMP7|AGT|FAP|ANG|CLC|CRYAA|IL6ST|CD44|ENG
45937	1.107e-06	2.799e-05	25	134	910	14228	positive regulation of phosphate metabolic process	ITGB3|HP|THBS1|EGFR|THBS4|GHR|HPX|VTN|PPP2R4|CAMP|TGFB1|HGF|ADIPOQ|MIF|IGF1|F2|BMP7|AGT|FAP|ANG|CLC|CRYAA|IL6ST|CD44|ENG
6641	1.2333e-06	3.0996e-05	13	42	910	14228	triglyceride metabolic process	GPX1|APOA2|PCSK9|APOC3|CPS1|FAP|APOH|CAT|ALMS1|APOC1|APOE|IL6ST|APOB
30030	1.2451e-06	3.1104e-05	48	363	910	14228	cell projection organization	SPON2|LAMA5|APP|SPTBN4|NRP2|CAPG|DNAH9|LAMC1|TAZ|CLU|EGFR|GLI3|EFNB1|ALCAM|PTPRZ1|CDH1|TNN|MYO6|ARFIP2|NRCAM|APOE|BBS7|CEP290|LAMB2|GPR98|HGF|ITGA1|RAB3IP|LAMB1|RTN4RL2|MYO7A|L1CAM|BMP7|SOD1|EXT1|CCDC88A|CDK5|ALMS1|S100A6|B3GNT2|MYH9|CDH13|PAM|PVRL1|CD44|VCL|PAFAH1B1|FGFR1
32269	1.3443e-06	3.3385e-05	32	200	910	14228	negative regulation of cellular protein metabolic process	ITGB3|TAZ|PSMA7|SERPINA5|PSMB6|PSMD9|C6|PSMB5|APOM|PPP2R4|PSMB3|CDH1|PSMB1|FBXO5|TIMP1|SNCA|TGFB1|ANAPC7|IGFBP5|EIF2AK1|EIF2AK4|F2|PSMA6|PSMA3|GCLC|PSMA4|PSMA1|CDK5|PSMA2|ANG|CALR|ENG
45785	1.3583e-06	3.3532e-05	17	70	910	14228	positive regulation of cell adhesion	ECM2|SDC4|CSF1|L1CAM|NID1|THBS1|SELP|VTN|LGALS1|EGFLAM|SPP1|KDR|SAA1|SAA2|CDH13|HRG|UTRN
51443	1.6809e-06	4.1251e-05	17	71	910	14228	positive regulation of ubiquitin-protein ligase activity	ANAPC7|PSMA7|PSMB6|PSMD9|PSMA6|PSMA3|C6|PSMA4|PSMB5|PSMA1|PSMA2|PSMB3|CDH1|PSMB1|UBE2N|FBXO5|SKP1
9987	1.7289e-06	4.2181e-05	660	9321	910	14228	cellular process	ITSN2|PGLYRP2|RNH1|POP1|SERPINE1|ENO1|SMC3|FNBP1L|RPL8|ENO3|NDST1|PSMD9|ISLR|ALCAM|SCN11A|OBFC1|PIP4K2C|PRSS3|MED1|SAP30BP|SECISBP2|SERPINF1|STARD9|DAPK3|RNASE6|RNASE2|MED4|HSPG2|SND1|HCFC1|RBP4|BCAM|MTHFD1|RFX6|MYL1|DAAM2|PSME4|HECW1|FAR1|RBCK1|HPRT1|HPD|GPLD1|EXD1|CFD|ENPEP|NCAPH|GIGYF2|C2|HPX|ADH4|LDHB|C5|LDHA|C6|ADAMTS13|C7|C9|PRDX1|MYO6|PCDHA5|S100A12|ST3GAL5|LTA4H|ATRIP|NHEJ1|MCTS1|CADM1|EI…
10740	1.7649e-06	4.2809e-05	34	222	910	14228	positive regulation of intracellular protein kinase cascade	ECM1|TRAF3IP2|NENF|PRL|THBS1|EGFR|AKAP12|GHR|HPX|LGALS1|TSPAN6|FLNA|S100A12|APOL3|GPX1|TGFB1|GOT1|F10|HGF|ADIPOQ|MIF|IGF1|TICAM1|ZDHHC17|AGT|FKBP1A|TF|UBE2N|S100A4|RBCK1|CLC|IL6ST|CD44|FGFR1
50900	1.8303e-06	4.414e-05	16	64	910	14228	leukocyte migration	VCAM1|B4GALT1|HGF|ITGA1|SFTPD|MSN|MIF|DBH|ICAM1|SELP|SAA1|SAA2|MYH9|LBP|S100A9|PF4
45765	1.8738e-06	4.4929e-05	19	87	910	14228	regulation of angiogenesis	ECM1|WARS|RNH1|SERPINF1|HGF|SPINK5|SERPINE1|KRT1|THBS1|THBS4|EFNA1|C5|TF|C6|C7|APOH|ANGPTL3|CAMP|PF4
42127	1.9866e-06	4.736e-05	89	848	910	14228	regulation of cell proliferation	COL18A1|ECM1|FLT1|SPARC|B4GALT1|CSF1|ITGB3|FLT4|SERPINE1|HP|LAMC1|DBH|BRCA2|TAZ|CLU|PTPRF|FGFRL1|GLI3|RPS4X|CDH5|PNP|CAPNS1|CHL1|KDR|TRIM24|TIMP2|WDR6|TIMP1|CAMP|EIF5A|MED1|WARS|GPX1|IGFBP5|SERPINF1|HGF|SFTPD|NME2|MIF|PDCD1LG2|TICAM1|OSMR|NME1|CREB3|RBP4|AZGP1|S100A6|CDH13|ANG|IL6ST|TKT|ENG|CCL14|LAMA5|GRN|EIF5A2|PLG|THBS1|EGFR|THBS4|EFNB1|C7|GPNMB|APOH|APOE|IGFBP6|DISC1|MCTS1|MARCKSL1|VCAM1|TGFB…
65009	2.0385e-06	4.8321e-05	106	1061	910	14228	regulation of molecular function	APP|CSF1|POP1|PDCD6|SERPINE1|HP|TNC|PARK7|ICAM1|PSMD9|CDH1|FBXO5|RAG1|SKP1|ANAPC7|HGF|APLP1|MIF|TICAM1|CACNB4|RBCK1|DSC1|VCP|SDC4|HSP90B1|VTN|C5|C6|C9|APOH|APOE|TBC1D12|NHEJ1|TGFB1|HSPA5|BMP7|EFNA1|CCDC88A|TF|CDK5|UBE2N|HRG|ECM1|FLT1|ITGB3|GDI2|PCSK9|TAZ|GHR|PPP2R4|GM2A|YWHAG|CAP1|GPX1|ITGA1|APOA2|APOA1|F2|NME1|PSMA6|TBC1D1|PSMA3|RCN1|TBC1D2|PSMA4|PSMA1|PSMA2|CAT|ANGPTL3|ANG|ALDOB|CRYAA|CRYAB|PAF…
9888	2.0584e-06	4.8518e-05	81	751	910	14228	tissue development	APP|COL18A1|ECM1|NRP2|B4GALT1|CSF1|PLXND1|CTSZ|SERPINE1|SERPINA10|HP|TNC|LAMC1|TAZ|ENO3|GLI3|GHR|CA2|BASP1|CFL1|KDR|DAG1|BBS7|IGFBP1|SRGN|MED1|POSTN|GPX1|IGFBP5|KRT2|HGF|SPINK5|KRT1|MIF|DCN|KRT9|MINPP1|ACTA1|CACNB2|RBP4|RCN1|BTD|CACNB4|S100A4|PFN1|DSC1|CD44|VCL|ENG|LAMA5|NOTCH4|PLG|CST6|KRT85|EGFR|TTN|EFNB1|GPNMB|SPP1|LTA4H|SKIL|SPEN|GSN|TGFB1|LAMB2|AMBN|IGF1|BMP7|AGT|EXT1|FKBP1A|EXT2|COL3A1|COL1…
31398	2.2122e-06	5.1694e-05	20	96	910	14228	positive regulation of protein ubiquitination	ANAPC7|HSPA5|TICAM1|PSMA7|PSMB6|FKBP1A|PSMD9|PSMA6|PSMA3|C6|PSMA4|PSMB5|PSMA1|PSMA2|PSMB3|CDH1|PSMB1|UBE2N|FBXO5|SKP1
51128	2.2179e-06	5.1694e-05	63	539	910	14228	regulation of cellular component organization	POP1|SERPINE1|HP|PCSK9|TAZ|CLU|PTPRF|LGALS1|CAPZB|TMSB4X|CFL1|KDR|SACS|NEFM|NRCAM|MBL2|EIF5A|AHSG|ADIPOQ|SFTPD|APOA2|APOA1|MIF|HCFC1|TIAM1|MYH9|CDH13|KIF20B|ALDOA|S100A9|SPTBN4|SPTBN5|SDC4|EIF5A2|CAPG|THBS1|CST3|VTN|TPR|PDPN|SPP1|APOE|DISC1|SKIL|SPTBN1|SNCA|GSN|TGFB1|APOC3|ARPC5|IGF1|BMP7|EFNA1|CCDC88A|COL5A1|FAP|APOC2|APOC1|UBE2N|PLXNB2|CALR|PAM|PVRL1
44248	2.2483e-06	5.211e-05	83	777	910	14228	cellular catabolic process	RNH1|USP38|POP1|HEXB|PCSK9|UBE3A|DBH|MPO|UBE2L3|SMG6|PSMD9|PNP|LAMP1|GM2A|CDH1|PRX|LBP|CTSD|SKP1|MED1|USP8|DFFA|GPX1|ANAPC7|GPX3|ADIPOQ|PLA2G4C|RNASE6|AKR1A1|APOA2|RAD23A|RNASE2|UCHL3|PSMA6|BACE2|PSMA3|BCAM|PSMA4|MTHFD1|PSMA1|PSMA2|CAT|UBE2V2|ANGPTL3|BLVRB|MYH9|RBCK1|HPD|SLC27A2|DNASE1L3|PCYOX1|VCP|PON1|PLG|PSMA7|HSP90B1|PSMB6|PDE11A|C6|ADAMTS13|PSMB5|PSMB3|PRDX1|PSMB1|APOE|APOB|CBR3|TGFB1|MDH1|G…
51437	2.2856e-06	5.2682e-05	16	65	910	14228	positive regulation of ubiquitin-protein ligase activity involved in mitotic cell cycle	ANAPC7|PSMA7|PSMB6|PSMD9|PSMA6|PSMA3|C6|PSMA4|PSMB5|PSMA1|PSMA2|PSMB3|CDH1|PSMB1|FBXO5|SKP1
5996	2.378e-06	5.4511e-05	33	215	910	14228	monosaccharide metabolic process	GPI|H6PD|B4GALT1|HEXB|GPT|ENO1|ENO3|LDHB|LDHA|UGP2|MAN2A1|FPGT|LARGE|PGK1|PDHA2|TPI1|MDH1|PKM2|PGAM1|AGL|FUCA2|ADIPOQ|AKR1A1|TALDO1|PGD|RBP4|PKM|CPS1|ALDOB|IL6ST|ALDOA|CRYAB|GAPDH
6662	2.4164e-06	5.5088e-05	14	51	910	14228	glycerol ether metabolic process	GPX1|APOA2|PCSK9|APOC3|CPS1|FAP|APOH|CAT|ALMS1|APOC1|ANG|APOE|IL6ST|APOB
10811	2.5614e-06	5.8076e-05	11	32	910	14228	positive regulation of cell-substrate adhesion	VTN|ECM2|EGFLAM|SDC4|CSF1|SPP1|KDR|CDH13|UTRN|NID1|THBS1
42493	2.5901e-06	5.841e-05	37	256	910	14228	response to drug	COL18A1|CPB2|PARK7|ENO3|SERPINA7|THBS1|ACACA|RAD54B|LGALS1|CDH3|PNP|SCN11A|CDH1|B2M|SNCA|CAP1|ABCA2|BCHE|TGFB1|GPX3|ADIPOQ|IGFBP2|APOA2|GGH|MIF|SOD2|YWHAZ|SOD1|NME1|FABP3|FABP4|CPS1|LOX|APOC2|BLMH|TOP1|ALDOB
32989	2.8688e-06	6.4347e-05	46	352	910	14228	cellular component morphogenesis	SPON2|LAMA5|APP|SPTBN4|COL18A1|NRP2|POP1|NOTCH4|LAMC1|TAZ|CLU|EGFR|GLI3|TTN|EFNB1|ALCAM|PTPRZ1|TNN|PDPN|NRCAM|APOE|BBS7|CAP1|LAMB2|HGF|ITGA1|MST1|RAB3IP|LAMB1|RTN4RL2|MYO7A|L1CAM|BMP7|SOD1|EXT1|ACTA1|CDK5|ALMS1|S100A6|B3GNT2|MYH9|S100A4|CRYAA|PAM|PVRL1|PAFAH1B1
43066	3.1469e-06	7.0209e-05	48	375	910	14228	negative regulation of apoptosis	FCMR|GSTP1|GLO1|SERPINE1|AMIGO2|TNFAIP3|MPO|CLU|THBS1|EGFR|HSP90B1|COMP|APOH|CFL1|APOE|RAG1|SNCA|EIF5A|DFFA|GPX1|HSPA5|API5|SORT1|GSS|HGF|NME2|MIF|IGF1|SOD2|YWHAZ|PRDX6|AGT|SOD1|TF|GCLC|PROC|VNN1|CAT|ALB|G2E3|CDH13|CLC|HRG|CRYAA|CRYAB|CD44|PF4|FGFR1
42743	3.3811e-06	7.5032e-05	10	27	910	14228	hydrogen peroxide metabolic process	GPX1|GPX3|PRDX1|CAT|PRX|PARK7|SOD2|MPO|PRDX6|SOD1
60548	3.6476e-06	8.0518e-05	49	388	910	14228	negative regulation of cell death	FCMR|SERPINE1|TNFAIP3|MPO|CLU|COMP|CFL1|RAG1|EIF5A|DFFA|GPX1|HGF|NME2|MIF|YWHAZ|CAT|G2E3|CDH13|CRYAA|CRYAB|CD44|GSTP1|GLO1|AMIGO2|THBS1|EGFR|HSP90B1|APOH|APOE|SNCA|HSPA5|API5|SORT1|GSS|IGF1|SOD2|BMP7|PRDX6|AGT|SOD1|TF|GCLC|PROC|VNN1|ALB|CLC|HRG|PF4|FGFR1
51049	3.8036e-06	8.352e-05	60	513	910	14228	regulation of transport	B4GALT1|POP1|ITGB3|ZC3H3|SERPINE1|TNC|PCSK9|DBI|TAZ|KRT20|GLI3|PSMD9|CDH1|MBL2|SRGN|AHSG|SLC30A5|HGF|ADIPOQ|SFTPD|APOA2|APOA1|MIF|F2|CREB3|RBP4|CACNB4|RFX6|CDH13|ANG|LCP1|CRYAA|CRYAB|LRP1|PON1|TXN|THBS1|EGFR|CPLX3|VTN|C5|PRDX1|MYO6|FLNA|APOE|SNCA|ABCA2|TGFB1|CADM1|APOC3|AGT|FKBP1A|CDK5|FAP|APOC2|APOC1|SAA1|SAA2|CALR|HRG
43691	3.9286e-06	8.5811e-05	8	17	910	14228	reverse cholesterol transport	APOM|APOC2|APOA2|APOA1|APOC3|LCAT|APOE|CLU
48514	3.9694e-06	8.6145e-05	33	220	910	14228	blood vessel morphogenesis	LAMA5|GPI|COL18A1|ENPEP|FLT1|B4GALT1|PLXND1|ITGB3|NOTCH4|DBH|THBS1|ANPEP|KDR|APOE|APOB|SPEN|GPX1|ITGA4|MMP2|IGF1|HSPG2|AGT|SELP|PTPRB|CEACAM1|FAP|ANGPTL3|MYH9|CDH13|CSPG4|ANG|ENG|FGFR1
18904	3.9851e-06	8.6145e-05	14	53	910	14228	organic ether metabolic process	GPX1|APOA2|PCSK9|APOC3|CPS1|FAP|APOH|CAT|ALMS1|APOC1|ANG|APOE|IL6ST|APOB
48468	4.1833e-06	8.9963e-05	70	632	910	14228	cell development	SPON2|APP|COL18A1|NRP2|B4GALT1|POP1|TNC|LAMC1|BRCA2|CLU|GLI3|ALCAM|CDH1|TNN|CFL1|KDR|NRCAM|FBXO5|TIMP1|CEP290|GPX1|HGF|ITGA1|RTN4RL2|MYO7A|ACTA1|CACNB2|RBP4|RCN1|OLFM3|CACNB4|S100A6|B3GNT2|MYH9|S100A4|ANG|CRYAA|CRYAB|DSC1|CD44|PAFAH1B1|ENG|LAMA5|SPTBN4|NOTCH4|NTN4|EGFR|TTN|EFNB1|PTPRZ1|MYO6|APOE|GSN|LAMB2|GPR98|LAMB1|IGF1|L1CAM|SOD2|BMP7|AGT|SOD1|EXT1|CDK5|ALMS1|HRG|SHBG|PAM|PVRL1|FGFR1
35239	4.3141e-06	9.23e-05	31	201	910	14228	tube morphogenesis	LAMA5|B4GALT1|CSF1|PLXND1|NOTCH4|CTSZ|HP|HBB|GLI3|KNG1|CDH1|CFL1|PDPN|KDR|DAG1|APOE|BBS7|SPEN|MED1|GPX1|TGFB1|ITGA1|IGF1|SOD2|BMP7|AGT|SOD1|GCLC|PFN1|CD44|ENG
43069	4.5539e-06	9.6933e-05	48	380	910	14228	negative regulation of programmed cell death	FCMR|GSTP1|GLO1|SERPINE1|AMIGO2|TNFAIP3|MPO|CLU|THBS1|EGFR|HSP90B1|COMP|APOH|CFL1|APOE|RAG1|SNCA|EIF5A|DFFA|GPX1|HSPA5|API5|SORT1|GSS|HGF|NME2|MIF|IGF1|SOD2|YWHAZ|PRDX6|AGT|SOD1|TF|GCLC|PROC|VNN1|CAT|ALB|G2E3|CDH13|CLC|HRG|CRYAA|CRYAB|CD44|PF4|FGFR1
44255	4.602e-06	9.746e-05	63	551	910	14228	cellular lipid metabolic process	HEXB|PCSK9|GPT|TAZ|GHR|GM2A|PRX|PIP4K2C|LBP|PTGDS|TPI1|GPX1|GGPS1|ADIPOQ|PLA2G4C|APOA2|APOA1|MIF|ACSL3|RBP4|CAT|ANGPTL3|SLC27A6|FAR1|PIK3C3|ANG|IL6ST|SLC27A2|GPLD1|PAFAH1B1|CFD|PON1|LCAT|ACAT2|ACACA|OC90|ADH4|APOH|ALOX5|LARGE|PDPN|SPP2|ST3GAL5|LTA4H|APOE|APOB|SNCA|GGT5|PLA2G2D|PNPLA8|HBG1|RARRES2|APOC3|PRDX6|FABP3|PIKFYVE|FABP4|CPS1|FAP|FASN|ALMS1|APOC1|LPIN2
10324	4.845e-06	0.00010157	33	222	910	14228	membrane invagination	ITSN2|CRP|FCN1|APP|UNQ5811|FCN2|LRP1|DENND1A|CLTC|UBE3A|FNBP1L|THBS1|ASGR2|GHR|MRC2|MYO6|MRC1|CD14|APOE|LBP|MBL2|SNCA|CAP1|CD93|SORT1|AHSG|SFTPD|APLP1|MYO7A|IGF2R|NME1|CDK5|ELMO1
6897	4.845e-06	0.00010157	33	222	910	14228	endocytosis	ITSN2|CRP|FCN1|APP|UNQ5811|FCN2|LRP1|DENND1A|CLTC|UBE3A|FNBP1L|THBS1|ASGR2|GHR|MRC2|MYO6|MRC1|CD14|APOE|LBP|MBL2|SNCA|CAP1|CD93|SORT1|AHSG|SFTPD|APLP1|MYO7A|IGF2R|NME1|CDK5|ELMO1
51439	5.299e-06	0.00011054	16	69	910	14228	regulation of ubiquitin-protein ligase activity involved in mitotic cell cycle	ANAPC7|PSMA7|PSMB6|PSMD9|PSMA6|PSMA3|C6|PSMA4|PSMB5|PSMA1|PSMA2|PSMB3|CDH1|PSMB1|FBXO5|SKP1
70271	5.37e-06	0.00011091	59	507	910	14228	protein complex biogenesis	AHCTF1|GPT|IL1RAP|LAMC1|TAZ|CCT6B|ALAD|TUBB8|PSMD9|C1QTNF1|CDH1|TUBB1|TRIM24|KNTC1|FBXO5|FGB|MED1|FGA|HSP90AA1|VWF|GPX3|ADIPOQ|FGG|MIF|MED4|OLFM1|RBP4|CAT|TCP1|KCNQ5|ANG|HPRT1|ALDOB|CRYAA|CRYAB|APCS|VCP|COX15|CAPG|TTN|C9|SPP2|FLNA|SKIL|GSN|TGFB1|LAMB2|HSPA4|GSS|GTF2H1|TBCA|SOD2|FAH|FKBP1A|ERCC3|CDK5|CALR|HRG|OTC
6461	5.37e-06	0.00011091	59	507	910	14228	protein complex assembly	AHCTF1|GPT|IL1RAP|LAMC1|TAZ|CCT6B|ALAD|TUBB8|PSMD9|C1QTNF1|CDH1|TUBB1|TRIM24|KNTC1|FBXO5|FGB|MED1|FGA|HSP90AA1|VWF|GPX3|ADIPOQ|FGG|MIF|MED4|OLFM1|RBP4|CAT|TCP1|KCNQ5|ANG|HPRT1|ALDOB|CRYAA|CRYAB|APCS|VCP|COX15|CAPG|TTN|C9|SPP2|FLNA|SKIL|GSN|TGFB1|LAMB2|HSPA4|GSS|GTF2H1|TBCA|SOD2|FAH|FKBP1A|ERCC3|CDK5|CALR|HRG|OTC
6629	5.4801e-06	0.00011263	86	832	910	14228	lipid metabolic process	HEXB|PCSK9|GPT|DBI|TAZ|SERPINA6|CLU|GHR|GM2A|PRX|LIPN|ENPP2|PIP4K2C|LBP|PTGDS|TPI1|GPX1|GGPS1|ADIPOQ|PLA2G4C|APOA2|APOA1|MIF|ACSL3|RBP4|AZGP1|CAT|ANGPTL3|SLC27A6|FAR1|PIK3C3|ANG|IL6ST|PAFAH1B3|SLC27A2|GPLD1|PAFAH1B1|CFD|LRP1|PON1|GDPD1|LCAT|PLA2G7|ACAT2|CPN2|ACACA|CPN1|OC90|ADH4|APOL4|C9|APOH|ALOX5|LARGE|PDPN|APOF|SPP2|ST3GAL5|APOD|LTA4H|APOE|APOB|APOL1|PLTP|APOL3|SNCA|GGT5|ABCA2|PLA2G2D|PNPLA8|H…
51340	5.5342e-06	0.00011318	18	85	910	14228	regulation of ligase activity	ANAPC7|PSMA7|PSMB6|PSMD9|PSMA6|PSMA3|C6|PSMA4|PSMB5|PSMA1|PSMA2|PSMB3|CDH1|PSMB1|UBE2N|FBXO5|NHEJ1|SKP1
5975	5.848e-06	0.00011901	60	520	910	14228	carbohydrate metabolic process	GPI|PGLYRP2|B4GALT1|HEXB|GPT|ENO1|ENO3|NDST1|GM2A|FPGT|CTBS|ST6GAL1|TPI1|ABCC8|PGAM1|ADIPOQ|AKR1A1|TALDO1|PGD|POMGNT1|DCN|CHIT1|RBP4|PKM|B3GNT6|ANGPTL3|CHI3L1|B3GNT2|ALDOB|HAGH|IL6ST|ALDOA|CRYAB|GAPDH|ITIH4|ITIH2|H6PD|GLO1|GDPD1|SLC3A2|ITIH1|LDHB|LDHA|EGFLAM|UGP2|MAN2A1|LARGE|PGK1|ST3GAL5|GALNT7|PDHA2|MDH1|GOT1|PKM2|AGL|FUCA2|EXT1|EXT2|CPS1|IL17A
51186	5.8958e-06	0.0001194	31	204	910	14228	cofactor metabolic process	H6PD|COX15|GLO1|IREB2|DBI|ACACA|ALAD|HPX|ADH4|LDHB|PNP|CBR3|GGT5|TPI1|GPX1|MDH1|AMBP|GPX3|EIF2AK1|GSR|TALDO1|SOD2|PGD|SOD1|GCLC|VNN1|MTHFD1|CAT|BLVRB|ALDOB|HAGH
8228	6.0187e-06	0.00012072	5	6	910	14228	opsonization	CRP|FCN1|FCN2|LBP|MBL2
34384	6.0187e-06	0.00012072	5	6	910	14228	high-density lipoprotein particle clearance	APOM|APOC2|APOA2|APOA1|APOE
51436	7.3461e-06	0.00014664	15	63	910	14228	negative regulation of ubiquitin-protein ligase activity involved in mitotic cell cycle	ANAPC7|PSMA7|PSMB6|PSMD9|PSMA6|PSMA3|C6|PSMA4|PSMB5|PSMA1|PSMA2|PSMB3|CDH1|PSMB1|FBXO5
31099	7.9892e-06	0.00015797	17	79	910	14228	regeneration	IGFBP1|GSN|GPX1|TGFB1|LAMB2|HGF|SERPINE1|SERPINA10|APOA2|RTN4RL2|PLG|IGF1|ENO3|IGF2R|AXL|APOH|APOE
31397	7.9892e-06	0.00015797	17	79	910	14228	negative regulation of protein ubiquitination	ANAPC7|PSMA7|PSMB6|PSMD9|PSMA6|PSMA3|GCLC|C6|PSMA4|PSMB5|PSMA1|CDK5|PSMA2|PSMB3|CDH1|PSMB1|FBXO5
42327	8.5393e-06	0.00016767	23	131	910	14228	positive regulation of phosphorylation	TGFB1|ITGB3|HGF|ADIPOQ|MIF|IGF1|F2|BMP7|THBS1|EGFR|AGT|THBS4|GHR|HPX|VTN|FAP|ANG|CLC|CRYAA|IL6ST|CAMP|CD44|ENG
31396	8.5603e-06	0.00016767	22	122	910	14228	regulation of protein ubiquitination	ANAPC7|HSPA5|TICAM1|PSMA7|PSMB6|FKBP1A|PSMD9|PSMA6|PSMA3|GCLC|C6|PSMA4|PSMB5|PSMA1|CDK5|PSMA2|PSMB3|CDH1|PSMB1|UBE2N|FBXO5|SKP1
44085	9.6415e-06	0.00018796	101	1034	910	14228	cellular component biogenesis	APP|HP|IL1RAP|CCT6B|TUBB8|PSMD9|RPS17|CDH1|TUBB1|TRIM24|ARFIP2|NRCAM|KNTC1|FBXO5|MED1|ACTN1|ADIPOQ|MIF|MYO7A|MED4|OLFM1|RBP4|LOX|KCNQ5|HPRT1|TLN1|VCL|VCP|COX15|ACAT2|HSP90B1|APOM|C9|ZNHIT6|MYO6|APOE|APOB|SKIL|TGFB1|CADM1|HIST1H4L|HSPA4|RAB3IP|TBCA|CCDC88A|CDK5|CALR|HRG|AHCTF1|ITGB3|GPT|LAMC1|TAZ|ALAD|SART1|C1QTNF1|NEFM|CTSD|FGB|FGA|HSP90AA1|VWF|GPX3|FGG|APOA2|HAUS3|APOA1|DDX51|ACTA1|CAT|TCP1|CDH1…
34375	9.8655e-06	0.00019144	7	14	910	14228	high-density lipoprotein particle remodeling	APOM|APOC1|APOA2|APOA1|APOC3|LCAT|APOE
35468	1.0069e-05	0.00019449	47	380	910	14228	positive regulation of signaling pathway	ECM1|FLT1|CSF1|TRAF3IP2|ITGB3|UBE3A|NENF|PRL|THBS1|EGFR|AKAP12|GHR|HPX|VTN|LGALS1|TSPAN6|FLNA|S100A12|NCAM1|LBP|DISC1|APOL3|GPX1|TGFB1|GOT1|F10|HGF|ADIPOQ|MIF|IGF1|L1CAM|TICAM1|BMP7|ZDHHC17|AGT|FKBP1A|TF|CAT|UBE2N|CDH13|S100A4|RBCK1|CLC|IL6ST|CD44|ENG|FGFR1
9605	1.024e-05	0.00019677	62	553	910	14228	response to external stimulus	NRP2|PGLYRP2|LECT2|PCSK9|BRCA2|SERPINA7|GHR|ENPP2|LBP|CTSD|SLC34A3|SERPINF1|HGF|ADIPOQ|ITGA1|SFTPD|IGFBP2|MIF|ACSL3|RNASE2|DCN|CREB3|ACTA1|RBP4|ALDOB|IL6ST|S100A9|S100A8|CD44|ENG|SERPINC1|PON1|ACAT2|CNN2|C5|LDHA|C7|ALOX5|SPP1|A2M|BCHE|VCAM1|GSN|TGFB1|SERPIND1|HSPA5|EIF2AK1|GPR98|GSS|EIF2AK4|PPBP|SOD2|BMP7|IGF2R|SOD1|TF|CPS1|AXL|ALB|SAA1|SAA2|PF4
10876	1.0282e-05	0.00019677	25	151	910	14228	lipid localization	HEXB|LCAT|CLU|ACAT2|APOL4|APOM|GM2A|C9|APOH|APOF|APOE|LBP|APOB|APOL1|PLTP|APOL3|APOA2|APOA1|APOC3|RBP4|FAP|APOC2|APOC1|ANGPTL3|SLC27A6
43933	1.0935e-05	0.00020832	76	723	910	14228	macromolecular complex subunit organization	AHCTF1|GPT|IL1RAP|LAMC1|TAZ|MPO|CCT6B|ALAD|TUBB8|PSMD9|SART1|C1QTNF1|CDH1|TUBB1|TRIM24|KNTC1|FBXO5|FGB|MED1|FGA|HSP90AA1|VWF|GPX3|ADIPOQ|FGG|APOA2|APOA1|MIF|BAZ1B|MED4|OLFM1|RBP4|CAT|TCP1|KCNQ5|ANG|HPRT1|ALDOB|CRYAA|CRYAB|APCS|VCP|COX15|LCAT|CAPG|ACAT2|TTN|APOM|C9|ZNHIT6|SPP2|FLNA|APOE|APOB|SKIL|GSN|SF3A2|TGFB1|LAMB2|HIST1H4L|HSPA4|GSS|APOC3|GTF2H1|TBCA|SOD2|FAH|AGT|FKBP1A|ERCC3|CDK5|APOC2|APOC1|…
904	1.1122e-05	0.00021091	34	241	910	14228	cell morphogenesis involved in differentiation	SPON2|LAMA5|APP|SPTBN4|COL18A1|NRP2|POP1|NOTCH4|LAMC1|GLI3|EFNB1|ALCAM|PTPRZ1|TNN|NRCAM|APOE|LAMB2|HGF|LAMB1|RTN4RL2|MYO7A|L1CAM|BMP7|SOD1|EXT1|CDK5|S100A6|B3GNT2|MYH9|S100A4|CRYAA|PAM|PVRL1|PAFAH1B1
33700	1.1317e-05	0.00021364	6	10	910	14228	phospholipid efflux	APOC2|APOC1|APOA2|APOA1|APOC3|APOE
9991	1.3353e-05	0.00024939	36	264	910	14228	response to extracellular stimulus	SERPINC1|PCSK9|BRCA2|SERPINA7|ACAT2|GHR|LDHA|C7|ALOX5|SPP1|A2M|CTSD|SLC34A3|BCHE|VCAM1|GSN|TGFB1|HSPA5|SERPINF1|GSS|ADIPOQ|IGFBP2|EIF2AK4|ACSL3|SOD2|BMP7|IGF2R|SOD1|ACTA1|RBP4|CPS1|AXL|ALB|ALDOB|IL6ST|CD44
50708	1.3477e-05	0.00024939	15	66	910	14228	regulation of protein secretion	SRGN|TGFB1|CADM1|POP1|HGF|APOA2|APOA1|MIF|KRT20|RBP4|C5|FAP|SAA1|SAA2|ANG
42542	1.3477e-05	0.00024939	15	66	910	14228	response to hydrogen peroxide	GPX1|GPX3|PARK7|SOD2|MPO|PRDX6|SOD1|TF|MB|PRDX1|CAT|PRX|OLR1|CRYAA|CRYAB
6800	1.3477e-05	0.00024939	15	66	910	14228	oxygen and reactive oxygen species metabolic process	GPX1|GPX3|SFTPD|PARK7|SOD2|MPO|SOD3|PRDX6|AGT|SOD1|CCS|PRDX1|CAT|PRX|CRYAB
51438	1.351e-05	0.00024939	17	82	910	14228	regulation of ubiquitin-protein ligase activity	ANAPC7|PSMA7|PSMB6|PSMD9|PSMA6|PSMA3|C6|PSMA4|PSMB5|PSMA1|PSMA2|PSMB3|CDH1|PSMB1|UBE2N|FBXO5|SKP1
35295	1.4466e-05	0.00026467	39	297	910	14228	tube development	LAMA5|B4GALT1|SDC4|CSF1|PLXND1|ITGB3|NOTCH4|CTSZ|HP|HBB|GLI3|KNG1|CDH1|MAN2A1|CFL1|PDPN|KDR|DAG1|LTA4H|APOE|BBS7|SPEN|MED1|GPX1|TGFB1|ITGA1|SFTPD|IGF1|SOD2|BMP7|AGT|SOD1|RBP4|GCLC|LOX|PFN1|CD44|ENG|FGFR1
44282	1.4528e-05	0.00026467	36	265	910	14228	small molecule catabolic process	GPI|H6PD|PON1|ENO1|DBH|ENO3|ADH4|LDHB|LDHA|PDE11A|PNP|PGK1|LBP|CBR3|MED1|PDHA2|TPI1|MDH1|GOT1|PKM2|PGAM1|ADIPOQ|AKR1A1|TALDO1|PGD|FAH|BCAM|PKM|MTHFD1|FAP|ALDOB|ALDOA|HPD|SLC27A2|GAPDH|PCYOX1
61061	1.4528e-05	0.00026467	36	265	910	14228	muscle structure development	LAMA5|APP|LAMA2|POP1|TNC|PLG|TAZ|FGFRL1|TTN|LGALS1|C7|ANKRD2|SKIL|GPX1|IGFBP5|SORT1|ARID5B|IGF1|AGT|DCN|FKBP1A|ACTA1|CACNB2|RBP4|RCN1|CACNB4|CDK5|FAP|MYL1|MYH9|TAGLN2|HRG|UTRN|CRYAB|DSC1|ENG
51223	1.5444e-05	0.00028015	24	145	910	14228	regulation of protein transport	SRGN|TGFB1|CADM1|POP1|HGF|APOA2|APOA1|MIF|TXN|TAZ|KRT20|EGFR|GLI3|RBP4|C5|CDK5|FAP|CDH1|PRDX1|SAA1|FLNA|SAA2|ANG|LCP1
9308	1.559e-05	0.00028157	49	409	910	14228	amine metabolic process	PGLYRP2|ACY1|HEXB|DBH|PEPD|GHR|NDST1|RARS|CTBS|MED1|WARS|BHMT2|APOA2|APOA1|PGD|DCN|CHIT1|BCAM|MTHFD1|B3GNT6|CHI3L1|HPD|PAFAH1B1|ITIH4|ITIH2|PON1|LCAT|ITIH1|EGFLAM|TPR|SPP2|HARS|SNCA|GGT5|AOC3|BCHE|GOT1|GSS|GGH|FAH|AGT|EXT1|EXT2|BHMT|FABP3|GCLC|CPS1|IARS|OTC
51352	1.6351e-05	0.00029278	15	67	910	14228	negative regulation of ligase activity	ANAPC7|PSMA7|PSMB6|PSMD9|PSMA6|PSMA3|C6|PSMA4|PSMB5|PSMA1|PSMA2|PSMB3|CDH1|PSMB1|FBXO5
51444	1.6351e-05	0.00029278	15	67	910	14228	negative regulation of ubiquitin-protein ligase activity	ANAPC7|PSMA7|PSMB6|PSMD9|PSMA6|PSMA3|C6|PSMA4|PSMB5|PSMA1|PSMA2|PSMB3|CDH1|PSMB1|FBXO5
51919	1.6631e-05	0.00029525	4	4	910	14228	positive regulation of fibrinolysis	F12|F11|PLG|KLKB1
22617	1.6631e-05	0.00029525	4	4	910	14228	extracellular matrix disassembly	LAMB2|PLG|LAMC1|ENG
48545	1.6956e-05	0.00029974	32	225	910	14228	response to steroid hormone stimulus	SERPINE1|LCAT|BRCA2|SERPINA7|THBS1|UBE2L3|CPN1|GHR|CA2|SPP1|A2M|CAP1|ABCA2|BCHE|TGFB1|GOT1|HBG1|GPX3|SERPINF1|HGF|ADIPOQ|IGFBP2|APOA2|BMP7|AGT|ACTA1|TF|FABP4|CPS1|LOX|ALDOB|CRYAB
51004	1.7126e-05	0.00030021	8	20	910	14228	regulation of lipoprotein lipase activity	FKBP1A|PPP2R4|SORT1|APOH|APOC2|APOC1|ANGPTL3|APOC3
7157	1.7126e-05	0.00030021	8	20	910	14228	heterophilic cell-cell adhesion	SELP|VCAM1|CADM1|ITGA4|AMIGO2|L1CAM|PVRL1|ICAM1
50679	1.7526e-05	0.00030594	12	45	910	14228	positive regulation of epithelial cell proliferation	MED1|GRN|TGFB1|B4GALT1|LAMB2|KDR|NME2|LAMB1|IGF1|LAMC1|EGFR|NME1
10873	1.995e-05	0.00034536	5	7	910	14228	positive regulation of cholesterol esterification	APOC1|APOA2|APOA1|APOE|AGT
60192	1.995e-05	0.00034536	5	7	910	14228	negative regulation of lipase activity	SORT1|APOC1|ANGPTL3|APOA2|APOC3
7156	2.0586e-05	0.0003549	23	138	910	14228	homophilic cell adhesion	ITGB1|CD84|CADM1|PCDHGC5|AMIGO2|L1CAM|PTPRF|PCDHA10|CDH6|CDH5|CEACAM1|CDH3|CNR2|CDH1|CDH11|PCDHA5|CDH13|DSG2|DSG3|DSC1|DSC2|PVRL1|DSC3
7010	2.0828e-05	0.00035758	52	448	910	14228	cytoskeleton organization	HP|BRCA2|SMC3|KRT20|SGOL1|CAPZB|TMSB4X|CFL1|TUBB1|ARHGDIB|DAG1|ARFIP2|NEFM|FBXO5|CAP1|HAUS3|MIF|SMC1A|ANK1|KRT9|ACTA1|DAAM2|ELMO1|MYH9|ANG|LCP1|CRYAA|PFN1|TLN1|ALDOA|CRYAB|S100A9|PAFAH1B1|LAMA5|SPTBN4|SPTBN5|DCTN2|HSP90B1|TTN|CNN2|FLNA|APOE|DISC1|GSN|XB|ARPC5|SOD1|DIAPH3|CDK5|KRT14|CALR|RAN
65003	2.1013e-05	0.00035929	71	675	910	14228	macromolecular complex assembly	AHCTF1|GPT|IL1RAP|LAMC1|TAZ|CCT6B|ALAD|TUBB8|PSMD9|SART1|C1QTNF1|CDH1|TUBB1|TRIM24|KNTC1|FBXO5|FGB|MED1|FGA|HSP90AA1|VWF|GPX3|ADIPOQ|FGG|APOA2|APOA1|MIF|MED4|OLFM1|RBP4|CAT|TCP1|KCNQ5|ANG|HPRT1|ALDOB|CRYAA|CRYAB|APCS|VCP|COX15|CAPG|ACAT2|TTN|APOM|C9|ZNHIT6|SPP2|FLNA|APOE|APOB|SKIL|GSN|SF3A2|TGFB1|LAMB2|HIST1H4L|HSPA4|GSS|APOC3|GTF2H1|TBCA|SOD2|FAH|FKBP1A|ERCC3|CDK5|APOC1|CALR|HRG|OTC
46486	2.1214e-05	0.00036125	26	167	910	14228	glycerolipid metabolic process	CFD|PON1|PCSK9|LCAT|TAZ|APOH|APOE|PIP4K2C|APOB|GPX1|PLA2G4C|APOA2|APOA1|APOC3|FABP3|PIKFYVE|CPS1|FAP|CAT|ALMS1|APOC1|PIK3C3|ANG|IL6ST|GPLD1|PAFAH1B1
302	2.6059e-05	0.00043992	17	86	910	14228	response to reactive oxygen species	GPX1|GPX3|SERPINE1|PARK7|SOD2|MPO|PRDX6|SOD1|TF|MB|PRDX1|CAT|PRX|OLR1|APOE|CRYAA|CRYAB
33344	2.6119e-05	0.00043992	8	21	910	14228	cholesterol efflux	APOM|APOC2|APOC1|APOA2|APOA1|APOC3|APOE|ACAT2
10810	2.615e-05	0.00043992	13	54	910	14228	regulation of cell-substrate adhesion	ECM2|SDC4|CSF1|PLG|NID1|THBS1|VTN|LGALS1|EGFLAM|SPP1|KDR|CDH13|UTRN
6916	2.6261e-05	0.00044001	29	199	910	14228	anti-apoptosis	FCMR|GSTP1|GLO1|AMIGO2|TNFAIP3|MPO|CLU|THBS1|HSP90B1|COMP|CFL1|APOE|SNCA|GPX1|HSPA5|API5|GSS|HGF|IGF1|SOD2|YWHAZ|SOD1|TF|GCLC|VNN1|CDH13|HRG|CRYAA|CRYAB
30029	2.6494e-05	0.00044214	34	251	910	14228	actin filament-based process	SPTBN5|HP|HSP90B1|TTN|CNN2|CAPZB|TMSB4X|MYO6|CFL1|ARHGDIB|FLNA|ARFIP2|CAP1|GSN|XB|ARPC5|MIF|MYO7A|ACTA1|DIAPH3|CDK5|MYL1|DAAM2|ELMO1|MYH9|ANG|LCP1|CALR|CRYAA|PFN1|TLN1|ALDOA|S100A9|PAFAH1B1
6749	2.8256e-05	0.00046966	9	27	910	14228	glutathione metabolic process	GGT5|GCLC|GPX1|GPX3|GLO1|GSR|HAGH|SOD2|SOD1
48589	2.882e-05	0.00047714	20	113	910	14228	developmental growth	IGFBP1|MED1|APP|GSN|GPX1|TGFB1|CSF1|IGFBP5|LAMB2|SPINK5|SERPINE1|SERPINA10|UBE3A|PLG|IGF1|BRCA2|ENO3|GLI3|ALMS1|SHBG
7399	3.2246e-05	0.00052993	108	1156	910	14228	nervous system development	SPON2|APP|HP|UBE3A|BZW2|CLU|NDST1|LGALS1|ALCAM|NAGLU|CDH1|TNN|CFL1|TUBB1|NRCAM|MED1|TPM3|SERPINF1|HGF|DAPK3|APLP1|MYO7A|ACSL3|PGD|FOXP2|PCDHA10|OLFM1|TIAM1|OLFM3|BTD|S100A6|PFN1|DSC1|SPTBN4|EFNB1|MYO6|PCDHA5|APOE|APOB|SKIL|NHEJ1|TGFB1|CADM1|HSPA5|HBG1|GPR98|IGF1|L1CAM|BMP7|EXT1|EFNA1|CCDC88A|CDK5|PLXNB2|CNTN3|CALR|HRG|PAM|SIM2|ITM2B|FGFR1|NRP2|HEXB|PCSK9|LAMC1|BRCA2|PPP1R9A|PTPRF|GLI3|CHL1|PRX|TI…
6518	3.2263e-05	0.00052993	13	55	910	14228	peptide metabolic process	GGT5|PGCP|PGLYRP2|GPX1|GPX3|GLO1|GSR|SOD2|SOD1|GCLC|ADAMTS13|HAGH|PAM
31667	3.2903e-05	0.00053832	33	243	910	14228	response to nutrient levels	SERPINC1|PCSK9|BRCA2|SERPINA7|ACAT2|GHR|C7|ALOX5|SPP1|A2M|CTSD|SLC34A3|BCHE|VCAM1|GSN|TGFB1|HSPA5|SERPINF1|GSS|ADIPOQ|IGFBP2|EIF2AK4|ACSL3|SOD2|BMP7|IGF2R|SOD1|RBP4|CPS1|ALB|ALDOB|IL6ST|CD44
1525	3.4427e-05	0.00056106	24	152	910	14228	angiogenesis	SPEN|LAMA5|GPI|COL18A1|ENPEP|FLT1|GPX1|B4GALT1|PLXND1|ITGB3|MMP2|NOTCH4|HSPG2|THBS1|PTPRB|CEACAM1|ANPEP|KDR|MYH9|CDH13|CSPG4|ANG|ENG|FGFR1
31347	3.536e-05	0.00057183	25	162	910	14228	regulation of defense response	SERPINC1|SERPINE1|HPX|C6|CNR2|APOE|LBP|A2M|GPX1|CADM1|AHSG|SERPINF1|F12|HGF|ADIPOQ|TICAM1|OSMR|AGT|FABP4|SCGB1A1|SAA1|SAA2|MASP1|IL6ST|KLKB1
1775	3.5363e-05	0.00057183	36	276	910	14228	cell activation	ITGB1|CSF1|ITIH1|EGFR|ICAM1|ADAMTS13|LBP|NHEJ1|RAG1|SNCA|FGB|FGA|VCAM1|TGFB1|ITGA4|CD93|VWF|KRT2|HGF|FGG|GP1BA|F2|TICAM1|GP6|YWHAZ|AGT|TREML1|FKBP1A|COL3A1|IRF1|SAA1|SAA2|MYH9|LCP1|CLC|PF4
70201	3.8411e-05	0.00061722	24	153	910	14228	regulation of establishment of protein localization	SRGN|TGFB1|CADM1|POP1|HGF|APOA2|APOA1|MIF|TXN|TAZ|KRT20|EGFR|GLI3|RBP4|C5|CDK5|FAP|CDH1|PRDX1|SAA1|FLNA|SAA2|ANG|LCP1
42157	3.8465e-05	0.00061722	16	80	910	14228	lipoprotein metabolic process	LRP1|APOA2|PCSK9|APOA1|APOC3|LCAT|ZDHHC17|APOL4|APOM|FNTB|APOC1|OLR1|APOE|APOB|APOL1|APOL3
44262	4.0245e-05	0.0006433	45	378	910	14228	cellular carbohydrate metabolic process	GPI|H6PD|B4GALT1|HEXB|GDPD1|GPT|ENO1|ENO3|LDHB|LDHA|UGP2|MAN2A1|FPGT|LARGE|PGK1|ST3GAL5|GALNT7|ST6GAL1|PDHA2|TPI1|MDH1|GOT1|PKM2|PGAM1|AGL|FUCA2|ADIPOQ|AKR1A1|TALDO1|PGD|POMGNT1|EXT1|EXT2|RBP4|PKM|CPS1|B3GNT6|ANGPTL3|B3GNT2|ALDOB|IL6ST|ALDOA|CRYAB|GAPDH|IL17A
31145	4.1041e-05	0.00065353	14	64	910	14228	anaphase-promoting complex-dependent proteasomal ubiquitin-dependent protein catabolic process	ANAPC7|PSMA7|PSMB6|PSMD9|PSMA6|PSMA3|C6|PSMA4|PSMB5|PSMA1|PSMA2|PSMB3|CDH1|PSMB1
6790	4.1208e-05	0.00065368	21	125	910	14228	sulfur metabolic process	GGT5|GPX1|GPX3|GLO1|BHMT2|GSR|IGF1|SOD2|DCN|SOD1|SULF2|EXT1|GHR|NDST1|TPST1|EXT2|BHMT|GCLC|EGFLAM|MTHFD1|HAGH
10647	4.165e-05	0.0006582	48	413	910	14228	positive regulation of cell communication	ECM1|FLT1|CSF1|TRAF3IP2|ITGB3|UBE3A|NENF|PRL|THBS1|EGFR|AKAP12|GHR|HPX|VTN|LGALS1|TSPAN6|FLNA|S100A12|NCAM1|LBP|DISC1|APOL3|SNCA|GPX1|TGFB1|GOT1|F10|HGF|ADIPOQ|MIF|IGF1|L1CAM|TICAM1|BMP7|ZDHHC17|AGT|FKBP1A|TF|CAT|UBE2N|CDH13|S100A4|RBCK1|CLC|IL6ST|CD44|ENG|FGFR1
8284	4.259e-05	0.00067052	52	460	910	14228	positive regulation of cell proliferation	COL18A1|ECM1|FLT1|B4GALT1|CSF1|ITGB3|FLT4|LAMC1|TAZ|CLU|RPS4X|PNP|CAPNS1|CHL1|KDR|TIMP1|CAMP|EIF5A|MED1|HGF|NME2|MIF|PDCD1LG2|TICAM1|OSMR|NME1|S100A6|CDH13|ANG|IL6ST|TKT|CCL14|GRN|EIF5A2|EGFR|THBS4|EFNB1|C7|DISC1|MCTS1|MARCKSL1|VCAM1|TGFB1|LAMB2|LAMB1|IGF1|AGT|TF|FABP4|CALR|HRG|FGFR1
52548	4.2928e-05	0.0006733	18	98	910	14228	regulation of endopeptidase activity	CASP8AP2|VCP|GPX1|HSPA5|PDCD6|SERPINE1|HP|F2|THBS1|VTN|TF|C6|CDH1|C9|CRYAA|CRYAB|RAG1|SNCA
48754	4.805e-05	0.0007508	17	90	910	14228	branching morphogenesis of a tube	SPEN|LAMA5|MED1|TGFB1|B4GALT1|CSF1|PLXND1|NOTCH4|CTSZ|IGF1|BMP7|GLI3|AGT|KDR|DAG1|CD44|ENG
6082	4.8913e-05	0.00076144	61	570	910	14228	organic acid metabolic process	GPI|ACY1|GPT|DBH|PEPD|GHR|PNP|RARS|LBP|PTGDS|WARS|TPI1|GSTO1|BHMT2|ADIPOQ|PLA2G4C|AKR1A1|MIF|ACSL3|PGD|RBP4|BCAM|MTHFD1|ANGPTL3|SLC27A6|FAR1|ALDOB|HPD|SLC27A2|PON1|ACACA|ADH4|LDHB|UGP2|C9|ALOX5|TPR|PDPN|LTA4H|HARS|SNCA|GGT5|MDH1|GOT1|PNPLA8|HBG1|GSS|GGH|IGF1|FAH|AGT|BHMT|FABP3|GCLC|FABP4|CPS1|FAP|FASN|IARS|LPIN2|OTC
10872	5.0388e-05	0.00078149	5	8	910	14228	regulation of cholesterol esterification	APOC1|APOA2|APOA1|APOE|AGT
16044	5.1994e-05	0.00080341	45	382	910	14228	cellular membrane organization	ITSN2|CRP|FCN1|APP|UNQ5811|FCN2|LRP1|DENND1A|CLTC|UBE3A|TAZ|FNBP1L|THBS1|EGFR|ASGR2|SERPINA5|GHR|MRC2|MYO6|MRC1|NRCAM|CD14|APOE|LBP|MBL2|SNCA|CAP1|HSP90AA1|VDP|CD93|SORT1|AHSG|HSPA4|SFTPD|APLP1|MYO7A|IGF2R|SOD1|NME1|CCDC88A|COL5A1|CDK5|ELMO1|PAFAH1B1|FTL
48585	5.2457e-05	0.00080757	21	127	910	14228	negative regulation of response to stimulus	GPX1|TGFB1|AMBP|AHSG|SERPINC1|SERPINF1|ADIPOQ|SPINK5|SERPINE1|MIF|PTPRF|C5|COL3A1|CNR2|SPP1|SAA1|SAA2|APOE|MASP1|A2M|CD44
48666	5.4519e-05	0.00083623	40	326	910	14228	neuron development	SPON2|APP|SPTBN4|NRP2|NTN4|LAMC1|CLU|EGFR|GLI3|EFNB1|ALCAM|PTPRZ1|CDH1|TNN|MYO6|NRCAM|APOE|CEP290|LAMB2|GPR98|HGF|ITGA1|LAMB1|RTN4RL2|MYO7A|L1CAM|SOD2|BMP7|SOD1|EXT1|OLFM3|CDK5|ALMS1|S100A6|B3GNT2|PAM|PVRL1|CD44|PAFAH1B1|FGFR1
61024	5.5385e-05	0.00084639	45	383	910	14228	membrane organization	ITSN2|CRP|FCN1|APP|UNQ5811|FCN2|LRP1|DENND1A|CLTC|UBE3A|TAZ|FNBP1L|THBS1|EGFR|ASGR2|SERPINA5|GHR|MRC2|MYO6|MRC1|NRCAM|CD14|APOE|LBP|MBL2|SNCA|CAP1|HSP90AA1|VDP|CD93|SORT1|AHSG|HSPA4|SFTPD|APLP1|MYO7A|IGF2R|SOD1|NME1|CCDC88A|COL5A1|CDK5|ELMO1|PAFAH1B1|FTL
50731	5.8679e-05	0.00089346	13	58	910	14228	positive regulation of peptidyl-tyrosine phosphorylation	ITGB3|HGF|ADIPOQ|MIF|IGF1|AGT|THBS4|GHR|HPX|VTN|CLC|IL6ST|CD44
51129	5.8932e-05	0.00089405	26	177	910	14228	negative regulation of cellular component organization	SPTBN4|SPTBN5|HP|CAPG|CLU|THBS1|PTPRF|CST3|LGALS1|CAPZB|TMSB4X|TPR|SPP1|SACS|SPTBN1|SNCA|GSN|TGFB1|ADIPOQ|APOA2|APOA1|APOC3|BMP7|FAP|APOC2|APOC1
55072	6.0101e-05	0.00090848	10	36	910	14228	iron ion homeostasis	HPX|TF|IREB2|HP|LCN2|SOD2|CP|FTL|SOD1|LTF
31400	6.2158e-05	0.00093619	22	138	910	14228	negative regulation of protein modification process	TGFB1|ANAPC7|TAZ|PSMA7|PSMB6|PSMD9|PSMA6|PSMA3|GCLC|C6|PSMA4|PSMB5|PPP2R4|PSMA1|CDK5|PSMA2|PSMB3|CDH1|PSMB1|FBXO5|ENG|SNCA
7517	6.2921e-05	0.00094426	30	219	910	14228	muscle organ development	LAMA5|APP|LAMA2|POP1|TNC|TAZ|FGFRL1|TTN|C7|ANKRD2|SKIL|GPX1|IGFBP5|ARID5B|IGF1|DCN|FKBP1A|ACTA1|CACNB2|RBP4|RCN1|CACNB4|CDK5|MYL1|TAGLN2|HRG|UTRN|CRYAB|DSC1|ENG
43436	6.351e-05	0.00094631	60	563	910	14228	oxoacid metabolic process	GPI|ACY1|GPT|DBH|PEPD|GHR|RARS|LBP|PTGDS|WARS|TPI1|GSTO1|BHMT2|ADIPOQ|PLA2G4C|AKR1A1|MIF|ACSL3|PGD|RBP4|BCAM|MTHFD1|ANGPTL3|SLC27A6|FAR1|ALDOB|HPD|SLC27A2|PON1|ACACA|ADH4|LDHB|UGP2|C9|ALOX5|TPR|PDPN|LTA4H|HARS|SNCA|GGT5|MDH1|GOT1|PNPLA8|HBG1|GSS|GGH|IGF1|FAH|AGT|BHMT|FABP3|GCLC|FABP4|CPS1|FAP|FASN|IARS|LPIN2|OTC
19752	6.351e-05	0.00094631	60	563	910	14228	carboxylic acid metabolic process	GPI|ACY1|GPT|DBH|PEPD|GHR|RARS|LBP|PTGDS|WARS|TPI1|GSTO1|BHMT2|ADIPOQ|PLA2G4C|AKR1A1|MIF|ACSL3|PGD|RBP4|BCAM|MTHFD1|ANGPTL3|SLC27A6|FAR1|ALDOB|HPD|SLC27A2|PON1|ACACA|ADH4|LDHB|UGP2|C9|ALOX5|TPR|PDPN|LTA4H|HARS|SNCA|GGT5|MDH1|GOT1|PNPLA8|HBG1|GSS|GGH|IGF1|FAH|AGT|BHMT|FABP3|GCLC|FABP4|CPS1|FAP|FASN|IARS|LPIN2|OTC
9057	6.4452e-05	0.00095692	55	503	910	14228	macromolecule catabolic process	PGLYRP2|RNH1|USP38|POP1|PCSK9|UBE3A|UBE2L3|SMG6|PSMD9|CDH1|CTBS|SKP1|MED1|USP8|DFFA|ANAPC7|RNASE6|RAD23A|RNASE2|UCHL3|CHIT1|PSMA6|BACE2|PSMA3|PSMA4|PSMA1|PSMA2|UBE2V2|CHI3L1|MYH9|RBCK1|DNASE1L3|PCYOX1|VCP|PLG|PSMA7|HSP90B1|PSMB6|C6|PSMB5|PSMB3|PSMB1|APOE|AGA|APOB|TGFB1|HSPA5|GTF2H1|UBE2G2|SOD1|FKBP1A|CPS1|ERCC3|CDK5|UBE2N
6869	6.9483e-05	0.0010263	22	139	910	14228	lipid transport	APOA2|APOA1|APOC3|LCAT|CLU|ACAT2|APOL4|RBP4|APOM|FAP|C9|APOH|APOC2|APOC1|APOF|SLC27A6|APOE|LBP|APOB|APOL1|PLTP|APOL3
42180	6.9618e-05	0.0010263	61	577	910	14228	cellular ketone metabolic process	GPI|ACY1|GPT|DBH|PEPD|GHR|RARS|LBP|PTGDS|WARS|TPI1|GSTO1|BHMT2|ADIPOQ|PLA2G4C|AKR1A1|MIF|ACSL3|PGD|RBP4|BCAM|MTHFD1|ANGPTL3|SLC27A6|FAR1|ALDOB|HPD|SLC27A2|PON1|ACACA|ADH4|LDHB|UGP2|C9|ALOX5|TPR|PDPN|LTA4H|HARS|CBR3|SNCA|GGT5|MDH1|GOT1|PNPLA8|HBG1|GSS|GGH|IGF1|FAH|AGT|BHMT|FABP3|GCLC|FABP4|CPS1|FAP|FASN|IARS|LPIN2|OTC
6022	7.0151e-05	0.0010305	14	67	910	14228	aminoglycan metabolic process	ITIH4|PGLYRP2|ITIH2|HEXB|ITIH1|DCN|EXT1|CHIT1|NDST1|EXT2|EGFLAM|B3GNT6|CHI3L1|CTBS
6879	7.2474e-05	0.0010609	9	30	910	14228	cellular iron ion homeostasis	HPX|TF|IREB2|HP|LCN2|CP|FTL|SOD1|LTF
42744	7.2915e-05	0.0010636	7	18	910	14228	hydrogen peroxide catabolic process	GPX1|GPX3|PRDX1|CAT|PRX|MPO|PRDX6
6519	7.5757e-05	0.0011012	43	365	910	14228	cellular amino acid and derivative metabolic process	ACY1|GLO1|EIF5A2|PON1|LCAT|DBH|PEPD|GHR|RARS|TPR|HARS|SNCA|EIF5A|GGT5|BCHE|WARS|GPX1|GOT1|GPX3|GSS|BHMT2|GSR|APOA2|GGH|APOA1|SOD2|PGD|FAH|AGT|SOD1|BHMT|FABP3|GCLC|BCAM|VNN1|MTHFD1|CPS1|IARS|HAGH|HPD|PAFAH1B1|OTC|PCYOX1
50707	7.7683e-05	0.0011237	10	37	910	14228	regulation of cytokine secretion	SRGN|C5|CADM1|FAP|POP1|APOA2|SAA1|APOA1|SAA2|MIF
34380	7.8916e-05	0.0011237	4	5	910	14228	high-density lipoprotein particle assembly	APOM|APOA2|APOA1|APOE
34382	7.8916e-05	0.0011237	4	5	910	14228	chylomicron remnant clearance	APOC2|APOC1|APOC3|APOE
51005	7.8916e-05	0.0011237	4	5	910	14228	negative regulation of lipoprotein lipase activity	SORT1|APOC1|ANGPTL3|APOC3
10901	7.8916e-05	0.0011237	4	5	910	14228	regulation of very-low-density lipoprotein particle remodeling	APOC2|APOA2|APOA1|APOC3
7021	7.8916e-05	0.0011237	4	5	910	14228	tubulin complex assembly	TCP1|TBCA|CRYAA|CRYAB
60538	8.3216e-05	0.0011809	14	68	910	14228	skeletal muscle organ development	APP|GPX1|IGFBP5|TNC|TAZ|FGFRL1|DCN|ACTA1|CACNB2|RCN1|CACNB4|CDK5|DSC1|SKIL
31175	8.5152e-05	0.0012042	32	244	910	14228	neuron projection development	SPON2|APP|SPTBN4|NRP2|LAMC1|CLU|EGFR|GLI3|EFNB1|ALCAM|PTPRZ1|CDH1|TNN|MYO6|NRCAM|APOE|LAMB2|HGF|ITGA1|LAMB1|RTN4RL2|L1CAM|BMP7|EXT1|CDK5|S100A6|B3GNT2|PAM|PVRL1|CD44|PAFAH1B1|FGFR1
51240	9.3585e-05	0.001319	35	278	910	14228	positive regulation of multicellular organismal process	SPTBN4|CPB2|B4GALT1|CSF1|POP1|SERPINE1|PLG|DBH|THBS1|EGFR|GHR|C5|CA2|APOH|ALOX5|SPP1|CD14|LBP|SNCA|TGFB1|F12|HGF|F2|TICAM1|BMP7|AGT|SOD1|TF|CPS1|SAA1|SAA2|HRG|IL6ST|PF4|FGFR1
16042	9.4677e-05	0.0013299	26	182	910	14228	lipid catabolic process	HEXB|PLA2G7|OC90|GM2A|PRX|LIPN|ENPP2|APOE|LBP|APOB|PLA2G2D|PNPLA8|ADIPOQ|PLA2G4C|APOA2|APOC3|PRDX6|AZGP1|CPS1|FAP|APOC2|ANGPTL3|CLC|PAFAH1B3|SLC27A2|PAFAH1B1
10627	9.5482e-05	0.0013368	39	323	910	14228	regulation of intracellular protein kinase cascade	ECM1|TRAF3IP2|TNFAIP3|NENF|PRL|THBS1|EGFR|AKAP12|GHR|HPX|LGALS1|TSPAN6|PRDX1|TIMP2|DAG1|FLNA|S100A12|APOL3|GPX1|TGFB1|GOT1|F10|AMBP|HGF|ADIPOQ|MIF|IGF1|TICAM1|ZDHHC17|AGT|FKBP1A|TF|UBE2N|S100A4|RBCK1|CLC|IL6ST|CD44|FGFR1
32880	9.6645e-05	0.0013485	25	172	910	14228	regulation of protein localization	POP1|TXN|TAZ|KRT20|EGFR|GLI3|C5|CDH1|PRDX1|FLNA|SRGN|TGFB1|CADM1|HGF|APOA2|APOA1|MIF|RBP4|CDK5|FAP|SAA1|SAA2|ANG|LCP1|PAM
34614	9.9443e-05	0.0013829	10	38	910	14228	cellular response to reactive oxygen species	TF|GPX1|GPX3|PRDX1|CAT|PRX|SOD2|MPO|PRDX6|SOD1
30036	0.00010606	0.0014701	31	236	910	14228	actin cytoskeleton organization	SPTBN5|HP|HSP90B1|TTN|CNN2|CAPZB|TMSB4X|CFL1|ARHGDIB|FLNA|ARFIP2|CAP1|GSN|XB|ARPC5|MIF|ACTA1|DIAPH3|CDK5|DAAM2|ELMO1|MYH9|ANG|LCP1|CALR|CRYAA|PFN1|TLN1|ALDOA|S100A9|PAFAH1B1
31638	0.00010739	0.0014835	5	9	910	14228	zymogen activation	APOH|F12|F11|PRSS3|KLKB1
44093	0.00011599	0.001597	65	637	910	14228	positive regulation of molecular function	FLT1|CSF1|PDCD6|ITGB3|HP|ICAM1|GHR|PSMD9|PPP2R4|GM2A|CDH1|FBXO5|SKP1|CAP1|ANAPC7|HGF|ITGA1|APOA1|MIF|F2|TICAM1|NME1|PSMA6|PSMA3|PSMA4|PSMA1|PSMA2|CAT|ANG|RBCK1|ALDOB|VCP|LRP1|SDC4|PON1|ADCY1|THBS1|EGFR|PSMA7|PSMB6|VTN|C5|P2RY6|C6|PSMB5|PSMB3|C9|APOH|PSMB1|APOE|NHEJ1|CASP8AP2|TGFB1|HSPA5|AGT|SOD1|FKBP1A|EFNA1|CCDC88A|TF|CCS|CDK5|APOC2|UBE2N|HRG
32787	0.00012137	0.0016657	37	304	910	14228	monocarboxylic acid metabolic process	GPI|GPT|ACACA|GHR|ADH4|LDHB|UGP2|C9|ALOX5|PDPN|LTA4H|LBP|PTGDS|SNCA|GGT5|TPI1|PNPLA8|HBG1|ADIPOQ|PLA2G4C|AKR1A1|MIF|IGF1|ACSL3|AGT|RBP4|FABP3|FABP4|MTHFD1|FAP|FASN|ANGPTL3|SLC27A6|FAR1|ALDOB|SLC27A2|LPIN2
44236	0.00012615	0.0017255	10	39	910	14228	multicellular organismal metabolic process	GHR|COL3A1|MMP13|COL5A1|FAP|MMP2|XB|PEPD|MMP9|ACACA
7568	0.00013192	0.0017986	22	145	910	14228	aging	EIF5A|VCAM1|GSN|TGFB1|LRP1|SERPINF1|GSS|SERPINE1|IGFBP2|MIF|BRCA2|SOD2|ENO3|SERPINA7|DCN|SOD1|TF|CALR|NCAM2|CRYAB|LIMS1|ENG
1936	0.00014272	0.0019395	11	47	910	14228	regulation of endothelial cell proliferation	TF|ECM1|ITGB3|APOH|KDR|CDH13|ANG|APOE|THBS1|THBS4|ENG
40007	0.00014793	0.0020038	28	208	910	14228	growth	APP|CSF1|SERPINE1|SERPINA10|UBE3A|SLC3A2|PLG|BRCA2|ENO3|GLI3|TNN|IGFBP1|MED1|GSN|GPX1|TGFB1|IGFBP5|LAMB2|SPINK5|ARID5B|IGF1|BMP7|INHBC|INHBE|ACTA1|ALMS1|SHBG|FGFR1
70301	0.00015052	0.0020257	8	26	910	14228	cellular response to hydrogen peroxide	TF|GPX1|GPX3|PRDX1|CAT|PRX|MPO|PRDX6
7435	0.00015052	0.0020257	8	26	910	14228	salivary gland morphogenesis	LAMA5|TGFB1|PLXND1|CDH1|DAG1|BMP7|EGFR|FGFR1
45446	0.00015862	0.0021185	7	20	910	14228	endothelial cell differentiation	LAMA5|COL18A1|GPX1|NOTCH4|KDR|AGT|ENG
14910	0.00015862	0.0021185	7	20	910	14228	regulation of smooth muscle cell migration	VTN|TF|P2RY6|IGFBP5|SERPINE1|IGF1|IL6ST
30100	0.00015894	0.0021185	14	72	910	14228	regulation of endocytosis	TGFB1|AHSG|ADIPOQ|SFTPD|SERPINE1|PCSK9|APOC3|VTN|APOC2|APOC1|CDH13|CALR|MBL2|SNCA
60191	0.0001679	0.0022308	16	90	910	14228	regulation of lipase activity	LRP1|SORT1|HP|APOA2|APOC3|EGFR|AGT|FKBP1A|P2RY6|PPP2R4|APOH|APOC2|APOC1|ANGPTL3|ANG|SNCA
50714	0.00017459	0.002305	11	48	910	14228	positive regulation of protein secretion	RBP4|C5|TGFB1|CADM1|FAP|POP1|HGF|SAA1|SAA2|ANG|MIF
7162	0.00017459	0.002305	11	48	910	14228	negative regulation of cell adhesion	LGALS1|TGFB1|ADIPOQ|SERPINE1|ARHGDIB|CDH13|MIA3|PLG|TGFBI|THBS1|KNG1
8203	0.00019185	0.0025249	16	91	910	14228	cholesterol metabolic process	PON1|APOA2|PCSK9|APOA1|APOC3|LCAT|ACAT2|FAP|CAT|APOC1|APOF|ANGPTL3|APOE|APOB|APOL1|APOL3
48858	0.00019489	0.0025568	30	233	910	14228	cell projection morphogenesis	SPON2|LAMA5|APP|SPTBN4|NRP2|TAZ|CLU|EGFR|GLI3|EFNB1|ALCAM|PTPRZ1|TNN|NRCAM|APOE|BBS7|LAMB2|ITGA1|RAB3IP|RTN4RL2|L1CAM|BMP7|EXT1|CDK5|ALMS1|S100A6|B3GNT2|PAM|PVRL1|PAFAH1B1
50921	0.00019796	0.0025889	10	41	910	14228	positive regulation of chemotaxis	CREB3|TF|TGFB1|C7|HGF|SERPINE1|KDR|CDH13|THBS1|THBS4
2673	0.000202	0.0026182	8	27	910	14228	regulation of acute inflammatory response	C6|F12|HGF|MASP1|IL6ST|A2M|OSMR|KLKB1
7159	0.000202	0.0026182	8	27	910	14228	leukocyte cell-cell adhesion	ITGB1|SELP|VCAM1|ITGA4|OLR1|MSN|L1CAM|ICAM1
51093	0.00020208	0.0026182	35	289	910	14228	negative regulation of developmental process	CRP|ECM1|ITGB3|NOTCH4|LRRC17|SERPINE1|TAZ|THBS1|GLI3|THBS4|CST3|C7|APOH|SPP1|SKIL|SRGN|SPEN|TGFB1|AHSG|HIST1H4L|GPR98|SERPINF1|HGF|ADIPOQ|SPINK5|NME2|IGF1|F2|SOD2|BMP7|NME1|RBP4|CALR|PF4|C1QC
22008	0.00020276	0.0026189	64	637	910	14228	neurogenesis	SPON2|APP|NRP2|PCSK9|LAMC1|CLU|PTPRF|GLI3|LGALS1|ALCAM|CDH1|TNN|TUBB1|TIMP2|NEFM|NRCAM|CEP290|YWHAG|SERPINF1|HGF|ITGA1|DAPK3|RTN4RL2|MYO7A|F2|TIAM1|OLFM3|S100A6|B3GNT2|CD44|PAFAH1B1|SPTBN4|C1S|NTN4|EGFR|EFNB1|PTPRZ1|MYO6|SPP1|APOE|NCAM2|DISC1|SKIL|GSN|TGFB1|LAMB2|GPR98|LAMB1|IGF1|L1CAM|SOD2|BMP7|AGT|SOD1|EXT1|EFNA1|CCDC88A|CDK5|ALMS1|PLXNB2|CALR|PAM|PVRL1|FGFR1
14911	0.00020346	0.0026199	5	10	910	14228	positive regulation of smooth muscle cell migration	VTN|TF|P2RY6|IGF1|IL6ST
32369	0.00020425	0.0026219	6	15	910	14228	negative regulation of lipid transport	ITGB3|APOC2|APOC1|APOA2|APOC3|THBS1
1934	0.0002113	0.0027041	19	120	910	14228	positive regulation of protein amino acid phosphorylation	TGFB1|ITGB3|HGF|ADIPOQ|MIF|IGF1|F2|BMP7|AGT|THBS4|GHR|HPX|VTN|CLC|CRYAA|IL6ST|CAMP|CD44|ENG
19725	0.00021766	0.0027659	50	466	910	14228	cellular homeostasis	APP|HEXB|HP|PARK7|PRX|QSOX1|SLC34A3|PDIA3|GPX1|SLC30A5|ADIPOQ|F2|ERP70|CACNB4|IL6ST|ALDOA|FTL|LTF|CCL14|IREB2|PLG|TXN|KNG1|HSP90B1|HPX|C7|CNR2|PRDX1|LARGE|APOE|CD55|SNCA|TGFB1|HBG1|GSS|GSR|SOD2|CP|PRDX6|DNAJC16|AGT|SOD1|ERP44|TF|GCLC|CDK5|LCN2|SAA1|SAA2|CALR
43281	0.00021871	0.0027659	16	92	910	14228	regulation of caspase activity	CASP8AP2|VCP|GPX1|HSPA5|PDCD6|HP|F2|THBS1|TF|C6|CDH1|C9|CRYAA|CRYAB|RAG1|SNCA
43161	0.00021878	0.0027659	21	140	910	14228	proteasomal ubiquitin-dependent protein catabolic process	VCP|ANAPC7|HSPA5|RAD23A|UBE2G2|PSMA7|HSP90B1|PSMB6|PSMD9|PSMA6|PSMA3|C6|PSMA4|PSMB5|PSMA1|PSMA2|PSMB3|CDH1|PSMB1|RBCK1|SKP1
10498	0.00021878	0.0027659	21	140	910	14228	proteasomal protein catabolic process	VCP|ANAPC7|HSPA5|RAD23A|UBE2G2|PSMA7|HSP90B1|PSMB6|PSMD9|PSMA6|PSMA3|C6|PSMA4|PSMB5|PSMA1|PSMA2|PSMB3|CDH1|PSMB1|RBCK1|SKP1
34379	0.00022471	0.0028089	4	6	910	14228	very-low-density lipoprotein particle assembly	APOC1|APOC3|APOB|ACAT2
10955	0.00022471	0.0028089	4	6	910	14228	negative regulation of protein maturation by peptide bond cleavage	SERPINE1|MASP1|A2M|THBS1
10985	0.00022471	0.0028089	4	6	910	14228	negative regulation of lipoprotein particle clearance	APOC2|APOC1|PCSK9|APOC3
43154	0.00022487	0.0028089	7	21	910	14228	negative regulation of caspase activity	GPX1|HSPA5|CRYAA|CRYAB|THBS1|RAG1|SNCA
16265	0.00022936	0.0028564	69	703	910	14228	death	APP|TRAF3IP2|PDCD6|HP|TNFAIP3|DBI|PARK7|C8B|KRT20|C8A|CLU|COMP|LGALS1|C8G|OLR1|CTSD|RAG1|SRGN|SAP30BP|DFFA|GPX1|MAGI3|HGF|DAPK3|APLP1|CKAP2|DNAJB13|F2|TICAM1|TIAM1|PKM|ELMO1|ANG|TOP1|CRYAA|PFN1|CRYAB|MET|DNASE1L3|VCP|LRP1|CD5L|PLG|THBS1|GIGYF2|TTBK2|C5|C6|C7|C9|CD14|APOL1|SNCA|CASP8AP2|GSN|TGFB1|CADM1|PKM2|API5|HBG1|EIF2AK1|L1CAM|SOD2|SOD1|GGCT|TF|ALMS1|ITM2B|IL17A
7519	0.00023639	0.0029352	13	66	910	14228	skeletal muscle tissue development	APP|GPX1|IGFBP5|TNC|TAZ|DCN|ACTA1|CACNB2|RCN1|CACNB4|CDK5|DSC1|SKIL
9719	0.00024975	0.0030919	52	493	910	14228	response to endogenous stimulus	SERPINE1|HP|PCSK9|DBH|BRCA2|SERPINA7|UBE2L3|GHR|MB|CA2|CFL1|DAG1|CAP1|IGFBP1|GPX3|SERPINF1|HGF|ADIPOQ|IGFBP2|APOA2|ACTA1|RBP4|LOX|ANGPTL3|CDH13|ANG|ALDOB|CRYAB|LCAT|ADCY1|THBS1|CPN1|CNR2|SPP1|LTA4H|A2M|ABCA2|BCHE|TGFB1|GOT1|SORT1|HBG1|GSS|GGH|BMP7|AGT|SOD1|FABP3|TF|GCLC|FABP4|CPS1
9893	0.00026057	0.0032005	93	1018	910	14228	positive regulation of metabolic process	KDM5A|APP|CSF1|POP1|ITGB3|HP|PCSK9|HBB|UBE3A|TAZ|GLI3|ICAM1|AKAP12|GHR|RPS4X|PSMD9|PPP2R4|CDH1|FBXO5|RAP80|LBP|CAMP|SKP1|EIF5A|MED1|HSP90AA1|ANAPC7|HGF|ADIPOQ|APOA2|NME2|APOA1|MIF|F2|BAZ1B|TICAM1|PSMA6|CREB3|PSMA3|PSMA4|RFX6|PSMA1|PSMA2|IRF1|NARG1L|ANGPTL3|CDH13|ANG|HPRT1|CRYAA|IL6ST|CD44|ENG|VCP|NOTCH4|EIF5A2|THBS1|EGFR|PSMA7|THBS4|PSMB6|HPX|VTN|C6|PSMB5|PSMB3|MYO6|PSMB1|APOE|SNCA|SPEN|TGFB1|HSP…
51450	0.00026083	0.0032005	3	3	910	14228	myoblast proliferation	GPX1|HGF|IGF1
10903	0.00026083	0.0032005	3	3	910	14228	negative regulation of very-low-density lipoprotein particle remodeling	APOA2|APOA1|APOC3
7431	0.00026708	0.003258	8	28	910	14228	salivary gland development	LAMA5|TGFB1|PLXND1|CDH1|DAG1|BMP7|EGFR|FGFR1
48741	0.00026708	0.003258	8	28	910	14228	skeletal muscle fiber development	ACTA1|CACNB2|APP|RCN1|CACNB4|GPX1|TNC|DSC1
60341	0.0002738	0.0033303	36	305	910	14228	regulation of cellular localization	B4GALT1|POP1|ZC3H3|TNC|TXN|TAZ|KRT20|EGFR|GLI3|CPLX3|PSMD9|C5|CDH1|PRDX1|FLNA|SNCA|SRGN|ABCA2|TGFB1|CADM1|HGF|ADIPOQ|APOA2|APOA1|MIF|AGT|RBP4|RFX6|CDK5|FAP|SAA1|SAA2|ANG|LCP1|CRYAA|CRYAB
48699	0.00027695	0.0033588	60	594	910	14228	generation of neurons	SPON2|APP|NRP2|PCSK9|LAMC1|CLU|PTPRF|GLI3|LGALS1|ALCAM|CDH1|TNN|TUBB1|TIMP2|NEFM|NRCAM|CEP290|YWHAG|SERPINF1|HGF|ITGA1|DAPK3|RTN4RL2|MYO7A|F2|TIAM1|OLFM3|S100A6|B3GNT2|CD44|PAFAH1B1|SPTBN4|NTN4|EGFR|EFNB1|PTPRZ1|MYO6|SPP1|APOE|NCAM2|DISC1|SKIL|TGFB1|LAMB2|GPR98|LAMB1|L1CAM|SOD2|BMP7|SOD1|EXT1|EFNA1|CCDC88A|CDK5|ALMS1|PLXNB2|CALR|PAM|PVRL1|FGFR1
6575	0.00029737	0.003596	24	174	910	14228	cellular amino acid derivative metabolic process	EIF5A|GGT5|BCHE|GPX1|GPX3|GLO1|GSR|EIF5A2|PON1|APOA2|APOA1|LCAT|DBH|SOD2|SOD1|GHR|FABP3|GCLC|VNN1|CPS1|HAGH|PAFAH1B1|PCYOX1|SNCA
44237	0.00030083	0.0036273	367	4977	910	14228	cellular metabolic process	APP|PGLYRP2|RNH1|POP1|ENO1|SMC3|RPL8|ENO3|UBE2L3|CCT6B|NDST1|PSMD9|RPS17|PNP|ANPEP|RPS6KA2|KDR|TRIM24|OBFC1|RAP80|PIP4K2C|HMCN1|PTGDS|SKP1|MED1|ST6GAL1|SECISBP2|DAPK3|RNASE6|TALDO1|MIF|ACSL3|RNASE2|MED4|HCFC1|RBP4|BCAM|MTHFD1|HECW1|FAR1|RBCK1|HPRT1|HPD|GPLD1|EXD1|CFD|EIF5A2|TXN|TTBK1|C2|TTBK2|HPX|ADH4|LDHB|C5|LDHA|C6|ADAMTS13|APOM|C9|APOH|PRDX1|S100A12|ST3GAL5|LTA4H|CD14|APOE|APOB|ATRIP|NHEJ1|SPT…
50920	0.0003086	0.0037103	11	51	910	14228	regulation of chemotaxis	CREB3|C5|TF|TGFB1|C7|HGF|SERPINE1|KDR|CDH13|THBS1|THBS4
3158	0.00031173	0.0037372	7	22	910	14228	endothelium development	LAMA5|COL18A1|GPX1|NOTCH4|KDR|AGT|ENG
8219	0.00031453	0.0037599	68	698	910	14228	cell death	APP|TRAF3IP2|PDCD6|HP|TNFAIP3|DBI|PARK7|C8B|KRT20|C8A|CLU|COMP|LGALS1|C8G|OLR1|CTSD|SRGN|SAP30BP|DFFA|GPX1|MAGI3|HGF|DAPK3|APLP1|CKAP2|DNAJB13|F2|TICAM1|TIAM1|PKM|ELMO1|ANG|TOP1|CRYAA|PFN1|CRYAB|MET|DNASE1L3|VCP|LRP1|CD5L|PLG|THBS1|GIGYF2|TTBK2|C5|C6|C7|C9|CD14|APOL1|SNCA|CASP8AP2|GSN|TGFB1|CADM1|PKM2|API5|HBG1|EIF2AK1|L1CAM|SOD2|SOD1|GGCT|TF|ALMS1|ITM2B|IL17A
6732	0.00031832	0.0037944	22	154	910	14228	coenzyme metabolic process	GGT5|TPI1|GPX1|H6PD|MDH1|GPX3|GLO1|GSR|TALDO1|SOD2|PGD|ACACA|SOD1|LDHB|GCLC|PNP|VNN1|MTHFD1|CAT|ALDOB|HAGH|CBR3
50678	0.00032991	0.0039102	15	86	910	14228	regulation of epithelial cell proliferation	MED1|GRN|GPX1|TGFB1|B4GALT1|LAMB2|SERPINF1|NME2|LAMB1|IGF1|LAMC1|BRCA2|EGFR|NME1|KDR
51222	0.00032991	0.0039102	15	86	910	14228	positive regulation of protein transport	TGFB1|CADM1|POP1|HGF|MIF|EGFR|GLI3|RBP4|C5|FAP|CDH1|SAA1|FLNA|SAA2|ANG
50730	0.00033169	0.0039201	14	77	910	14228	regulation of peptidyl-tyrosine phosphorylation	ITGB3|HGF|ADIPOQ|MIF|IGF1|EGFR|AGT|THBS4|GHR|HPX|VTN|CLC|IL6ST|CD44
35272	0.00033705	0.003961	9	36	910	14228	exocrine system development	LAMA5|TGFB1|PLXND1|CDH1|DAG1|IGF1|BMP7|EGFR|FGFR1
48747	0.00033705	0.003961	9	36	910	14228	muscle fiber development	ACTA1|CACNB2|APP|RCN1|CACNB4|GPX1|TNC|DSC1|TTN
1501	0.00034846	0.0040837	38	332	910	14228	skeletal system development	ECM1|SPARC|HEXB|LRRC17|LECT2|TAZ|EGFR|FGFRL1|GLI3|GHR|COMP|NDST1|CLEC3B|GPNMB|PRDX1|SPP1|SPP2|POSTN|TGFB1|SORT1|AHSG|IGFBP4|MMP2|AMBN|MEPE|ARID5B|IGF1|BMP7|MMP9|EXT1|MINPP1|EXT2|RBP4|COL3A1|COL1A2|BMP1|CDH11|FGFR1
50829	0.00035339	0.0041068	5	11	910	14228	defense response to Gram-negative bacterium	SELP|HGF|SERPINE1|LBP|CAMP
34446	0.00035339	0.0041068	5	11	910	14228	substrate adhesion-dependent cell spreading	LAMA5|POP1|LAMB2|LAMB1|LAMC1
1885	0.00035339	0.0041068	5	11	910	14228	endothelial cell development	COL18A1|GPX1|NOTCH4|AGT|ENG
32103	0.00037553	0.004352	15	87	910	14228	positive regulation of response to external stimulus	TGFB1|HGF|SERPINE1|OSMR|THBS1|AGT|THBS4|CREB3|TF|FABP4|C7|KDR|CDH13|LBP|IL6ST
7626	0.00038382	0.0044349	33	276	910	14228	locomotory behavior	APP|SPTBN4|CSTB|NRP2|HEXB|LECT2|PARK7|DBH|CST6|C5|C7|MYO6|ENPP2|LBP|SNCA|SERPIND1|HGF|ITGA1|SFTPD|MIF|PPBP|RNASE2|SOD2|SOD1|CREB3|CACNB4|SAA1|SAA2|S100A9|S100A8|PAFAH1B1|ENG|PF4
51179	0.00038481	0.0044349	232	2982	910	14228	localization	ITSN2|APP|TRAF3IP2|POP1|FNBP1L|ICAM1|PNP|SCN11A|DAG1|PRSS3|PTGDS|SLC34A3|KRT2|CACNA2D2|CACNA2D4|MIF|MYO7A|ANK1|RBP4|MYL1|KCNQ5|TLN1|CFD|CUTA|SPTBN4|ENPEP|SLC22A2|EIF5A2|TXN|HPX|APOM|C7|C9|APOH|MYO6|APOF|CD14|APOE|APOB|SPTBN1|CTSA|ABCA2|RAB3IP|PPBP|CP|CCDC88A|TF|TCN1|CALR|NRP2|AHCTF1|HEXB|DENND1A|CLTC|GDI2|PCSK9|HBB|MIA3|HBD|SERPINA6|ASGR2|SMG6|AKAP12|MRC2|TMSB4X|MRC1|XPO5|SDF4|NEFM|KIF1B|BBS7|KIF…
43085	0.00041248	0.0047407	56	553	910	14228	positive regulation of catalytic activity	FLT1|CSF1|PDCD6|ITGB3|HP|GHR|PSMD9|PPP2R4|GM2A|CDH1|FBXO5|SKP1|CAP1|ANAPC7|HGF|ITGA1|APOA1|F2|PSMA6|PSMA3|PSMA4|PSMA1|PSMA2|ANG|ALDOB|VCP|LRP1|SDC4|ADCY1|THBS1|EGFR|PSMA7|PSMB6|C5|P2RY6|C6|PSMB5|PSMB3|C9|APOH|PSMB1|APOE|NHEJ1|CASP8AP2|TGFB1|HSPA5|AGT|SOD1|EFNA1|CCDC88A|TF|CCS|CDK5|APOC2|UBE2N|HRG
6909	0.00043927	0.0050348	11	53	910	14228	phagocytosis	CRP|FCN1|FCN2|LRP1|CD93|ELMO1|MYO7A|CD14|LBP|THBS1|MBL2
7044	0.00044866	0.0051282	8	30	910	14228	cell-substrate junction assembly	LAMA5|LAMB2|ITGB3|ACTN1|KRT14|HP|LAMC1|TLN1
42311	0.0004521	0.0051535	6	17	910	14228	vasodilation	GPX1|ITGA1|APOE|SOD2|KNG1|SOD1
32990	0.00046554	0.0052922	30	245	910	14228	cell part morphogenesis	SPON2|LAMA5|APP|SPTBN4|NRP2|TAZ|CLU|EGFR|GLI3|EFNB1|ALCAM|PTPRZ1|TNN|NRCAM|APOE|BBS7|LAMB2|ITGA1|RAB3IP|RTN4RL2|L1CAM|BMP7|EXT1|CDK5|ALMS1|S100A6|B3GNT2|PAM|PVRL1|PAFAH1B1
51131	0.00049772	0.005567	4	7	910	14228	chaperone-mediated protein complex assembly	APCS|HSP90AA1|HSPA4|CCT6B
43206	0.00049772	0.005567	4	7	910	14228	fibril organization	FKBP1A|CST3|COL3A1|COL5A1
51818	0.00049772	0.005567	4	7	910	14228	disruption of cells of other organism involved in symbiotic interaction	C9|ALB|CAMP|MBL2
51883	0.00049772	0.005567	4	7	910	14228	killing of cells in other organism involved in symbiotic interaction	C9|ALB|CAMP|MBL2
32372	0.00049772	0.005567	4	7	910	14228	negative regulation of sterol transport	APOC2|APOC1|APOA2|APOC3
32375	0.00049772	0.005567	4	7	910	14228	negative regulation of cholesterol transport	APOC2|APOC1|APOA2|APOC3
50865	0.00050372	0.005619	25	191	910	14228	regulation of cell activation	THBS1|SART1|EFNB1|PNP|CNR2|PDPN|CLPTM1|APOE|LBP|SNCA|VCAM1|TGFB1|HGF|SFTPD|SPINK5|MIF|PDCD1LG2|F2|TICAM1|SOD1|SELP|VNN1|FAP|SCGB1A1|IL6ST
34599	0.00052027	0.0057747	11	54	910	14228	cellular response to oxidative stress	TF|GPX1|GPX3|PRDX1|CAT|PRX|SOD2|MPO|PRDX6|SOD1|SNCA
6457	0.00052044	0.0057747	23	170	910	14228	protein folding	APCS|CCT2|HSP90AA1|APOA2|DNAJB13|TBCA|DNAJC16|HSP90B1|CCT6B|FKBP1A|LMAN1|ERP44|ERAF|TCP1|SACS|QSOX1|CALR|CCT7|PPIB|CRYAB|PPIA|PFDN5|PPIC
48646	0.00053672	0.0059396	41	375	910	14228	anatomical structure formation involved in morphogenesis	LAMA5|GPI|COL18A1|ENPEP|FLT1|B4GALT1|PLXND1|ITGB3|NOTCH4|HP|THBS1|GLI3|TTN|CDH1|ANPEP|CFL1|KDR|CEP290|SKIL|SPEN|GPX1|MMP2|HSPG2|BMP7|FKBP1A|EFNA1|EXT2|ACTA1|RBP4|PTPRB|CEACAM1|CDK5|MYH9|CDH13|CSPG4|ANG|PFN1|CD44|PAFAH1B1|ENG|FGFR1
16525	0.00057119	0.0062546	8	31	910	14228	negative regulation of angiogenesis	C7|APOH|SERPINF1|SPINK5|SERPINE1|THBS1|THBS4|PF4
42246	0.00057119	0.0062546	8	31	910	14228	tissue regeneration	IGFBP1|GSN|GPX1|SERPINE1|SERPINA10|PLG|IGF1|ENO3
2687	0.00057119	0.0062546	8	31	910	14228	positive regulation of leukocyte migration	SELP|C7|HGF|SERPINE1|MIA3|THBS1|THBS4|ICAM1
6081	0.00057119	0.0062546	8	31	910	14228	cellular aldehyde metabolic process	ADH4|RBP4|TPI1|GLO1|ALDH1A1|AKR1A1|TALDO1|AGT
46503	0.000574	0.0062689	5	12	910	14228	glycerolipid catabolic process	CPS1|PLA2G4C|APOA2|APOC3|APOB
61138	0.00057809	0.0062807	16	100	910	14228	morphogenesis of a branching epithelium	SPEN|LAMA5|MED1|TGFB1|CSF1|PLXND1|NOTCH4|CTSZ|IGF1|BMP7|GLI3|AGT|DAG1|CD44|ENG|FGFR1
16125	0.00057809	0.0062807	16	100	910	14228	sterol metabolic process	PON1|APOA2|PCSK9|APOA1|APOC3|LCAT|ACAT2|FAP|CAT|APOC1|APOF|ANGPTL3|APOE|APOB|APOL1|APOL3
70887	0.00059589	0.0064573	43	401	910	14228	cellular response to chemical stimulus	VCP|SERPINE1|HP|PCSK9|ADCY1|MPO|HSP90B1|UBE2L3|GHR|LGALS1|CDH1|C9|PRDX1|PRX|S100A12|LBP|CAMP|SNCA|IGFBP1|GPX1|TGFB1|GOT1|HSPA5|GPX3|EIF2AK1|HGF|ITGA1|SFTPD|IGFBP2|EIF2AK4|MIF|SOD2|PRDX6|SOD1|TF|CAT|SAA1|SAA2|CDH13|ALDOB|S100A9|ENG|PF4
48520	0.00064484	0.0069696	10	47	910	14228	positive regulation of behavior	CREB3|TF|TGFB1|C7|HGF|SERPINE1|KDR|CDH13|THBS1|THBS4
1763	0.00066513	0.0071704	18	121	910	14228	morphogenesis of a branching structure	SPEN|LAMA5|MED1|TGFB1|B4GALT1|CSF1|PLXND1|NOTCH4|CTSZ|IGF1|BMP7|GLI3|AGT|KDR|DAG1|CD44|ENG|FGFR1
31325	0.0006713	0.0072182	87	967	910	14228	positive regulation of cellular metabolic process	KDM5A|APP|CSF1|POP1|ITGB3|HP|PCSK9|HBB|UBE3A|TAZ|GLI3|ICAM1|AKAP12|GHR|RPS4X|PSMD9|PPP2R4|CDH1|FBXO5|RAP80|CAMP|SKP1|EIF5A|MED1|HSP90AA1|ANAPC7|HGF|ADIPOQ|APOA2|NME2|APOA1|MIF|F2|BAZ1B|TICAM1|PSMA6|CREB3|PSMA3|PSMA4|RFX6|PSMA1|PSMA2|IRF1|NARG1L|ANG|HPRT1|CRYAA|IL6ST|CD44|ENG|VCP|NOTCH4|EIF5A2|THBS1|EGFR|PSMA7|THBS4|PSMB6|HPX|VTN|C6|PSMB5|PSMB3|MYO6|PSMB1|APOE|SNCA|SPEN|TGFB1|HSPA5|GTF2H1|IGF1|SOD…
9725	0.00070959	0.0075908	46	441	910	14228	response to hormone stimulus	SERPINE1|HP|PCSK9|LCAT|ADCY1|BRCA2|SERPINA7|THBS1|UBE2L3|CPN1|GHR|MB|CA2|SPP1|DAG1|LTA4H|A2M|CAP1|IGFBP1|ABCA2|BCHE|TGFB1|GOT1|SORT1|HBG1|GPX3|SERPINF1|HGF|ADIPOQ|IGFBP2|APOA2|GGH|BMP7|AGT|ACTA1|RBP4|FABP3|TF|GCLC|FABP4|CPS1|LOX|ANGPTL3|ANG|ALDOB|CRYAB
44265	0.00070959	0.0075908	46	441	910	14228	cellular macromolecule catabolic process	VCP|RNH1|USP38|POP1|PCSK9|UBE3A|PLG|PSMA7|HSP90B1|UBE2L3|SMG6|PSMB6|PSMD9|C6|PSMB5|PSMB3|CDH1|PSMB1|APOE|APOB|SKP1|MED1|USP8|DFFA|ANAPC7|HSPA5|RNASE6|RAD23A|GTF2H1|UBE2G2|RNASE2|UCHL3|SOD1|PSMA6|BACE2|PSMA3|PSMA4|PSMA1|ERCC3|PSMA2|UBE2V2|UBE2N|MYH9|RBCK1|DNASE1L3|PCYOX1
9892	0.00071772	0.0076565	79	863	910	14228	negative regulation of metabolic process	ZNF174|ITGB3|SERPINE1|PCSK9|ENO1|BRCA2|TAZ|SMC3|GLI3|SERPINA5|PSMD9|PPP2R4|CDH1|BASP1|CFL1|XPO5|TRIM24|FBXO5|RAP80|TIMP1|ANAPC7|IGFBP5|HGF|ADIPOQ|SFTPD|APLP1|APOA2|ARID5B|MIF|F2|SMC1A|SND1|FOXP2|DKK3|PSMA6|BACE2|PSMA3|PSMA4|PSMA1|PSMA2|ANG|MASP1|CRYAA|CRYAB|PFDN5|ENG|LRP1|TXN|THBS1|PSMA7|PHF21A|PSMB6|CST3|C6|PSMB5|BTAF1|APOM|PSMB3|PSMB1|FLNA|APOE|A2M|SKIL|SNCA|SPEN|TGFB1|EIF2AK1|APOC3|EIF2AK4|BMP…
1906	0.0007194	0.0076565	8	32	910	14228	cell killing	C9|PRDX1|TUBB1|ALB|S100A12|APOL1|CAMP|MBL2
278	0.00073779	0.0078322	41	381	910	14228	mitotic cell cycle	APP|DCTN2|ZWILCH|DSCC1|CLTC|CAPG|SMC3|NCAPH|EGFR|PSMA7|KIF15|TTN|PSMB6|PSMD9|C6|PSMB5|SGOL1|PSMB3|CHL1|CDH1|PSMB1|TUBB1|NEK1|KNTC1|FBXO5|SKP1|ANAPC7|NEK4|HGF|HAUS3|SMC1A|PSMA6|POLA1|PSMA3|PSMA4|PSMA1|PSMA2|CDK3|KIF20B|RAN|PAFAH1B1
43542	0.00074217	0.0078587	7	25	910	14228	endothelial cell migration	GPX1|FAP|APOA1|MYH9|CDH13|S100P|PRSS3
48869	0.00077361	0.0081709	141	1712	910	14228	cellular developmental process	SPON2|APP|CSF1|POP1|TNC|BZW2|CLU|LGALS1|ALCAM|CDH1|TNN|BASP1|ANPEP|CFL1|TUBB1|KDR|NRCAM|FBXO5|RAG1|MED1|SERPINF1|KRT2|HGF|ADIPOQ|SPINK5|DAPK3|MIF|MYO7A|SFRP4|CACNB2|TIAM1|RBP4|OLFM3|CACNB4|RFX6|PSME4|S100A6|S100A4|DSC1|SPTBN4|NOTCH4|ACAT2|EFNB1|MYO6|LTA4H|APOE|SKIL|NHEJ1|VCAM1|TGFB1|CADM1|GPR98|RAB3IP|IGF1|L1CAM|BMP7|EXT1|EFNA1|EXT2|CCDC88A|BMP1|CDK5|PLXNB2|CSPG4|CALR|HRG|SHBG|PAM|SIM2|FGFR1|ITGB…
2685	0.0007774	0.0081902	9	40	910	14228	regulation of leukocyte migration	SELP|C5|C7|HGF|SERPINE1|MIA3|THBS1|THBS4|ICAM1
44242	0.00082673	0.008688	14	84	910	14228	cellular lipid catabolic process	HEXB|ADIPOQ|PLA2G4C|APOA2|APOC3|PRDX6|CPS1|GM2A|FAP|PRX|ANGPTL3|LBP|APOB|SLC27A2
7229	0.00084147	0.0087985	11	57	910	14228	integrin-mediated signaling pathway	ITGB1|LAMA5|COL3A1|CEACAM1|ADAMTS13|ITGA4|ITGB3|ITGA1|ITGA2B|ANGPTL3|MYH9
32102	0.00084147	0.0087985	11	57	910	14228	negative regulation of response to external stimulus	C5|GPX1|CNR2|SERPINC1|SERPINF1|ADIPOQ|SERPINE1|SPP1|SAA1|SAA2|APOE
23051	0.00085172	0.0088834	72	776	910	14228	regulation of signaling process	ITSN2|APP|ECM1|CSF1|TRAF3IP2|POP1|SERPINE1|HP|PCSK9|TNFAIP3|UBE3A|KNDC1|NENF|PRL|PTPRF|AKAP12|GHR|LGALS1|TIMP2|DAG1|YWHAG|GPX1|HGF|ADIPOQ|ITGA1|MIF|TICAM1|ZDHHC17|TBC1D1|TIAM1|TBC1D2|CAT|CDH13|S100A4|RBCK1|IL6ST|CD44|PAFAH1B1|THBS1|EGFR|TTN|HPX|C5|TSPAN6|PRDX1|RGS21|FLNA|S100A12|NCAM1|APOE|TBC1D12|APOL3|SNCA|TGFB1|GOT1|F10|AMBP|IQSEC3|DAB2IP|IGF1|L1CAM|BMP7|AGT|SOD1|FKBP1A|EFNA1|TF|UBE2N|RGS10|RG…
6631	0.00085526	0.0088981	26	209	910	14228	fatty acid metabolic process	ACACA|GHR|ADH4|ALOX5|PDPN|LTA4H|LBP|PTGDS|SNCA|GGT5|TPI1|PNPLA8|HBG1|ADIPOQ|PLA2G4C|MIF|ACSL3|FABP3|FABP4|FAP|FASN|ANGPTL3|SLC27A6|FAR1|SLC27A2|LPIN2
45454	0.00086756	0.0090036	12	66	910	14228	cell redox homeostasis	PDIA3|ERP44|GCLC|GPX1|PRDX1|GSR|PRX|QSOX1|TXN|PRDX6|DNAJC16|ERP70
8088	0.00088384	0.0091499	5	13	910	14228	axon cargo transport	APP|NEFM|KIF1B|KIF1A|PAFAH1B1
31640	0.00088751	0.0091651	6	19	910	14228	killing of cells of another organism	C9|ALB|S100A12|APOL1|CAMP|MBL2
50728	0.00089707	0.0091955	8	33	910	14228	negative regulation of inflammatory response	GPX1|CNR2|SERPINC1|SERPINF1|ADIPOQ|SAA1|SAA2|APOE
35303	0.00089707	0.0091955	8	33	910	14228	regulation of dephosphorylation	FKBP1A|RCN1|TGFB1|PPP2R4|HP|DSC1|HSP90B1|SMG6
44259	0.00089707	0.0091955	8	33	910	14228	multicellular organismal macromolecule metabolic process	COL3A1|MMP13|COL5A1|MMP2|XB|PEPD|MMP9|ACACA
5976	0.00090256	0.0092292	17	114	910	14228	polysaccharide metabolic process	ITIH4|PGLYRP2|ITIH2|HEXB|AGL|ITIH1|DCN|EXT1|CHIT1|NDST1|EXT2|EGFLAM|CPS1|B3GNT6|CHI3L1|IL6ST|CTBS
60326	0.00091123	0.009295	10	49	910	14228	cell chemotaxis	HGF|ITGA1|SFTPD|SAA1|SAA2|MIF|LBP|S100A9|ENG|PF4
48812	0.0009249	0.0094114	25	199	910	14228	neuron projection morphogenesis	SPON2|APP|SPTBN4|NRP2|CLU|EGFR|GLI3|EFNB1|ALCAM|PTPRZ1|TNN|NRCAM|APOE|LAMB2|ITGA1|RTN4RL2|L1CAM|BMP7|EXT1|CDK5|S100A6|B3GNT2|PAM|PVRL1|PAFAH1B1
50880	0.00094037	0.0095006	9	41	910	14228	regulation of blood vessel size	GCLC|GPX1|ITGA1|HBB|APOE|SOD2|AGT|KNG1|SOD1
35150	0.00094037	0.0095006	9	41	910	14228	regulation of tube size	GCLC|GPX1|ITGA1|HBB|APOE|SOD2|AGT|KNG1|SOD1
33627	0.00094505	0.0095006	4	8	910	14228	cell adhesion mediated by integrin	ITGB1|VTN|L1CAM|ICAM1
10875	0.00094505	0.0095006	4	8	910	14228	positive regulation of cholesterol efflux	LRP1|ADIPOQ|PON1|APOE
10984	0.00094505	0.0095006	4	8	910	14228	regulation of lipoprotein particle clearance	APOC2|APOC1|PCSK9|APOC3
10743	0.00096015	0.0096061	7	26	910	14228	regulation of macrophage derived foam cell differentiation	CRP|CSF1|ITGB3|ADIPOQ|APOB|AGT|PF4
30834	0.00096015	0.0096061	7	26	910	14228	regulation of actin filament depolymerization	SPTBN4|SPTBN5|GSN|CAPZB|CFL1|CAPG|SPTBN1
30154	0.00098554	0.0096609	137	1666	910	14228	cell differentiation	SPON2|APP|CSF1|POP1|TNC|BZW2|CLU|LGALS1|ALCAM|CDH1|TNN|BASP1|ANPEP|CFL1|TUBB1|KDR|NRCAM|FBXO5|RAG1|MED1|SERPINF1|KRT2|HGF|ADIPOQ|SPINK5|DAPK3|MIF|MYO7A|SFRP4|CACNB2|TIAM1|RBP4|OLFM3|CACNB4|RFX6|PSME4|S100A6|S100A4|DSC1|SPTBN4|NOTCH4|ACAT2|EFNB1|MYO6|LTA4H|APOE|SKIL|NHEJ1|VCAM1|TGFB1|CADM1|GPR98|IGF1|L1CAM|BMP7|EXT1|EFNA1|EXT2|CCDC88A|BMP1|CDK5|PLXNB2|CSPG4|CALR|HRG|SHBG|PAM|SIM2|FGFR1|ITGB1|COL18…
9313	0.00099341	0.0096609	3	4	910	14228	oligosaccharide catabolic process	GM2A|HEXB|CTBS
1955	0.00099341	0.0096609	3	4	910	14228	blood vessel maturation	CDH5|MMP2|CD44
35306	0.00099341	0.0096609	3	4	910	14228	positive regulation of dephosphorylation	TGFB1|PPP2R4|HP
35307	0.00099341	0.0096609	3	4	910	14228	positive regulation of protein amino acid dephosphorylation	TGFB1|PPP2R4|HP
10755	0.00099341	0.0096609	3	4	910	14228	regulation of plasminogen activation	F12|SERPINE1|THBS1
10915	0.00099341	0.0096609	3	4	910	14228	regulation of very-low-density lipoprotein particle clearance	APOC2|APOC1|APOC3
10916	0.00099341	0.0096609	3	4	910	14228	negative regulation of very-low-density lipoprotein particle clearance	APOC2|APOC1|APOC3
10954	0.00099341	0.0096609	3	4	910	14228	positive regulation of protein maturation by peptide bond cleavage	C6|F12|KLKB1
19852	0.00099341	0.0096609	3	4	910	14228	L-ascorbic acid metabolic process	GCLC|GSTO1|AKR1A1
31639	0.00099341	0.0096609	3	4	910	14228	plasminogen activation	APOH|F11|KLKB1
32488	0.00099341	0.0096609	3	4	910	14228	Cdc42 protein signal transduction	APOA1|APOC3|APOE
34637	0.00099654	0.0096687	12	67	910	14228	cellular carbohydrate biosynthetic process	EXT1|EXT2|GPI|RBP4|TPI1|B4GALT1|GOT1|B3GNT6|AGL|GPT|ALDOB|PGD
32386	0.0010914	0.010564	15	96	910	14228	regulation of intracellular transport	ABCA2|TGFB1|ZC3H3|TNC|TXN|TAZ|EGFR|GLI3|CDK5|CDH1|PRDX1|FLNA|LCP1|CRYAA|CRYAB
42439	0.0011082	0.010678	8	34	910	14228	ethanolamine and derivative metabolic process	BCHE|FABP3|PON1|APOA2|APOA1|LCAT|DBH|PAFAH1B1
45638	0.0011082	0.010678	8	34	910	14228	negative regulation of myeloid cell differentiation	SPEN|HIST1H4L|LRRC17|ADIPOQ|NME2|PF4|NME1|C1QC
9966	0.0011309	0.010871	71	771	910	14228	regulation of signal transduction	ITSN2|APP|ECM1|CSF1|TRAF3IP2|POP1|SERPINE1|HP|PCSK9|TNFAIP3|UBE3A|KNDC1|NENF|PRL|PTPRF|AKAP12|GHR|LGALS1|TIMP2|DAG1|YWHAG|GPX1|HGF|ADIPOQ|ITGA1|MIF|TICAM1|ZDHHC17|TBC1D1|TIAM1|TBC1D2|CAT|CDH13|S100A4|RBCK1|IL6ST|CD44|PAFAH1B1|THBS1|EGFR|TTN|HPX|C5|TSPAN6|PRDX1|RGS21|FLNA|S100A12|NCAM1|APOE|TBC1D12|APOL3|TGFB1|GOT1|F10|AMBP|IQSEC3|DAB2IP|IGF1|L1CAM|BMP7|AGT|SOD1|FKBP1A|EFNA1|TF|UBE2N|RGS10|RGS12|C…
48667	0.0011561	0.011088	24	191	910	14228	cell morphogenesis involved in neuron differentiation	SPON2|APP|SPTBN4|NRP2|LAMB2|RTN4RL2|MYO7A|L1CAM|BMP7|GLI3|SOD1|EXT1|EFNB1|ALCAM|PTPRZ1|CDK5|TNN|S100A6|B3GNT2|NRCAM|APOE|PAM|PVRL1|PAFAH1B1
51050	0.0011901	0.011388	31	271	910	14228	positive regulation of transport	LRP1|POP1|SERPINE1|PON1|PCSK9|EGFR|GLI3|PSMD9|VTN|C5|CDH1|FLNA|APOE|MBL2|SNCA|TGFB1|CADM1|AHSG|HGF|ADIPOQ|SFTPD|MIF|F2|CREB3|RBP4|CDK5|FAP|SAA1|SAA2|ANG|CALR
50764	0.0011999	0.011429	6	20	910	14228	regulation of phagocytosis	TGFB1|AHSG|ADIPOQ|SFTPD|CALR|MBL2
10043	0.0011999	0.011429	6	20	910	14228	response to zinc ion	CA2|SLC30A5|KRT14|GGH|LTA4H|ALDOB
45595	0.0012116	0.011503	54	553	910	14228	regulation of cell differentiation	B4GALT1|CSF1|ITGB3|TAZ|CLU|PTPRF|GLI3|GHR|SART1|LGALS1|PNP|CA2|TIMP2|NEFM|NRCAM|YWHAG|EIF5A|SERPINF1|HGF|ADIPOQ|SPINK5|NME2|F2|NME1|TIAM1|IL6ST|CRP|NOTCH4|LRRC17|CLPTM1|SPP1|APOE|APOB|DISC1|SKIL|SPEN|TGFB1|HIST1H4L|GPR98|IGF1|SOD2|BMP7|AGT|SOD1|EFNA1|CCDC88A|VNN1|ALMS1|PLXNB2|CALR|HRG|PF4|C1QC|FGFR1
42692	0.0012132	0.011503	17	117	910	14228	muscle cell differentiation	APP|GPX1|SORT1|TNC|PLG|IGF1|AGT|TTN|ACTA1|CACNB2|RCN1|LGALS1|CACNB4|FAP|MYH9|HRG|DSC1
46427	0.0012255	0.011594	7	27	910	14228	positive regulation of JAK-STAT cascade	GHR|HPX|HGF|IGF1|CLC|PRL|IL6ST
1817	0.0012319	0.011627	25	203	910	14228	regulation of cytokine production	POP1|SERPINE1|THBS1|C5|CD14|LBP|SRGN|TGFB1|CADM1|HGF|ADIPOQ|SFTPD|APOA2|APOA1|MIF|TICAM1|AGT|SOD1|FAP|IRF1|SCGB1A1|SAA1|SAA2|IL6ST|PF4
35466	0.0012368	0.011648	88	1000	910	14228	regulation of signaling pathway	ITSN2|APP|ECM1|FLT1|CSF1|TRAF3IP2|POP1|ITGB3|LECT2|HP|TNFAIP3|UBE3A|KNDC1|NENF|PARK7|PRL|TAZ|PTPRF|GLI3|AKAP12|GHR|LGALS1|TRIM24|TIMP2|DAG1|LBP|GPX1|IGFBP5|AHSG|HGF|ADIPOQ|ITGA1|MST1|IGFBP2|MIF|TICAM1|ZDHHC17|DKK3|TBC1D1|TIAM1|TBC1D2|CAT|CDH13|S100A4|RBCK1|IL6ST|PFDN5|CD44|PAFAH1B1|ENG|LRP1|THBS1|EGFR|TTN|HPX|VTN|C5|TSPAN6|PRDX1|FLNA|S100A12|NCAM1|APOE|TBC1D12|DISC1|SKIL|APOL3|SNCA|TGFB1|GOT1|F10…
33036	0.0012642	0.011879	96	1109	910	14228	macromolecule localization	AHCTF1|NUP188|TRAF3IP2|HEXB|ZC3H3|CLTC|GDI2|MIA3|DBI|CLU|SMG6|AKAP12|SGOL1|PNP|GM2A|TMSB4X|XPO5|DAG1|KPNA7|LBP|CEP290|YWHAG|EIF5A|PDIA3|SRGN|VPS13C|VPS13D|VPS13A|APOA2|VPS13B|APOA1|THOC2|F2|YWHAZ|ZDHHC17|ERP70|SLC9A2|RBP4|ANGPTL3|SLC27A6|MYH9|SEC22B|TLN1|VCL|CFD|CUTA|SPTBN4|VCP|EIF5A2|LCAT|SNX32|SNX31|EGFR|ACAT2|FYB|HSP90B1|SELENBP1|LMAN1|APOL4|APOM|RAB40B|C7|C9|APOH|LMAN2|MYO6|TPR|APOF|FLNA|APOE…
51174	0.001299	0.012151	53	542	910	14228	regulation of phosphorus metabolic process	APP|FLT1|CSF1|POP1|ITGB3|HP|TAZ|SMG6|GHR|PPP2R4|CAMP|YWHAG|HGF|ADIPOQ|ITGA1|APOA1|MIF|F2|RCN1|ANG|CRYAA|IL6ST|DSC1|CD44|ENG|LRP1|SDC4|ADCY1|THBS1|EGFR|THBS4|HSP90B1|TTN|HPX|VTN|C5|APOE|TGFB1|HSPA5|EIF2AK1|GTF2H1|IGF1|BMP7|AGT|SOD1|FKBP1A|EFNA1|CCDC88A|FABP4|CDK5|FAP|CLC|HRG
19220	0.001299	0.012151	53	542	910	14228	regulation of phosphate metabolic process	APP|FLT1|CSF1|POP1|ITGB3|HP|TAZ|SMG6|GHR|PPP2R4|CAMP|YWHAG|HGF|ADIPOQ|ITGA1|APOA1|MIF|F2|RCN1|ANG|CRYAA|IL6ST|DSC1|CD44|ENG|LRP1|SDC4|ADCY1|THBS1|EGFR|THBS4|HSP90B1|TTN|HPX|VTN|C5|APOE|TGFB1|HSPA5|EIF2AK1|GTF2H1|IGF1|BMP7|AGT|SOD1|FKBP1A|EFNA1|CCDC88A|FABP4|CDK5|FAP|CLC|HRG
50795	0.0013025	0.012157	12	69	910	14228	regulation of behavior	CREB3|C5|TF|TGFB1|C7|HGF|SERPINE1|KDR|CDH13|PTGDS|THBS1|THBS4
30182	0.0013271	0.012358	45	442	910	14228	neuron differentiation	SPON2|APP|SPTBN4|NRP2|NTN4|PCSK9|LAMC1|CLU|EGFR|GLI3|EFNB1|ALCAM|PTPRZ1|CDH1|TNN|MYO6|TUBB1|NRCAM|APOE|NCAM2|CEP290|LAMB2|GPR98|HGF|ITGA1|DAPK3|LAMB1|RTN4RL2|MYO7A|L1CAM|SOD2|BMP7|SOD1|EXT1|EFNA1|OLFM3|CDK5|ALMS1|S100A6|B3GNT2|PAM|PVRL1|CD44|PAFAH1B1|FGFR1
48732	0.0013363	0.012417	24	193	910	14228	gland development	LAMA5|MED1|TGFB1|B4GALT1|CSF1|PLXND1|NOTCH4|TNC|APOA1|UBE3A|IGF1|PRL|BRCA2|BMP7|EGFR|GLI3|DKK3|NME1|BCAM|CDH1|DAG1|HRG|CD44|FGFR1
10646	0.0013428	0.012449	99	1152	910	14228	regulation of cell communication	ITSN2|APP|CSF1|TRAF3IP2|POP1|SERPINE1|HP|UBE3A|KNDC1|PSMD9|LGALS1|TRIM24|DAG1|IGFBP5|HGF|ADIPOQ|MIF|TICAM1|DKK3|TIAM1|RBP4|RFX6|S100A4|RBCK1|IL6ST|CPLX3|HPX|VTN|C5|TSPAN6|PRDX1|MYO6|S100A12|APOE|TBC1D12|SKIL|TGFB1|GOT1|AMBP|HSPA5|IQSEC3|IGF1|L1CAM|BMP7|EFNA1|TF|CDK5|UBE2N|CALR|FGFR1|ECM1|FLT1|ITGB3|LECT2|PCSK9|TNFAIP3|NENF|PRL|TAZ|PTPRF|GLI3|AKAP12|GHR|TIMP2|LBP|YWHAG|GPX1|AHSG|ITGA1|MST1|ZDHHC17…
31348	0.0013493	0.012482	9	43	910	14228	negative regulation of defense response	GPX1|CNR2|SERPINC1|SERPINF1|ADIPOQ|SAA1|SAA2|APOE|A2M
22612	0.0014143	0.013054	13	79	910	14228	gland morphogenesis	LAMA5|MED1|TGFB1|CSF1|PLXND1|TNC|IGF1|BMP7|EGFR|CDH1|DAG1|CD44|FGFR1
55080	0.0014428	0.013288	32	286	910	14228	cation homeostasis	CCL14|APP|HEXB|IREB2|HP|CPN2|KNG1|HSP90B1|HPX|C7|KDR|TRIM24|APOE|CD55|TGFB1|SLC30A5|GSS|F2|SOD2|CP|AGT|SOD1|SLC9A2|TF|CACNB4|LCN2|SAA1|SAA2|CALR|IL6ST|FTL|LTF
50801	0.0014636	0.01345	42	407	910	14228	ion homeostasis	CCL14|APP|HEXB|IREB2|HP|PARK7|CPN2|KNG1|HSP90B1|HPX|C7|CNR2|PRX|KDR|TRIM24|APOE|CD55|SNCA|SLC34A3|TGFB1|HBG1|SLC30A5|GSS|ADIPOQ|F2|SOD2|CP|AGT|SOD1|SLC9A2|TF|CACNB4|CPS1|CDK5|LCN2|SAA1|SAA2|CALR|IL6ST|FTL|OTC|LTF
51094	0.0015435	0.014104	37	347	910	14228	positive regulation of developmental process	ECM1|B4GALT1|CSF1|SERPINE1|TAZ|CLU|THBS1|PTPRF|GLI3|GHR|SART1|C5|C6|PNP|CA2|NRCAM|APOB|DISC1|SKIL|CAMP|EIF5A|TGFB1|SERPINF1|HGF|NME2|BMP7|AGT|TIAM1|TF|BMP1|VNN1|ANGPTL3|PLXNB2|HRG|IL6ST|PF4|FGFR1
42168	0.001545	0.014104	7	28	910	14228	heme metabolic process	ALAD|HPX|AMBP|COX15|IREB2|BLVRB|DBI
50777	0.001545	0.014104	7	28	910	14228	negative regulation of immune response	COL3A1|GPX1|TGFB1|AMBP|SPINK5|MASP1|A2M
45103	0.0015899	0.014337	6	21	910	14228	intermediate filament-based process	KRT14|NEFM|VIM|KRT20|SOD1|KRT9
48259	0.0015899	0.014337	6	21	910	14228	regulation of receptor-mediated endocytosis	VTN|APOC2|SERPINE1|APOC1|PCSK9|APOC3
55066	0.0015944	0.014337	28	241	910	14228	di-, tri-valent inorganic cation homeostasis	CCL14|APP|HEXB|IREB2|HP|KNG1|HSP90B1|HPX|KDR|TRIM24|APOE|CD55|TGFB1|SLC30A5|GSS|F2|SOD2|CP|SOD1|TF|CACNB4|LCN2|SAA1|SAA2|CALR|IL6ST|FTL|LTF
30595	0.0016017	0.014337	9	44	910	14228	leukocyte chemotaxis	HGF|ITGA1|SFTPD|SAA1|SAA2|MIF|LBP|S100A9|PF4
34370	0.0016152	0.014337	4	9	910	14228	triglyceride-rich lipoprotein particle remodeling	APOC2|APOA2|LCAT|APOE
34374	0.0016152	0.014337	4	9	910	14228	low-density lipoprotein particle remodeling	APOA2|APOB|MPO|AGT
10874	0.0016152	0.014337	4	9	910	14228	regulation of cholesterol efflux	LRP1|ADIPOQ|PON1|APOE
44269	0.0016152	0.014337	4	9	910	14228	glycerol ether catabolic process	CPS1|APOA2|APOC3|APOB
46461	0.0016152	0.014337	4	9	910	14228	neutral lipid catabolic process	CPS1|APOA2|APOC3|APOB
46464	0.0016152	0.014337	4	9	910	14228	acylglycerol catabolic process	CPS1|APOA2|APOC3|APOB
6098	0.0016152	0.014337	4	9	910	14228	pentose-phosphate shunt	TPI1|H6PD|TALDO1|PGD
32373	0.0016152	0.014337	4	9	910	14228	positive regulation of sterol transport	LRP1|ADIPOQ|PON1|APOE
32376	0.0016152	0.014337	4	9	910	14228	positive regulation of cholesterol transport	LRP1|ADIPOQ|PON1|APOE
46394	0.0016745	0.014801	21	163	910	14228	carboxylic acid biosynthetic process	GGT5|TPI1|GOT1|GSTO1|BHMT2|AKR1A1|MIF|ACSL3|PGD|ACACA|AGT|BHMT|BCAM|UGP2|MTHFD1|FASN|ALOX5|FAR1|LTA4H|PTGDS|OTC
16053	0.0016745	0.014801	21	163	910	14228	organic acid biosynthetic process	GGT5|TPI1|GOT1|GSTO1|BHMT2|AKR1A1|MIF|ACSL3|PGD|ACACA|AGT|BHMT|BCAM|UGP2|MTHFD1|FASN|ALOX5|FAR1|LTA4H|PTGDS|OTC
60348	0.0016948	0.014917	18	131	910	14228	bone development	ECM1|SPARC|TGFB1|SORT1|MMP2|AMBN|LRRC17|TAZ|BMP7|EGFR|EXT1|GHR|MINPP1|EXT2|BMP1|GPNMB|CDH11|SPP1
60537	0.0016948	0.014917	18	131	910	14228	muscle tissue development	APP|GPX1|IGFBP5|TNC|TAZ|DCN|TTN|FKBP1A|ACTA1|CACNB2|RBP4|RCN1|CACNB4|CDK5|HRG|DSC1|SKIL|ENG
44272	0.001715	0.015063	10	53	910	14228	sulfur compound biosynthetic process	EXT1|GGT5|NDST1|EXT2|BHMT|GCLC|MTHFD1|BHMT2|IGF1|HAGH
2683	0.0018379	0.016109	14	91	910	14228	negative regulation of immune system process	GPX1|TGFB1|AMBP|SFTPD|SPINK5|PDCD1LG2|THBS1|C5|COL3A1|CNR2|FAP|SCGB1A1|MASP1|A2M
1954	0.0018522	0.0162	5	15	910	14228	positive regulation of cell-matrix adhesion	SDC4|CSF1|KDR|CDH13|UTRN
51271	0.001904	0.016618	12	72	910	14228	negative regulation of cellular component movement	C5|TGFB1|IGFBP5|ACTN1|APOH|SERPINE1|HP|DAG1|MIA3|APOE|THBS1|VCL
50715	0.0019257	0.016773	7	29	910	14228	positive regulation of cytokine secretion	C5|CADM1|FAP|POP1|SAA1|SAA2|MIF
14706	0.0019311	0.016784	17	122	910	14228	striated muscle tissue development	APP|GPX1|IGFBP5|TNC|TAZ|DCN|TTN|FKBP1A|ACTA1|CACNB2|RBP4|RCN1|CACNB4|CDK5|HRG|DSC1|SKIL
10605	0.0019802	0.017168	72	801	910	14228	negative regulation of macromolecule metabolic process	ZNF174|ITGB3|SERPINE1|PCSK9|ENO1|BRCA2|TAZ|SMC3|GLI3|SERPINA5|PSMD9|PPP2R4|CDH1|BASP1|CFL1|XPO5|TRIM24|FBXO5|RAP80|TIMP1|ANAPC7|IGFBP5|HGF|ADIPOQ|SFTPD|ARID5B|MIF|F2|SMC1A|SND1|FOXP2|DKK3|PSMA6|BACE2|PSMA3|PSMA4|PSMA1|PSMA2|ANG|MASP1|CRYAA|CRYAB|PFDN5|ENG|LRP1|TXN|THBS1|PSMA7|PHF21A|PSMB6|CST3|C6|PSMB5|BTAF1|APOM|PSMB3|PSMB1|FLNA|A2M|SKIL|SNCA|SPEN|TGFB1|EIF2AK1|EIF2AK4|BMP7|GCLC|CDK5|SCGB1A1|CAL…
33013	0.0019876	0.017168	8	37	910	14228	tetrapyrrole metabolic process	ALAD|HPX|AMBP|COX15|EIF2AK1|IREB2|BLVRB|DBI
6778	0.0019876	0.017168	8	37	910	14228	porphyrin metabolic process	ALAD|HPX|AMBP|COX15|EIF2AK1|IREB2|BLVRB|DBI
51693	0.0020692	0.017836	6	22	910	14228	actin filament capping	SPTBN4|SPTBN5|GSN|CAPZB|CAPG|SPTBN1
7409	0.0020915	0.017991	22	177	910	14228	axonogenesis	SPON2|APP|SPTBN4|NRP2|LAMB2|RTN4RL2|L1CAM|BMP7|GLI3|EXT1|EFNB1|ALCAM|PTPRZ1|CDK5|TNN|S100A6|B3GNT2|NRCAM|APOE|PAM|PVRL1|PAFAH1B1
8285	0.0021326	0.018307	39	378	910	14228	negative regulation of cell proliferation	COL18A1|B4GALT1|HP|PLG|BRCA2|THBS1|PTPRF|FGFRL1|GLI3|CDH5|GPNMB|APOH|TRIM24|TIMP2|WDR6|APOE|IGFBP6|WARS|TGFB1|IGFBP5|EIF2AK1|SERPINF1|HGF|SFTPD|IGF1|PDCD1LG2|SOD2|BMP7|MYO16|AGT|NME1|RBP4|FABP3|AZGP1|FAP|SCGB1A1|CDH13|ANG|ENG
30705	0.0022196	0.019015	9	46	910	14228	cytoskeleton-dependent intracellular transport	APP|MYL1|MYO6|MYH9|NEFM|KIF1B|MYO7A|KIF1A|PAFAH1B1
32801	0.0023652	0.01989	3	5	910	14228	receptor catabolic process	TGFB1|CDK5|PCSK9
34308	0.0023652	0.01989	3	5	910	14228	monohydric alcohol metabolic process	ADH4|ADH1C|ADH1B
10739	0.0023652	0.01989	3	5	910	14228	positive regulation of protein kinase A signaling cascade	AKAP12|ADIPOQ|MIF
60055	0.0023652	0.01989	3	5	910	14228	angiogenesis involved in wound healing	GPX1|B4GALT1|ITGB3
30449	0.0023652	0.01989	3	5	910	14228	regulation of complement activation	C6|MASP1|A2M
6067	0.0023652	0.01989	3	5	910	14228	ethanol metabolic process	ADH4|ADH1C|ADH1B
6069	0.0023652	0.01989	3	5	910	14228	ethanol oxidation	ADH4|ADH1C|ADH1B
22614	0.0023652	0.01989	3	5	910	14228	membrane to membrane docking	VCAM1|MSN|ICAM1
7598	0.0023652	0.01989	3	5	910	14228	blood coagulation, extrinsic pathway	TF|F9|F10
32963	0.0023753	0.01989	7	30	910	14228	collagen metabolic process	COL3A1|MMP13|COL5A1|MMP2|XB|PEPD|MMP9
45807	0.0023789	0.01989	8	38	910	14228	positive regulation of endocytosis	VTN|AHSG|SFTPD|SERPINE1|PCSK9|CALR|MBL2|SNCA
46496	0.0023789	0.01989	8	38	910	14228	nicotinamide nucleotide metabolic process	LDHB|TPI1|PNP|H6PD|MDH1|TALDO1|ALDOB|PGD
7584	0.0024357	0.020324	21	168	910	14228	response to nutrient	BCHE|VCAM1|GSN|TGFB1|SERPINC1|SERPINF1|ADIPOQ|IGFBP2|ACSL3|BRCA2|BMP7|SERPINA7|ACAT2|IGF2R|RBP4|C7|ALOX5|SPP1|IL6ST|A2M|CD44
1819	0.0024745	0.020565	15	104	910	14228	positive regulation of cytokine production	TGFB1|POP1|HGF|SERPINE1|TICAM1|THBS1|AGT|SOD1|C5|SAA1|SAA2|CD14|LBP|IL6ST|PF4
51260	0.0024745	0.020565	15	104	910	14228	protein homooligomerization	VCP|VWF|GPX3|GSS|ADIPOQ|MIF|SOD2|ALAD|C1QTNF1|CDH1|C9|HPRT1|CRYAA|CRYAB|SKIL
45599	0.0025536	0.020912	5	16	910	14228	negative regulation of fat cell differentiation	TGFB1|HGF|ADIPOQ|TAZ|SOD2
45940	0.0025536	0.020912	5	16	910	14228	positive regulation of steroid metabolic process	APOC1|APOA2|APOA1|APOE|AGT
9650	0.0025563	0.020912	4	10	910	14228	UV protection	GPX1|ERCC3|CAT|SDF4
60693	0.0025563	0.020912	4	10	910	14228	regulation of branching involved in salivary gland morphogenesis	CDH1|HGF|NTN4|FGFR1
45109	0.0025563	0.020912	4	10	910	14228	intermediate filament organization	KRT14|NEFM|KRT20|KRT9
45649	0.0025563	0.020912	4	10	910	14228	regulation of macrophage differentiation	CSF1|ADIPOQ|PF4|C1QC
70306	0.0025563	0.020912	4	10	910	14228	lens fiber cell differentiation	TGFB1|CDH1|CRYAA|SKIL
6740	0.0025563	0.020912	4	10	910	14228	NADPH regeneration	TPI1|H6PD|TALDO1|PGD
42531	0.00265	0.021594	6	23	910	14228	positive regulation of tyrosine phosphorylation of STAT protein	GHR|HPX|HGF|IGF1|CLC|IL6ST
51897	0.00265	0.021594	6	23	910	14228	positive regulation of protein kinase B signaling cascade	TF|GPX1|TGFB1|F10|THBS1|EGFR
1503	0.0028733	0.023368	16	116	910	14228	ossification	ECM1|SPARC|TGFB1|SORT1|MMP2|AMBN|TAZ|BMP7|EGFR|EXT1|MINPP1|EXT2|BMP1|GPNMB|CDH11|SPP1
3013	0.0029677	0.024041	22	182	910	14228	circulatory system process	CHGA|GPX1|ADIPOQ|ITGA1|TNC|HBB|TAZ|SOD2|CPN2|AGT|KNG1|CPN1|SOD1|GCLC|RCN1|COL1A2|C7|MYL1|OLR1|APOE|DSC1|ENG
8015	0.0029677	0.024041	22	182	910	14228	blood circulation	CHGA|GPX1|ADIPOQ|ITGA1|TNC|HBB|TAZ|SOD2|CPN2|AGT|KNG1|CPN1|SOD1|GCLC|RCN1|COL1A2|C7|MYL1|OLR1|APOE|DSC1|ENG
30203	0.0030147	0.024374	10	57	910	14228	glycosaminoglycan metabolic process	EXT1|NDST1|ITIH4|EXT2|PGLYRP2|ITIH2|EGFLAM|HEXB|ITIH1|DCN
9100	0.0030975	0.024995	23	194	910	14228	glycoprotein metabolic process	GALNT7|ST6GAL1|B4GALT1|GPT|IGF1|POMGNT1|DCN|ASGR2|SULF2|EXT1|FKBP1A|NDST1|EXT2|ERP44|ADAMTS13|EGFLAM|B3GNT6|MAN2A1|LARGE|ST3GAL5|B3GNT2|AGA|IL17A
2009	0.0032038	0.025803	24	206	910	14228	morphogenesis of an epithelium	SPEN|LAMA5|MED1|TGFB1|CSF1|PLXND1|NOTCH4|CTSZ|HP|TNC|IGF1|BMP7|EGFR|GLI3|AGT|CA2|CFL1|DAG1|BBS7|PFN1|CD44|VCL|ENG|FGFR1
30336	0.0032731	0.026311	11	67	910	14228	negative regulation of cell migration	C5|TGFB1|IGFBP5|APOH|SERPINE1|HP|DAG1|MIA3|APOE|THBS1|VCL
45833	0.0033408	0.026734	8	40	910	14228	negative regulation of lipid metabolic process	APOM|APOC2|APOC1|APOA2|APOC3|APOE|SOD1|DKK3
31333	0.0033408	0.026734	8	40	910	14228	negative regulation of protein complex assembly	SPTBN4|SPTBN5|GSN|CAPZB|TMSB4X|CAPG|CLU|SPTBN1
30835	0.0033449	0.026734	6	24	910	14228	negative regulation of actin filament depolymerization	SPTBN4|SPTBN5|GSN|CAPZB|CAPG|SPTBN1
55114	0.0033552	0.026765	59	645	910	14228	oxidation reduction	KDM5A|DBH|TAZ|MPO|PRX|QSOX1|LBP|GPX1|GPX3|AKR1A1|P3H2|TET1|PGD|F5|F8|MTHFD1|LOX|CAT|TET3|ALDH1A1|BLVRB|FAR1|HPD|GAPDH|FTL|PCYOX1|GCDH|H6PD|ADH1C|COX15|ADH1B|TXN|CYP2C18|CPN2|CPN1|ADH4|LDHB|LDHA|C9|PRDX1|ALOX5|CD14|CBR3|SNCA|AOC3|CYB5A|KDM4A|PDHA2|MDH1|GSR|SOD2|CP|SOD3|PRDX6|SOD1|CCS|CPS1|FASN|PAM
51146	0.0034246	0.027045	13	87	910	14228	striated muscle cell differentiation	APP|GPX1|SORT1|TNC|IGF1|TTN|ACTA1|CACNB2|RCN1|CACNB4|MYH9|HRG|DSC1
43666	0.0034292	0.027045	5	17	910	14228	regulation of phosphoprotein phosphatase activity	FKBP1A|RCN1|PPP2R4|DSC1|HSP90B1
60445	0.0034292	0.027045	5	17	910	14228	branching involved in salivary gland morphogenesis	LAMA5|PLXND1|DAG1|BMP7|FGFR1
45806	0.0034292	0.027045	5	17	910	14228	negative regulation of endocytosis	TGFB1|APOC2|ADIPOQ|APOC1|APOC3
71222	0.0034292	0.027045	5	17	910	14228	cellular response to lipopolysaccharide	SERPINE1|CD14|LBP|TICAM1|CAMP
46688	0.0034292	0.027045	5	17	910	14228	response to copper ion	GSS|LCAT|ALDOB|SOD3|SOD1
71216	0.0034865	0.027393	9	49	910	14228	cellular response to biotic stimulus	VCP|HSPA5|EIF2AK1|SERPINE1|EIF2AK4|CD14|LBP|TICAM1|CAMP
55002	0.0034865	0.027393	9	49	910	14228	striated muscle cell development	ACTA1|CACNB2|APP|RCN1|CACNB4|GPX1|TNC|DSC1|TTN
1938	0.0035124	0.027442	7	32	910	14228	positive regulation of endothelial cell proliferation	TF|ECM1|ITGB3|KDR|CDH13|ANG|THBS4
51896	0.0035124	0.027442	7	32	910	14228	regulation of protein kinase B signaling cascade	TF|GPX1|TGFB1|F10|DAG1|THBS1|EGFR
30837	0.0035124	0.027442	7	32	910	14228	negative regulation of actin filament polymerization	SPTBN4|SPTBN5|GSN|CAPZB|TMSB4X|CAPG|SPTBN1
9887	0.0036105	0.028155	58	634	910	14228	organ morphogenesis	COL18A1|CSF1|PLXND1|CTSZ|HP|TNC|FGFRL1|GLI3|GHR|COMP|NDST1|CA2|CFL1|DAG1|BBS7|CEP290|MED1|MMP2|HGF|APLP1|APOA2|ARID5B|MYO7A|BAZ1B|DCN|RBP4|OLFM3|CRYAA|PFN1|CD44|VCL|PAFAH1B1|ENG|LAMA5|NOTCH4|EGFR|TTN|APOH|MYO6|SPEN|TGFB1|AMBN|LAMB1|IGF1|BMP7|IGF2R|AGT|SOD1|FKBP1A|EFNA1|EXT2|COL1A2|BMP1|COL5A1|AXL|ALMS1|PVRL1|FGFR1
22402	0.0036623	0.028506	54	582	910	14228	cell cycle process	APP|ZWILCH|DSCC1|CLTC|BRCA2|SMC3|KIF15|PSMD9|SART1|SGOL1|CHL1|CDH1|TUBB1|NEK1|WDR6|KNTC1|FBXO5|SKP1|ANAPC7|HGF|HAUS3|SMC1A|SMC1B|PSMA6|PSMA3|PSMA4|PSMA1|PSMA2|MYH9|CRYAA|KIF20B|PAFAH1B1|DCTN2|CAPG|THBS1|NCAPH|EGFR|PSMA7|TTN|RAD54B|PSMB6|C6|PSMB5|PSMB3|PSMB1|SKIL|TGFB1|NEK4|GSS|FAH|POLA1|CDK3|CALR|RAN
32970	0.0037127	0.028844	14	98	910	14228	regulation of actin filament-based process	SPTBN4|SPTBN5|GSN|SDC4|HP|TNC|CAPG|ARPC5|CNN2|CCDC88A|CAPZB|TMSB4X|CFL1|SPTBN1
42517	0.0038152	0.029193	4	11	910	14228	positive regulation of tyrosine phosphorylation of Stat3 protein	GHR|HGF|CLC|IL6ST
43030	0.0038152	0.029193	4	11	910	14228	regulation of macrophage activation	MIF|LBP|THBS1|SNCA
10543	0.0038152	0.029193	4	11	910	14228	regulation of platelet activation	SELP|PDPN|APOE|F2
6378	0.0038152	0.029193	4	11	910	14228	mRNA polyadenylation	APP|ZC3H3|CPSF3|APLP1
40014	0.0039086	0.029193	10	59	910	14228	regulation of multicellular organism growth	GHR|ATRN|APP|SPTBN4|CSF1|APOE|IGF1|PRL|AGT|SOD1
9628	0.00392	0.029193	40	404	910	14228	response to abiotic stimulus	APP|COL18A1|CPB2|DBH|BRCA2|THBS1|EGFR|RAD54B|CNN2|C7|CA2|SDF4|RAP80|CD14|NHEJ1|MED1|SLC14A2|VCAM1|GPX1|TGFB1|HSPA1L|HSPA4|GPR98|IGFBP2|SOD2|SMC1A|AGT|DCN|SOD1|ACTA1|RBP4|COL3A1|TF|GCLC|ERCC3|CDK5|CAT|KRT14|CRYAA|CRYAB
50821	0.0039228	0.029193	8	41	910	14228	protein stabilization	ERAF|FLNA|APOA1|CALR|DSC1|DSC2|CPN2|DSC3
19362	0.0039228	0.029193	8	41	910	14228	pyridine nucleotide metabolic process	LDHB|TPI1|PNP|H6PD|MDH1|TALDO1|ALDOB|PGD
7266	0.0039228	0.029193	8	41	910	14228	Rho protein signal transduction	COL1A2|CFL1|ARHGDIB|ARHGAP1|APOA1|APOC3|CDH13|APOE
43065	0.0039244	0.029193	43	442	910	14228	positive regulation of apoptosis	APP|COL18A1|B4GALT1|PDCD6|HP|PCSK9|PLG|BRCA2|THBS1|PTPRF|KNG1|SART1|C6|PPP2R4|C9|PRDX1|TUBB1|APOE|EIF5A|PDIA3|CASP8AP2|MED1|SAP30BP|DFFA|GPX1|TGFB1|SORT1|HGF|ADIPOQ|ITGA1|MST1|DAPK3|TICAM1|BMP7|MMP9|IGF2R|AGT|SOD1|TIAM1|ERCC3|CDK5|CD44|ITM2B
90066	0.003928	0.029193	33	317	910	14228	regulation of anatomical structure size	APP|SPTBN4|SPTBN5|HBB|CAPG|SLC3A2|ENO1|KNG1|CAPZB|TNN|TMSB4X|CFL1|SPP1|NEFM|APOE|SPTBN1|IGFBP1|GSN|GPX1|TGFB1|LAMB2|ITGA1|ARPC5|SOD2|AGT|SOD1|ACTA1|GCLC|HRG|CRYAA|SHBG|CRYAB|FGFR1
8212	0.0040865	0.029193	2	2	910	14228	mineralocorticoid metabolic process	CPN2|CPN1
1300	0.0040865	0.029193	2	2	910	14228	chronological cell aging	SERPINE1|ENG
34619	0.0040865	0.029193	2	2	910	14228	cellular chaperone-mediated protein complex assembly	HSP90AA1|HSPA4
1897	0.0040865	0.029193	2	2	910	14228	cytolysis by symbiont of host cells	C9|ALB
1907	0.0040865	0.029193	2	2	910	14228	killing by symbiont of host cells	C9|ALB
2254	0.0040865	0.029193	2	2	910	14228	kinin cascade	F12|KLKB1
2353	0.0040865	0.029193	2	2	910	14228	plasma kallikrein-kinin cascade	F12|KLKB1
2542	0.0040865	0.029193	2	2	910	14228	Factor XII activation	F12|KLKB1
51715	0.0040865	0.029193	2	2	910	14228	cytolysis of cells of another organism	C9|ALB
10762	0.0040865	0.029193	2	2	910	14228	regulation of fibroblast migration	TGFB1|THBS1
10763	0.0040865	0.029193	2	2	910	14228	positive regulation of fibroblast migration	TGFB1|THBS1
51801	0.0040865	0.029193	2	2	910	14228	cytolysis of cells in other organism involved in symbiotic interaction	C9|ALB
19042	0.0040865	0.029193	2	2	910	14228	latent virus infection	CREB3|HCFC1
19046	0.0040865	0.029193	2	2	910	14228	reactivation of latent virus	CREB3|HCFC1
2691	0.0040865	0.029193	2	2	910	14228	regulation of cellular extravasation	SELP|ICAM1
52025	0.0040865	0.029193	2	2	910	14228	modification by symbiont of host cell membrane	C9|ALB
52043	0.0040865	0.029193	2	2	910	14228	modification by symbiont of host cellular component	C9|ALB
52111	0.0040865	0.029193	2	2	910	14228	modification by symbiont of host structure	C9|ALB
52185	0.0040865	0.029193	2	2	910	14228	modification of structure of other organism involved in symbiotic interaction	C9|ALB
52188	0.0040865	0.029193	2	2	910	14228	modification of cellular component in other organism involved in symbiotic interaction	C9|ALB
44004	0.0040865	0.029193	2	2	910	14228	disruption by symbiont of host cells	C9|ALB
60509	0.0040865	0.029193	2	2	910	14228	Type I pneumocyte differentiation	LTA4H|IGF1
52331	0.0040865	0.029193	2	2	910	14228	hemolysis of cells in other organism involved in symbiotic interaction	C9|ALB
52332	0.0040865	0.029193	2	2	910	14228	modification by organism of cell membrane in other organism involved in symbiotic interaction	C9|ALB
44179	0.0040865	0.029193	2	2	910	14228	hemolysis of cells in other organism	C9|ALB
60620	0.0040865	0.029193	2	2	910	14228	regulation of cholesterol import	APOA2|APOC3
60621	0.0040865	0.029193	2	2	910	14228	negative regulation of cholesterol import	APOA2|APOC3
19682	0.0040865	0.029193	2	2	910	14228	glyceraldehyde-3-phosphate metabolic process	TPI1|TALDO1
60696	0.0040865	0.029193	2	2	910	14228	regulation of phospholipid catabolic process	APOC2|APOC1
19836	0.0040865	0.029193	2	2	910	14228	hemolysis by symbiont of host erythrocytes	C9|ALB
19853	0.0040865	0.029193	2	2	910	14228	L-ascorbic acid biosynthetic process	GSTO1|AKR1A1
45653	0.0040865	0.029193	2	2	910	14228	negative regulation of megakaryocyte differentiation	HIST1H4L|PF4
6705	0.0040865	0.029193	2	2	910	14228	mineralocorticoid biosynthetic process	CPN2|CPN1
7597	0.0040865	0.029193	2	2	910	14228	blood coagulation, intrinsic pathway	APOH|F12
32341	0.0040865	0.029193	2	2	910	14228	aldosterone metabolic process	CPN2|CPN1
32342	0.0040865	0.029193	2	2	910	14228	aldosterone biosynthetic process	CPN2|CPN1
1655	0.0041354	0.029492	18	142	910	14228	urogenital system development	SERPINF1|TNC|PCSK9|ARID5B|UBE3A|MIF|IGF1|TAZ|NID1|BMP7|GLI3|AGT|DCN|RBP4|CA2|BASP1|CEP290|CD44
45429	0.0041669	0.029666	6	25	910	14228	positive regulation of nitric oxide biosynthetic process	HSP90AA1|HBB|TICAM1|SOD2|EGFR|ICAM1
60627	0.0043949	0.031236	16	121	910	14228	regulation of vesicle-mediated transport	TGFB1|B4GALT1|AHSG|ADIPOQ|SFTPD|SERPINE1|PCSK9|APOC3|VTN|CDK5|APOC2|APOC1|CDH13|CALR|MBL2|SNCA
22411	0.004428	0.031324	10	60	910	14228	cellular component disassembly	DFFA|LAMB2|PLG|LAMC1|HRG|BAZ1B|DNASE1L3|PAFAH1B1|SOD1|ENG
31647	0.004428	0.031324	10	60	910	14228	regulation of protein stability	ERAF|APOA2|FLNA|APOA1|CALR|DSC1|DSC2|CPN2|DSC3|ASGR2
43068	0.0044298	0.031324	43	445	910	14228	positive regulation of programmed cell death	APP|COL18A1|B4GALT1|PDCD6|HP|PCSK9|PLG|BRCA2|THBS1|PTPRF|KNG1|SART1|C6|PPP2R4|C9|PRDX1|TUBB1|APOE|EIF5A|PDIA3|CASP8AP2|MED1|SAP30BP|DFFA|GPX1|TGFB1|SORT1|HGF|ADIPOQ|ITGA1|MST1|DAPK3|TICAM1|BMP7|MMP9|IGF2R|AGT|SOD1|TIAM1|ERCC3|CDK5|CD44|ITM2B
60840	0.0045014	0.031434	5	18	910	14228	artery development	ANGPTL3|APOE|APOB|GLI3|ENG
34105	0.0045056	0.031434	3	6	910	14228	positive regulation of tissue remodeling	B4GALT1|CA2|SPP1
10656	0.0045056	0.031434	3	6	910	14228	negative regulation of muscle cell apoptosis	APOH|IGF1|HRG
10738	0.0045056	0.031434	3	6	910	14228	regulation of protein kinase A signaling cascade	AKAP12|ADIPOQ|MIF
55078	0.0045056	0.031434	3	6	910	14228	sodium ion homeostasis	C7|CPN2|AGT
6642	0.0045056	0.031434	3	6	910	14228	triglyceride mobilization	APOC3|IL6ST|APOB
48261	0.0045056	0.031434	3	6	910	14228	negative regulation of receptor-mediated endocytosis	APOC2|APOC1|APOC3
32429	0.0045056	0.031434	3	6	910	14228	regulation of phospholipase A2 activity	LRP1|ANG|EGFR
10594	0.0045799	0.031899	8	42	910	14228	regulation of endothelial cell migration	EFNA1|TGFB1|ITGB3|APOH|KDR|APOE|THBS1|AGT
3018	0.004606	0.031974	9	51	910	14228	vascular process in circulatory system	GCLC|GPX1|ITGA1|HBB|APOE|SOD2|AGT|KNG1|SOD1
45834	0.004606	0.031974	9	51	910	14228	positive regulation of lipid metabolic process	TGFB1|APOC2|ADIPOQ|APOC1|ANGPTL3|APOA2|APOA1|APOE|AGT
8283	0.0047533	0.032942	42	434	910	14228	cell proliferation	LAMA5|CSF1R|ENPEP|LRP1|DCTN2|CSF1|IL5RA|DBI|TXN|PRL|BRCA2|EGFR|UBE2L3|KIF15|PRDX1|PDPN|STAT4|MED1|USP8|GPX1|TGFB1|IGFBP4|SERPINF1|AMBN|KRT2|HGF|APOA1|MIF|IGF1|OSMR|AGT|POLA1|RBP4|CDK5|CDK3|ALMS1|UBE2V2|CDH13|TGFBI|HRG|MET|PAFAH1B1
44106	0.0048304	0.03342	32	309	910	14228	cellular amine metabolic process	ACY1|PON1|LCAT|DBH|PEPD|GHR|RARS|TPR|HARS|SNCA|GGT5|BCHE|WARS|GOT1|GSS|BHMT2|APOA2|GGH|APOA1|PGD|FAH|AGT|BHMT|FABP3|GCLC|BCAM|MTHFD1|CPS1|IARS|HPD|PAFAH1B1|OTC
16192	0.0048405	0.033435	54	590	910	14228	vesicle-mediated transport	ITSN2|FCN1|APP|FCN2|POP1|DENND1A|CLTC|MIA3|UBE3A|FNBP1L|ASGR2|GHR|MRC2|MRC1|SDF4|LBP|MBL2|CAP1|CD93|AHSG|SFTPD|APLP1|VPS13A|MYO7A|ANK1|YWHAZ|NME1|ELMO1|SEC22B|FTL|CFD|CRP|SPTBN4|UNQ5811|VCP|LRP1|THBS1|CPN1|CPLX3|LMAN1|MYO6|FLNA|CD14|APOE|SNCA|MARCKSL1|VDP|GSN|GOT1|SORT1|RAB3IP|IGF2R|PIKFYVE|CDK5
12501	0.0048623	0.03353	53	577	910	14228	programmed cell death	APP|TRAF3IP2|PDCD6|HP|TNFAIP3|DBI|KRT20|CLU|COMP|LGALS1|SRGN|SAP30BP|DFFA|GPX1|MAGI3|HGF|DAPK3|APLP1|CKAP2|DNAJB13|F2|TICAM1|TIAM1|PKM|ELMO1|TOP1|CRYAA|PFN1|CRYAB|MET|DNASE1L3|VCP|LRP1|CD5L|PLG|THBS1|C6|C9|CD14|CASP8AP2|GSN|CADM1|PKM2|API5|HBG1|EIF2AK1|SOD2|SOD1|GGCT|TF|ALMS1|ITM2B|IL17A
6302	0.0050002	0.034424	10	61	910	14228	double-strand break repair	POLA1|VCP|UBE2V2|UBE2N|RAP80|BAZ1B|BRCA2|NHEJ1|SOD1|RAD54B
2694	0.0051729	0.035554	21	179	910	14228	regulation of leukocyte activation	VCAM1|TGFB1|HGF|SFTPD|SPINK5|MIF|PDCD1LG2|TICAM1|THBS1|SOD1|SART1|EFNB1|PNP|VNN1|CNR2|FAP|SCGB1A1|CLPTM1|LBP|IL6ST|SNCA
10942	0.0051892	0.035607	43	449	910	14228	positive regulation of cell death	APP|COL18A1|B4GALT1|PDCD6|HP|PCSK9|PLG|BRCA2|THBS1|PTPRF|KNG1|SART1|C6|PPP2R4|C9|PRDX1|TUBB1|APOE|EIF5A|PDIA3|CASP8AP2|MED1|SAP30BP|DFFA|GPX1|TGFB1|SORT1|HGF|ADIPOQ|ITGA1|MST1|DAPK3|TICAM1|BMP7|MMP9|IGF2R|AGT|SOD1|TIAM1|ERCC3|CDK5|CD44|ITM2B
30005	0.0052565	0.035985	25	226	910	14228	cellular di-, tri-valent inorganic cation homeostasis	CCL14|APP|HEXB|IREB2|HP|KNG1|HSP90B1|HPX|APOE|CD55|TGFB1|SLC30A5|GSS|F2|CP|SOD1|TF|CACNB4|LCN2|SAA1|SAA2|CALR|IL6ST|FTL|LTF
43244	0.0052615	0.035985	9	52	910	14228	regulation of protein complex disassembly	EIF5A|SPTBN4|SPTBN5|GSN|CAPZB|CFL1|EIF5A2|CAPG|SPTBN1
35467	0.0052767	0.03603	28	262	910	14228	negative regulation of signaling pathway	LRP1|LECT2|HP|TNFAIP3|TAZ|THBS1|PTPRF|GLI3|DAG1|SKIL|SNCA|IGFBP5|AMBP|HSPA5|AHSG|ADIPOQ|MST1|MIF|IGF1|BMP7|AGT|DKK3|RGS12|CALR|IL6ST|PFDN5|CD44|ENG
45766	0.0053183	0.036244	8	43	910	14228	positive regulation of angiogenesis	C5|TF|ECM1|C6|SERPINE1|ANGPTL3|THBS1|CAMP
3012	0.0053254	0.036244	20	168	910	14228	muscle system process	TPM4|TPM3|ITGA1|TNC|IGF1|TAZ|AGT|KNG1|SOD1|TTN|ACTA1|MYL1|MB|MYH8|ANKRD2|UTRN|TLN1|ALDOA|CRYAB|VCL
2920	0.0054357	0.036935	4	12	910	14228	regulation of humoral immune response	HPX|C6|MASP1|A2M
40013	0.005761	0.039081	11	72	910	14228	negative regulation of locomotion	C5|TGFB1|IGFBP5|APOH|SERPINE1|HP|DAG1|MIA3|APOE|THBS1|VCL
34103	0.005792	0.039164	5	19	910	14228	regulation of tissue remodeling	CST3|B4GALT1|CA2|ITGB3|SPP1
45104	0.005792	0.039164	5	19	910	14228	intermediate filament cytoskeleton organization	KRT14|NEFM|KRT20|SOD1|KRT9
30003	0.0058814	0.039704	27	252	910	14228	cellular cation homeostasis	CCL14|APP|HEXB|IREB2|HP|KNG1|HSP90B1|HPX|C7|APOE|CD55|TGFB1|SLC30A5|GSS|F2|CP|AGT|SOD1|TF|CACNB4|LCN2|SAA1|SAA2|CALR|IL6ST|FTL|LTF
32272	0.0059387	0.040026	7	35	910	14228	negative regulation of protein polymerization	SPTBN4|SPTBN5|GSN|CAPZB|TMSB4X|CAPG|SPTBN1
7411	0.0061109	0.041093	13	93	910	14228	axon guidance	SPON2|APP|NRP2|L1CAM|BMP7|GLI3|EXT1|EFNB1|ALCAM|CDK5|B3GNT2|PAM|PVRL1
34622	0.0061167	0.041093	32	314	910	14228	cellular macromolecular complex assembly	APCS|AHCTF1|COX15|TAZ|TTN|CCT6B|TUBB8|PSMD9|SART1|ZNHIT6|TUBB1|FLNA|FBXO5|FGB|FGA|HSP90AA1|GSN|SF3A2|TGFB1|HIST1H4L|HSPA4|FGG|TBCA|FKBP1A|CDK5|TCP1|ANG|CALR|ALDOB|HRG|CRYAA|CRYAB
51258	0.0061442	0.041145	8	44	910	14228	protein polymerization	TUBB8|FGB|FGA|GSN|TUBB1|FGG|ANG|FBXO5
19218	0.0061442	0.041145	8	44	910	14228	regulation of steroid metabolic process	APOC1|APOA2|APOA1|APOE|APOB|AGT|SOD1|DKK3
1932	0.0061792	0.041313	24	217	910	14228	regulation of protein amino acid phosphorylation	TGFB1|EIF2AK1|ITGB3|HGF|ADIPOQ|APOA1|MIF|IGF1|F2|TAZ|BMP7|EGFR|AGT|THBS4|GHR|HPX|VTN|CCDC88A|CLC|CRYAA|IL6ST|CAMP|CD44|ENG
6090	0.0062441	0.041614	6	27	910	14228	pyruvate metabolic process	GPI|RBP4|TPI1|GPT|ALDOB|AGT
48678	0.0062441	0.041614	6	27	910	14228	response to axon injury	LGALS1|LAMB2|RTN4RL2|APOE|SOD2|SOD1
46660	0.0063142	0.042014	12	83	910	14228	female sex differentiation	MED1|RBP4|TGFB1|HBG1|KDR|UBE3A|ANG|MIF|BRCA2|FAH|AGT|SOD1
44257	0.0064056	0.042554	32	315	910	14228	cellular protein catabolic process	VCP|USP38|PCSK9|UBE3A|PLG|PSMA7|HSP90B1|UBE2L3|PSMB6|PSMD9|C6|PSMB5|PSMB3|CDH1|PSMB1|SKP1|USP8|ANAPC7|HSPA5|RAD23A|UBE2G2|UCHL3|PSMA6|BACE2|PSMA3|PSMA4|PSMA1|PSMA2|UBE2N|MYH9|RBCK1|PCYOX1
42330	0.0064765	0.04287	20	171	910	14228	taxis	NRP2|SERPIND1|HGF|LECT2|ITGA1|SFTPD|MIF|PPBP|RNASE2|CREB3|C5|C7|ENPP2|SAA1|SAA2|LBP|S100A9|S100A8|ENG|PF4
6935	0.0064765	0.04287	20	171	910	14228	chemotaxis	NRP2|SERPIND1|HGF|LECT2|ITGA1|SFTPD|MIF|PPBP|RNASE2|CREB3|C5|C7|ENPP2|SAA1|SAA2|LBP|S100A9|S100A8|ENG|PF4
43123	0.006484	0.04287	15	115	910	14228	positive regulation of I-kappaB kinase/NF-kappaB cascade	ECM1|GOT1|TRAF3IP2|ADIPOQ|TICAM1|ZDHHC17|FKBP1A|LGALS1|TSPAN6|UBE2N|FLNA|S100A12|S100A4|RBCK1|APOL3
32944	0.0066886	0.044153	13	94	910	14228	regulation of mononuclear cell proliferation	VCAM1|TGFB1|CSF1|HGF|SFTPD|MIF|PDCD1LG2|TICAM1|EFNB1|PNP|FAP|SCGB1A1|IL6ST
46425	0.0069742	0.045966	7	36	910	14228	regulation of JAK-STAT cascade	GHR|HPX|HGF|IGF1|CLC|PRL|IL6ST
43122	0.0070303	0.046262	16	127	910	14228	regulation of I-kappaB kinase/NF-kappaB cascade	ECM1|GOT1|TRAF3IP2|ADIPOQ|TNFAIP3|TICAM1|ZDHHC17|FKBP1A|LGALS1|TSPAN6|UBE2N|FLNA|S100A12|S100A4|RBCK1|APOL3
9408	0.0070698	0.046449	10	64	910	14228	response to heat	CPB2|GCLC|C7|HSPA1L|HSPA4|CD14|CRYAA|CRYAB|THBS1|SOD1
51051	0.00713	0.046771	19	161	910	14228	negative regulation of transport	SRGN|TGFB1|ITGB3|ADIPOQ|APOA2|APOA1|APOC3|TXN|TAZ|THBS1|PSMD9|CDK5|APOC2|APOC1|FLNA|HRG|CRYAA|CRYAB|SNCA
10604	0.0072796	0.047356	79	941	910	14228	positive regulation of macromolecule metabolic process	KDM5A|APP|CSF1|POP1|ITGB3|HP|PCSK9|UBE3A|TAZ|GLI3|GHR|RPS4X|PSMD9|PPP2R4|CDH1|FBXO5|RAP80|CAMP|SKP1|EIF5A|MED1|ANAPC7|HGF|ADIPOQ|APOA2|MIF|F2|BAZ1B|TICAM1|PSMA6|CREB3|PSMA3|PSMA4|RFX6|PSMA1|PSMA2|IRF1|NARG1L|CDH13|CRYAA|IL6ST|CD44|ENG|VCP|NOTCH4|EIF5A2|THBS1|PSMA7|THBS4|PSMB6|HPX|VTN|C6|PSMB5|PSMB3|MYO6|PSMB1|APOE|SNCA|SPEN|TGFB1|HSPA5|F12|GTF2H1|IGF1|BMP7|AGT|FKBP1A|GCLC|ERCC3|FAP|UBE2N|CALR|CLC…
70663	0.0073088	0.047356	13	95	910	14228	regulation of leukocyte proliferation	VCAM1|TGFB1|CSF1|HGF|SFTPD|MIF|PDCD1LG2|TICAM1|EFNB1|PNP|FAP|SCGB1A1|IL6ST
71219	0.0073228	0.047356	5	20	910	14228	cellular response to molecule of bacterial origin	SERPINE1|CD14|LBP|TICAM1|CAMP
50794	0.0073606	0.047356	433	6209	910	14228	regulation of cellular process	ITSN2|ZNF174|POP1|SERPINE1|ENO1|SMC3|FGFRL1|CRHBP|NDST1|PSMD9|ALCAM|CAPNS1|MED1|SAP30BP|SERPINF1|DAPK3|MED4|SND1|HCFC1|DKK3|RBP4|BCAM|RFX6|SPARCL1|RBCK1|HPRT1|HPX|C5|C6|C7|C9|PRDX1|MYO6|S100A12|RSU1|ATRIP|MCTS1|ABCA2|CADM1|EIF2AK1|EIF2AK4|L1CAM|ZNF35|PRDX6|TREML1|BHMT|COL1A2|HRG|PAM|HEXB|ARHGAP1|ZNF44|GLI3|SERPINA5|SMG6|PPP2R4|CHL1|ZNF280A|TMSB4X|TIMP2|NEFM|TIMP1|DFFA|AHSG|PGAM1|F2|BAZ1B|ERP70|PS…
10744	0.0074588	0.047356	4	13	910	14228	positive regulation of macrophage derived foam cell differentiation	CSF1|APOB|AGT|PF4
30201	0.0074588	0.047356	4	13	910	14228	heparan sulfate proteoglycan metabolic process	EXT1|NDST1|EXT2|SULF2
46716	0.0074588	0.047356	4	13	910	14228	muscle cell homeostasis	LARGE|PLG|ALDOA|SOD1
32760	0.0074588	0.047356	4	13	910	14228	positive regulation of tumor necrosis factor production	CD14|LBP|TICAM1|PF4
33599	0.0075115	0.047356	3	7	910	14228	regulation of mammary gland epithelial cell proliferation	MED1|GPX1|BRCA2
1573	0.0075115	0.047356	3	7	910	14228	ganglioside metabolic process	GM2A|HEXB|ST3GAL5
34372	0.0075115	0.047356	3	7	910	14228	very-low-density lipoprotein particle remodeling	APOC2|LCAT|APOE
42730	0.0075115	0.047356	3	7	910	14228	fibrinolysis	KRT1|GP1BA|F2
10269	0.0075115	0.047356	3	7	910	14228	response to selenium ion	GPX1|GPX3|APOB
35304	0.0075115	0.047356	3	7	910	14228	regulation of protein amino acid dephosphorylation	TGFB1|PPP2R4|HP
2544	0.0075115	0.047356	3	7	910	14228	chronic inflammatory response	VCAM1|VNN1|THBS1
60122	0.0075115	0.047356	3	7	910	14228	inner ear receptor stereocilium organization	GPR98|MYO7A|SOD1
19430	0.0075115	0.047356	3	7	910	14228	removal of superoxide radicals	PRDX1|SOD2|SOD1
20027	0.0075115	0.047356	3	7	910	14228	hemoglobin metabolic process	HPX|ERAF|CAT
71451	0.0075115	0.047356	3	7	910	14228	cellular response to superoxide	PRDX1|SOD2|SOD1
71450	0.0075115	0.047356	3	7	910	14228	cellular response to oxygen radical	PRDX1|SOD2|SOD1
30502	0.0075115	0.047356	3	7	910	14228	negative regulation of bone mineralization	SRGN|ECM1|AHSG
6030	0.0075115	0.047356	3	7	910	14228	chitin metabolic process	CHIT1|CHI3L1|CTBS
6032	0.0075115	0.047356	3	7	910	14228	chitin catabolic process	CHIT1|CHI3L1|CTBS
7016	0.0075115	0.047356	3	7	910	14228	cytoskeletal anchoring at plasma membrane	SPTBN4|DAG1|TLN1
2688	0.0075257	0.047356	6	28	910	14228	regulation of leukocyte chemotaxis	C5|C7|HGF|SERPINE1|THBS1|THBS4
60688	0.0075257	0.047356	6	28	910	14228	regulation of morphogenesis of a branching structure	TGFB1|CDH1|HGF|NTN4|BMP7|FGFR1
45598	0.0075257	0.047356	6	28	910	14228	regulation of fat cell differentiation	TGFB1|HGF|ADIPOQ|ALMS1|TAZ|SOD2
51789	0.0075914	0.047698	15	117	910	14228	response to protein stimulus	APCS|HSP90AA1|VCP|TGFB1|HSPA1L|HSPA5|ATF6B|HSPA4|EIF2AK1|F12|EIF2AK4|CLU|CREB3|ERP44|ALDOB
34329	0.0076665	0.048025	9	55	910	14228	cell junction assembly	LAMA5|LAMB2|ITGB3|ACTN1|KRT14|HP|LAMC1|TLN1|VCL
6898	0.0076665	0.048025	9	55	910	14228	receptor-mediated endocytosis	CAP1|GHR|LRP1|SFTPD|CLTC|MRC1|APOE|IGF2R|SNCA
